# Supplementary material for: Soil Organic Carbon Attenuates the Influence of Plants on Root-Associated Bacterial Community
Source: Front Microbiol. 2020 Nov 9;11:594890. doi: 10.3389/fmicb.2020.594890 (PMC7680919; doi:10.3389/fmicb.2020.594890)
Supplement: Supplementary file 1 [file Data_Sheet_1.xlsx]

## Sheet: Supplementary Table 1
Note: The average abundance and difference of bacterial taxa in each group and all sand samples. The root-associated bacterial biomarkers with high effect size in sand culture are highlighted. OTU enriched by both plants are highlighted with pink background. OTUs enriched by PN are highlighted with yellow background, while OTUs enriched by SG are highlighted with green background.
OTU_ID	Taxonomy	P values (corrected)	Effect size	Average	PN (%)	SG (%)	CK (%)
OTU_3	k__Bacteria;p__Proteobacteria;c__Alphaproteobacteria;o__Sphingomonadales;f__Sphingomonadaceae;g__Novosphingobium;s__	2.35834e-05	0.971323	4.07825	1.61041	10.4371	0.187257
OTU_36	k__Bacteria;p__Proteobacteria;c__Alphaproteobacteria;o__Caulobacterales;f__Caulobacteraceae;g__Asticcacaulis;s__	1.32349e-05	0.976346	0.559554	1.33612	0.309245	0.0332918
OTU_17	k__Bacteria;p__Saccharibacteria;c__;o__;f__;g__;s__	0.00336453	0.850155	1.02642	3.04451	0.0208873	0.0138707
OTU_107	k__Bacteria;p__Proteobacteria;c__Alphaproteobacteria;o__Rhizobiales	0.00173316	0.879881	0.200182	0.424753	0.0689273	0.106865
OTU_78	k__Bacteria;p__Proteobacteria;c__Alphaproteobacteria;o__Rhizobiales;f__Bradyrhizobiaceae;g__Bosea;s__Bosea_thiooxidans	6.95869e-05	0.958868	0.547257	1.15571	0.182194	0.303871
OTU_215	k__Bacteria;p__Verrucomicrobia;c__Verrucomicrobiae;o__Verrucomicrobiales;f__Verrucomicrobiaceae;g__Verrucomicrobium;s__	6.92038e-07	0.991155	0.125934	0.370881	0.00414034	0.00278015
OTU_373	k__Bacteria;p__TM6;c__;o__;f__;g__;s__	0.000153057	0.946509	0.037347	0.107868	0.00417329	0
OTU_693	k__Bacteria;p__Acidobacteria;c__unidentified_Acidobacteria;o__Subgroup_6;f__;g__;s__	0.000491285	0.921094	0.0106276	0.029078	0.00141585	0.00138889
OTU_615	k__Bacteria;p__Proteobacteria;c__Gammaproteobacteria;o__Legionellales;f__Legionellaceae;g__Legionella	0.000937243	0.902137	0.0152215	0.0414955	0	0.00416904
OTU_720	k__Bacteria;p__Proteobacteria;c__Betaproteobacteria;o__TRA3-20	0.00138158	0.888624	0.00875974	0.0248963	0.0013829	0
OTU_92	k__Bacteria;p__Proteobacteria;c__Deltaproteobacteria;o__Bdellovibrionales;f__Bdellovibrionaceae;g__Bdellovibrio;s__	0.00204277	0.873116	0.272752	0.52031	0.166289	0.131656
OTU_222	k__Bacteria;p__Proteobacteria;c__Alphaproteobacteria;o__Rhodospirillales;f__CCU22;g__;s__	0.0020897	0.872152	0.101573	0.260286	0.0194469	0.0249876
OTU_273	k__Bacteria;p__Proteobacteria;c__Betaproteobacteria;o__Burkholderiales;f__Comamonadaceae;g__Pseudacidovorax;s__	0.00229027	0.868186	0.125871	0.363725	0.0111082	0.00278015
OTU_49	k__Bacteria;p__Proteobacteria;c__Alphaproteobacteria;o__Caulobacterales;f__Caulobacteraceae;g__Phenylobacterium;s__	0.00254828	0.863411	1.43408	2.56497	0.665317	1.07195
OTU_72	k__Bacteria;p__Proteobacteria;c__Alphaproteobacteria;o__Rhodospirillales;f__Rhodospirillaceae;g__Defluviicoccus;s__	0.000297008	0.93328	0.401192	0.177093	0.73508	0.291401
OTU_879	k__Bacteria;p__Bacteroidetes;c__Flavobacteriia;o__Flavobacteriales;f__Flavobacteriaceae;g__Chryseobacterium	3.57103e-06	0.984715	0.00602953	0	0.0180886	0
OTU_1000	k__Bacteria;p__Chloroflexi;c__Anaerolineae;o__Anaerolineales;f__Anaerolineaceae;g__;s__	8.34614e-05	0.956299	0.00697482	0	0.0209245	0
OTU_89	k__Bacteria;p__Proteobacteria;c__Alphaproteobacteria;o__Caulobacterales;f__Caulobacteraceae;g__;s__	0.000648026	0.913464	0.0245718	0.00554647	0.0612257	0.00694312
OTU_709	k__Bacteria;p__Proteobacteria;c__Alphaproteobacteria;o__Rhodobacterales;f__Rhodobacteraceae;g__Rubellimicrobium;s__	0.000819513	0.90642	0.0181519	0	0.0544556	0
OTU_1020	k__Bacteria;p__Proteobacteria;c__Alphaproteobacteria;o__Sphingomonadales;f__Erythrobacteraceae	0.00328136	0.8514	0.104261	0.0457041	0.167181	0.0998974
OTU_899	k__Bacteria;p__Verrucomicrobia;c__OPB35_soil_group;o__;f__;g__;s__	0.003515	0.847954	0.00740825	0	0.0222247	0
OTU_84	k__Bacteria;p__Proteobacteria;c__Alphaproteobacteria;o__Rhizobiales	0.00931556	0.789588	0.583495	0.824057	0.830725	0.095702
OTU_204	k__Bacteria;p__Proteobacteria;c__Alphaproteobacteria;o__Rhizobiales;f__Hyphomicrobiaceae;g__Devosia;s__	0.0409931	0.655198	0.498613	0.71283	0.669312	0.113698
OTU_884	k__Bacteria;p__Actinobacteria;c__Thermoleophilia;o__Gaiellales;f__Gaiellaceae;g__Gaiella;s__	0.0451974	0.643791	0.00508247	0.00691943	0.00693908	0.00138889
OTU_261	k__Bacteria;p__Actinobacteria;c__Thermoleophilia;o__Solirubrobacterales	0.00393889	0.842072	0.0698098	0.181478	0.0237933	0.00415821
OTU_1152	k__Bacteria;p__Proteobacteria;c__Alphaproteobacteria;o__Rhizobiales	0.00416822	0.839065	0.00369445	0.0110833	0	0
OTU_536	k__Bacteria;p__Proteobacteria;c__Alphaproteobacteria;o__Rhizobiales	0.00648091	0.813557	0.0180147	0.042902	0.00279457	0.00834759
OTU_794	k__Bacteria;p__Proteobacteria;c__Deltaproteobacteria;o__Bdellovibrionales;f__Bdellovibrionaceae;g__Bdellovibrio	0.00667034	0.811758	0.00600141	0.0180042	0	0
OTU_440	k__Bacteria;p__Proteobacteria;c__Alphaproteobacteria;o__Rhizobiales;f__Xanthobacteraceae;g__Variibacter;s__	0.0080961	0.799202	0.0694576	0.110728	0.0810267	0.0166183
OTU_333	k__Bacteria;p__Firmicutes;c__Bacilli;o__Bacillales;f__;g__;s__	0.008702	0.794313	0.0402898	0.0691617	0.0447753	0.00693229
OTU_674	k__Bacteria;p__Proteobacteria;c__Deltaproteobacteria;o__Oligoflexales;f__;g__;s__	0.00902457	0.791802	0.00415199	0.0110671	0	0.00138889
OTU_501	k__Bacteria;p__Armatimonadetes;c__;o__;f__;g__;s__	0.0102401	0.782846	0.0221866	0.0595788	0.00141585	0.00556506
OTU_70	k__Bacteria;p__Proteobacteria;c__Betaproteobacteria;o__Burkholderiales;f__Comamonadaceae;g__Ideonella;s__	0.0128715	0.765644	0.869286	2.33161	0.237391	0.0388558
OTU_1168	k__Bacteria;p__Proteobacteria;c__Betaproteobacteria;o__Burkholderiales;f__Comamonadaceae;g__Ramlibacter;s__	0.0129218	0.765339	0.168261	0.282416	0.0752273	0.147141
OTU_448	k__Bacteria;p__Acidobacteria;c__unidentified_Acidobacteria;o__Subgroup_3;f__unidentified_Acidobacteria;g__Bryobacter	0.0141418	0.758175	0.0244772	0.0540242	0.00694743	0.0124601
OTU_894	k__Bacteria;p__Proteobacteria;c__Alphaproteobacteria;o__Rhizobiales;f__Phyllobacteriaceae	0.0148752	0.754065	0.267574	0.748463	0.0278923	0.0263656
OTU_770	k__Bacteria;p__Proteobacteria;c__Alphaproteobacteria	0.0149709	0.753539	0.0106153	0.0304672	0.00137872	0
OTU_172	k__Bacteria;p__Verrucomicrobia;c__Spartobacteria;o__Chthoniobacterales;f__FukuN18_freshwater_group;g__;s__	0.0175383	0.740186	0.138542	0.359971	0.0403505	0.0153039
OTU_75	k__Bacteria;p__Armatimonadetes;c__;o__;f__;g__;s__	0.019055	0.732903	0.306783	0.889793	0.0139111	0.0166447
OTU_218	k__Bacteria;p__Proteobacteria;c__Alphaproteobacteria;o__Rhodospirillales;f__Rhodospirillaceae;g__Ferrovibrio	0.0237832	0.712421	0.0927594	0.227037	0.0429311	0.00831034
OTU_521	k__Bacteria;p__Actinobacteria;c__Acidimicrobiia;o__Acidimicrobiales;f__;g__;s__	0.0263222	0.702532	0.0185115	0.0415779	0.0139566	0
OTU_437	k__Bacteria;p__Bacteroidetes;c__Cytophagia;o__Cytophagales;f__Cytophagaceae;g__Emticicia;s__	0.0275298	0.698051	0.063177	0.164358	0.0154342	0.00973886
OTU_221	k__Bacteria;p__Proteobacteria;c__Alphaproteobacteria;o__Sphingomonadales;f__Sphingomonadaceae;g__Sphingobium;s__Sphingobium_fuliginis	0.0275495	0.697978	0.100575	0.289239	0.00276579	0.00971852
OTU_349	k__Bacteria;p__Proteobacteria;c__Alphaproteobacteria;o__Rhodospirillales;f__Acetobacteraceae;g__Roseomonas;s__	0.0296886	0.690356	0.0532291	0.130303	0.0252133	0.00417142
OTU_634	k__Bacteria;p__Proteobacteria;c__Deltaproteobacteria;o__Bdellovibrionales;f__Bdellovibrionaceae;g__Bdellovibrio;s__Bdellovibrio_sp._JSF2	0.035068	0.672682	0.0138647	0.0415942	0	0
OTU_109	k__Bacteria;p__Proteobacteria;c__Betaproteobacteria;o__Burkholderiales;f__Comamonadaceae;g__Hydrogenophaga	0.0352231	0.6722	0.407413	0.95831	0.229256	0.0346723
OTU_659	k__Bacteria;p__Actinobacteria;c__Acidimicrobiia;o__Acidimicrobiales;f__Iamiaceae;g__Iamia;s__	0.0368645	0.667185	0.0152651	0.0388191	0.00697621	0
OTU_340	k__Bacteria;p__Proteobacteria;c__Betaproteobacteria;o__Nitrosomonadales;f__Nitrosomonadaceae;g__;s__	0.0409189	0.655406	0.0414774	0.120269	0.0013829	0.00278015
OTU_603	k__Bacteria;p__Gemmatimonadetes;c__unidentified_Gemmatimonadetes;o__Gemmatimonadales;f__Gemmatimonadaceae	0.0412164	0.654573	0.0161729	0.0471273	0	0.00139127
OTU_141	k__Bacteria;p__Bacteroidetes;c__Sphingobacteriia;o__Sphingobacteriales;f__Chitinophagaceae;g__Terrimonas;s__	0.0416926	0.653247	0.201638	0.395147	0.111244	0.0985226
OTU_188	k__Bacteria;p__Proteobacteria;c__Gammaproteobacteria;o__Xanthomonadales;f__Xanthomonadaceae;g__Lysobacter	0.0424216	0.651238	0.147416	0.331283	0.0860297	0.0249345
OTU_1240	k__Bacteria;p__Proteobacteria;c__Alphaproteobacteria;o__Rhizobiales;f__Hyphomicrobiaceae;g__Pedomicrobium;s__	0.0428481	0.650073	0.0152284	0.0332582	0.0110465	0.00138043
OTU_320	k__Bacteria;p__Chloroflexi;c__Chloroflexia;o__Kallotenuales;f__AKIW781;g__;s__	0.0461986	0.64118	0.0475788	0.0733493	0.0097007	0.0596865
OTU_601	k__Bacteria;p__Bacteroidetes;c__Sphingobacteriia;o__Sphingobacteriales;f__NS11-12_marine_group;g__;s__	0.047751	0.637205	0.00966298	0.0289889	0	0
OTU_864	k__Bacteria;p__Acidobacteria;c__unidentified_Acidobacteria;o__Subgroup_3;f__SJA-149	0.0477906	0.637105	0.00460642	0.0138193	0	0
OTU_94	k__Bacteria;p__Actinobacteria;c__unidentified_Actinobacteria;o__Micrococcales;f__Micrococcaceae;g__Arthrobacter;s__Arthrobacter_ureafaciens	0.0490386	0.633973	0.673467	1.01807	0.665532	0.336803
OTU_212	k__Bacteria;p__Proteobacteria;c__Betaproteobacteria;o__Burkholderiales;f__Comamonadaceae	0.0498023	0.632083	0.0961926	0.278888	0.00414034	0.00554948
OTU_234	k__Bacteria;p__Proteobacteria;c__Alphaproteobacteria;o__Rhodospirillales;f__Acetobacteraceae;g__Stella;s__	0.00614899	0.816796	0.0820105	0.0748845	0.157245	0.0139018
OTU_157	k__Bacteria;p__Bacteroidetes;c__Sphingobacteriia;o__Sphingobacteriales;f__Chitinophagaceae	0.00670718	0.811412	0.195015	0.1026	0.472721	0.00972327
OTU_572	k__Bacteria;p__Proteobacteria;c__Alphaproteobacteria;o__Rhodospirillales;f__Acetobacteraceae	0.00719878	0.806913	0.0223032	0.0138533	0.0516652	0.00139127
OTU_123	k__Bacteria;p__Proteobacteria;c__Betaproteobacteria;o__Burkholderiales;f__Oxalobacteraceae;g__Massilia	0.013751	0.760423	0.562108	0.142984	1.5004	0.0429454
OTU_115	k__Bacteria;p__Bacteroidetes;c__Sphingobacteriia;o__Sphingobacteriales;f__Chitinophagaceae;g__Flavisolibacter	0.0178381	0.738714	0.19015	0.00827131	0.372048	0.190132
OTU_910	k__Bacteria;p__Actinobacteria;c__unidentified_Actinobacteria;o__Frankiales;f__Nakamurellaceae;g__Nakamurella;s__	0.0179105	0.738361	0.00834812	0	0.0250444	0
OTU_151	k__Bacteria;p__Proteobacteria;c__Betaproteobacteria;o__Nitrosomonadales;f__Nitrosomonadaceae;g__Nitrosomonas;s__	0.0194081	0.731263	0.16155	0.199269	0.231262	0.054118
OTU_713	k__Bacteria;p__Proteobacteria;c__Alphaproteobacteria;o__Sphingomonadales;f__Sphingomonadaceae;g__Sphingomonas	0.0206687	0.725566	0.0936791	0.0470856	0.148019	0.0859327
OTU_122	k__Bacteria;p__Gemmatimonadetes;c__unidentified_Gemmatimonadetes;o__Gemmatimonadales;f__Gemmatimonadaceae	0.0229012	0.716021	0.00417777	0	0.0028317	0.00970161
OTU_79	k__Bacteria;p__Proteobacteria;c__Alphaproteobacteria;o__Rhizobiales;f__Methylobacteriaceae;g__Microvirga;s__	0.0247178	0.708703	0.0115579	0.0124448	0.0166769	0.00555185
OTU_189	k__Bacteria;p__Proteobacteria;c__Alphaproteobacteria;o__Rhodospirillales;f__Rhodospirillaceae;g__Inquilinus;s__	0.0287312	0.69372	0.143553	0.0636485	0.217157	0.149853
OTU_175	k__Bacteria;p__Deinococcus-Thermus;c__Deinococci;o__Deinococcales;f__Deinococcaceae;g__Deinococcus;s__Deinococcus_cellulosilyticus	0.0298993	0.689625	0.117161	0.00834411	0.343139	0
OTU_44	k__Bacteria;p__Acidobacteria;c__unidentified_Acidobacteria;o__Subgroup_3;f__unidentified_Acidobacteria;g__Bryobacter;s__	0.0299995	0.689279	0.0212861	0.0193772	0.0361359	0.00834522
OTU_441	k__Bacteria;p__Proteobacteria;c__Gammaproteobacteria;o__Pseudomonadales;f__Pseudomonadaceae;g__Pseudomonas;s__Pseudomonas_psychrotolerans	0.0336848	0.677043	0.0226461	0	0.0679383	0
OTU_88	k__Bacteria;p__Firmicutes;c__Bacilli;o__Bacillales;f__Paenibacillaceae;g__Oxalophagus;s__	0.0339292	0.676264	0.010162	0.0124448	0.0152611	0.00278015
OTU_664	k__Bacteria;p__Armatimonadetes;c__;o__;f__;g__;s__	0.0411969	0.654627	0.00794347	0	0.0238304	0
OTU_137	k__Bacteria;p__Actinobacteria;c__unidentified_Actinobacteria;o__Corynebacteriales;f__Mycobacteriaceae;g__Mycobacterium	0.0442973	0.646172	0.548484	0.248127	0.75673	0.640595
OTU_100	k__Bacteria;p__Bacteroidetes;c__Sphingobacteriia;o__Sphingobacteriales;f__Chitinophagaceae;g__unidentified_Chitinophagaceae;s__Chitinophaga_sp._WW1.2011.	0.0474682	0.637923	0.217845	0.113272	0.483336	0.0569262
OTU_652	k__Bacteria;p__Actinobacteria;c__Thermoleophilia;o__Gaiellales;f__unidentified_Gaiellales;g__unidentified_Gaiellales;s__Gaiella_sp._EBR4-R2	0.048041	0.636472	0.0328737	0.0290924	0.0473392	0.0221895
OTU_34	k__Bacteria;p__Proteobacteria;c__Alphaproteobacteria;o__Rhizobiales;f__Rhizobiaceae	2.59406e-05	0.970398	0.930862	1.71741	0.903387	0.171792
OTU_59	k__Bacteria;p__Proteobacteria;c__Alphaproteobacteria;o__Rhodospirillales;f__Rhodospirillaceae;g__Azospirillum	0.000168617	0.944754	0.500924	0.12472	1.13676	0.241295
OTU_238	k__Bacteria;p__Chlorobi;c__Chlorobia;o__Chlorobiales;f__OPB56;g__;s__	7.12124e-07	0.99107	0.0670614	0	0.00421042	0.196974
OTU_51	k__Bacteria;p__Cyanobacteria;c__Melainabacteria;o__Obscuribacterales;f__;g__;s__	2.47793e-06	0.986468	0.57819	0.0206999	0.0293249	1.68455
OTU_315	k__Bacteria;p__Fibrobacteres;c__Fibrobacteria;o__Fibrobacterales;f__Fibrobacteraceae;g__possible_genus_04;s__	2.80386e-06	0.985899	0.0443812	0	0.00558914	0.127554
OTU_747	k__Bacteria;p__Proteobacteria;c__Alphaproteobacteria;o__Rhodospirillales;f__Rhodospirillaceae;g__;s__	5.07901e-06	0.982811	0.00970413	0.00276844	0	0.026344
OTU_405	k__Bacteria;p__Chloroflexi;c__Gitt-GS-136;o__;f__;g__;s__	9.28411e-06	0.978983	0.0499353	0.0124755	0.013874	0.123457
OTU_1	k__Bacteria;p__Proteobacteria;c__Alphaproteobacteria;o__Sphingomonadales	1.5548e-05	0.975041	6.12617	0.576047	2.42454	15.3779
OTU_701	k__Bacteria;p__Proteobacteria;c__Deltaproteobacteria;o__Bdellovibrionales;f__Bdellovibrionaceae;g__Bdellovibrio;s__	2.06417e-05	0.972569	0.00832197	0	0	0.0249659
OTU_6	k__Bacteria;p__Proteobacteria;c__Betaproteobacteria;o__Methylophilales;f__Methylophilaceae;g__;s__	3.44526e-05	0.967461	2.04615	0.10637	0.162913	5.86916
OTU_28	k__Bacteria;p__Proteobacteria;c__Gammaproteobacteria;o__Xanthomonadales;f__Xanthomonadaceae;g__Panacagrimonas;s__	6.08983e-05	0.960657	0.815435	0.267094	0.0971885	2.08202
OTU_650	k__Bacteria;p__Proteobacteria;c__Gammaproteobacteria;o__Pseudomonadales;f__Moraxellaceae;g__Acinetobacter	0.000108834	0.952256	0.0106262	0.00138255	0	0.0304961
OTU_71	k__Bacteria;p__Cyanobacteria;c__Melainabacteria;o__Obscuribacterales;f__;g__;s__	0.000216124	0.939988	0.377306	0.011046	0.0799283	1.04094
OTU_359	k__Bacteria;p__Proteobacteria;c__Deltaproteobacteria;o__Oligoflexales;f__Oligoflexaceae;g__Oligoflexus;s__	0.000323212	0.931373	0.0416257	0	0.00424755	0.12063
OTU_417	k__Bacteria;p__Proteobacteria;c__Deltaproteobacteria	0.000470537	0.922221	0.0263356	0.00829718	0	0.0707097
OTU_21	k__Bacteria;p__Acidobacteria;c__unidentified_Acidobacteria;o__Subgroup_3;f__Elev-16S-1166;g__;s__	0.000470824	0.922205	0.834321	0.475922	0.263499	1.76354
OTU_378	k__Bacteria;p__Actinobacteria;c__unidentified_Actinobacteria;o__Propionibacteriales;f__Nocardioidaceae;g__Nocardioides	0.00058106	0.916554	0.0707044	0.0222088	0.0318637	0.158041
OTU_310	k__Bacteria;p__Proteobacteria;c__Betaproteobacteria;o__TRA3-20;f__;g__;s__	0.000707495	0.910894	0.0813684	0.0235005	0.0210317	0.199573
OTU_520	k__Bacteria;p__Proteobacteria;c__Deltaproteobacteria;o__Bdellovibrionales;f__Bacteriovoracaceae;g__Peredibacter	0.000912398	0.90301	0.0212967	0	0.0126067	0.0512835
OTU_143	k__Bacteria;p__Verrucomicrobia;c__OPB35_soil_group	0.00111982	0.896156	0.318884	0.0677319	0.288311	0.600609
OTU_53	k__Bacteria;p__Acidobacteria;c__unidentified_Acidobacteria;o__Subgroup_4;f__unidentified_Acidobacteria;g__Blastocatella;s__Acidobacteriaceae_bacterium_WY18	0.00134315	0.889666	0.465973	0.0138015	0.0237274	1.36039
OTU_338	k__Bacteria;p__Proteobacteria;c__Deltaproteobacteria;o__Myxococcales;f__Polyangiaceae;g__Sorangium;s__	0.00135294	0.889399	0.077177	0.0151955	0.00835493	0.207981
OTU_102	k__Bacteria;p__Acidobacteria;c__unidentified_Acidobacteria;o__Subgroup_3;f__unidentified_Acidobacteria;g__Candidatus_Solibacter;s__	0.00145943	0.88657	0.123508	0.0262704	0.0847716	0.259481
OTU_162	k__Bacteria;p__Acidobacteria;c__unidentified_Acidobacteria;o__Subgroup_6;f__;g__;s__	0.00181489	0.878021	0.181182	0.0290163	0.0461498	0.468379
OTU_449	k__Bacteria;p__Proteobacteria;c__Alphaproteobacteria;o__Sphingomonadales;f__Sphingomonadaceae	0.00213893	0.871156	0.0203187	0	0.00276579	0.0581904
OTU_62	k__Bacteria;p__Cyanobacteria;c__Melainabacteria;o__Obscuribacterales;f__;g__;s__	0.00290958	0.857239	0.399185	0.248786	0.171056	0.777712
OTU_628	k__Bacteria;p__Chlorobi;c__Chlorobia;o__Chlorobiales;f__OPB56;g__;s__	0.00313591	0.853629	0.015245	0	0	0.045735
OTU_513	k__Bacteria;p__Bacteroidetes;c__Cytophagia;o__Cytophagales;f__Cytophagaceae;g__Sporocytophaga;s__	0.00314777	0.853445	0.0166392	0.0027603	0.00276162	0.0443955
OTU_535	k__Bacteria;p__Proteobacteria;c__Gammaproteobacteria;o__Xanthomonadales;f__Solimonadaceae;g__;s__	0.00328046	0.851414	0.0180065	0.00414286	0.00276579	0.0471107
OTU_136	k__Bacteria;p__Verrucomicrobia;c__OPB35_soil_group;o__;f__;g__;s__	0.00392191	0.8423	0.195777	0	0	0.587331
OTU_351	k__Bacteria;p__Gemmatimonadetes;c__unidentified_Gemmatimonadetes;o__Gemmatimonadales;f__Gemmatimonadaceae;g__Gemmatimonas;s__	0.00424442	0.83809	0.0521728	0	0.00690196	0.149616
OTU_599	k__Bacteria;p__Verrucomicrobia;c__OPB35_soil_group;o__;f__;g__;s__	0.00439624	0.836182	0.016652	0	0	0.0499561
OTU_283	k__Bacteria;p__Actinobacteria;c__Acidimicrobiia;o__Acidimicrobiales;f__;g__;s__	0.00507461	0.828156	0.0537323	0.0180578	0.0335436	0.109595
OTU_796	k__Bacteria;p__Verrucomicrobia;c__OPB35_soil_group;o__;f__;g__;s__	0.00536777	0.824909	0.0129682	0	0.00141585	0.0374886
OTU_272	k__Bacteria;p__Cyanobacteria;c__Melainabacteria;o__Vampirovibrionales;f__;g__;s__	0.00573887	0.820963	0.077224	0.00966827	0.015294	0.20671
OTU_981	k__Bacteria;p__Acidobacteria;c__unidentified_Acidobacteria;o__Subgroup_6;f__;g__;s__	0.00887654	0.792947	0.0315146	0.0166121	0.018303	0.0596287
OTU_132	k__Bacteria;p__Acidobacteria;c__unidentified_Acidobacteria;o__Acidobacteriales;f__Acidobacteriaceae_.Subgroup_1.;g__;s__	0.0095763	0.787643	0.00785667	0.00554647	0.00276162	0.0152619
OTU_50	k__Bacteria;p__Proteobacteria;c__Alphaproteobacteria;o__Rhodospirillales;f__I-10;g__;s__	0.00968297	0.786858	0.187772	0.0635617	0.0124994	0.487254
OTU_619	k__Bacteria;p__Proteobacteria;c__Alphaproteobacteria;o__Sphingomonadales;f__;g__;s__	0.010367	0.781953	0.0666155	0.0332726	0.0750626	0.0915113
OTU_262	k__Bacteria;p__Cyanobacteria;c__Melainabacteria;o__Obscuribacterales;f__;g__;s__	0.0107215	0.779495	0.0688932	0.00138255	0	0.205297
OTU_452	k__Bacteria;p__Proteobacteria;c__Betaproteobacteria;o__Burkholderiales;f__Oxalobacteraceae;g__Noviherbaspirillum	0.0108017	0.778947	0.039351	0.0027555	0.0210275	0.09427
OTU_750	k__Bacteria;p__Bacteroidetes;c__Sphingobacteriia;o__Sphingobacteriales;f__Sphingobacteriaceae;g__Arcticibacter;s__	0.011081	0.777058	0.0101811	0	0.0013829	0.0291603
OTU_584	k__Bacteria	0.0111336	0.776705	0.0263539	0.0027651	0.0111908	0.0651058
OTU_199	k__Bacteria;p__Gemmatimonadetes;c__unidentified_Gemmatimonadetes;o__Gemmatimonadales;f__Gemmatimonadaceae;g__Gemmatimonas;s__Microcystis_sp._SAG_43.90	0.0145392	0.75593	0.108034	0.0967954	0.0152982	0.212009
OTU_41	k__Bacteria;p__Proteobacteria;c__Deltaproteobacteria;o__Oligoflexales;f__Oligoflexaceae;g__Oligoflexus;s__	0.0151695	0.752453	0.62623	0.381466	0.219092	1.27813
OTU_287	k__Bacteria;p__Actinobacteria;c__unidentified_Actinobacteria;o__Frankiales;f__;g__;s__	0.015219	0.752184	0.19471	0.102468	0.168461	0.313201
OTU_410	k__Bacteria;p__Gemmatimonadetes;c__unidentified_Gemmatimonadetes;o__Gemmatimonadales;f__Gemmatimonadaceae	0.0158818	0.748638	0.0402113	0.01108	0.0165614	0.0929926
OTU_264	k__Bacteria;p__Proteobacteria;c__Alphaproteobacteria;o__Rhodospirillales;f__Rhodospirillaceae;g__;s__	0.0166731	0.744531	0.0170893	0.0138322	0	0.0374358
OTU_43	k__Bacteria;p__Proteobacteria;c__Betaproteobacteria;o__Nitrosomonadales;f__Nitrosomonadaceae;g__Nitrosospira;s__	0.0170905	0.742416	1.65094	0.976665	0.302301	3.67385
OTU_453	k__Bacteria;p__Cyanobacteria;c__Melainabacteria;o__Vampirovibrionales;f__;g__;s__	0.0177707	0.739043	0.0212766	0	0	0.0638299
OTU_548	k__Bacteria;p__Cyanobacteria;c__Chloroplast;o__unidentified_Chloroplast;f__unidentified_Chloroplast;g__unidentified_Chloroplast;s__Chlorella_sp._CC-Bw-9	0.0186504	0.734807	0.0138639	0	0	0.0415916
OTU_1695	k__Bacteria;p__Proteobacteria;c__Betaproteobacteria;o__Burkholderiales;f__Oxalobacteraceae;g__Massilia	0.0193037	0.731745	0.0475732	0.0248461	0.0180431	0.0998304
OTU_531	k__Bacteria;p__Proteobacteria;c__Gammaproteobacteria;o__Xanthomonadales;f__Xanthomonadaceae;g__Lysobacter;s__Lysobacter_brunescens	0.0194107	0.731251	0.0416544	0.0027651	0.00414869	0.118049
OTU_200	k__Bacteria;p__Proteobacteria;c__Betaproteobacteria;o__Burkholderiales;f__Comamonadaceae	0.0204425	0.726571	0.279916	0.31665	0.088957	0.434141
OTU_104	k__Bacteria;p__Verrucomicrobia;c__OPB35_soil_group;o__unidentified_OPB35_soil_group;f__unidentified_OPB35_soil_group;g__unidentified_OPB35_soil_group;s__bacterium_Ellin517	0.0207453	0.725228	0.221438	0.0773705	0.0166194	0.570325
OTU_105	k__Bacteria;p__Proteobacteria;c__Deltaproteobacteria;o__Myxococcales;f__mle1-27;g__unidentified_mle1-27;s__Myxococcales_bacterium_Gsoil_473	0.0209348	0.724394	0.229518	0.0483997	0.0685152	0.57164
OTU_622	k__Bacteria;p__Proteobacteria;c__Deltaproteobacteria;o__Bdellovibrionales;f__Bacteriovoracaceae;g__Peredibacter	0.0228846	0.71609	0.0282866	0.00966346	0.0141585	0.0610379
OTU_113	k__Bacteria;p__Acidobacteria;c__unidentified_Acidobacteria;o__Subgroup_4;f__unidentified_Acidobacteria;g__Blastocatella;s__	0.0241521	0.710942	0.198447	0.0110848	0.0464014	0.537855
OTU_114	k__Bacteria;p__Bacteroidetes;c__Sphingobacteriia;o__Sphingobacteriales;f__Chitinophagaceae;g__Sediminibacterium;s__	0.0249889	0.707642	0.260218	0.117528	0.0555874	0.607539
OTU_193	k__Bacteria;p__Acidobacteria;c__unidentified_Acidobacteria;o__Subgroup_4;f__11-24;g__;s__	0.0307623	0.686667	0.105487	0.0027651	0.0527678	0.260929
OTU_1533	k__Bacteria;p__Proteobacteria;c__Alphaproteobacteria;o__Rhodospirillales;f__Rhodospirillaceae;g__unidentified_Rhodospirillaceae;s__Rhodospirillales_bacterium_WX36	0.0348671	0.673308	0.034252	0.0110848	0.0264064	0.0652648
OTU_488	k__Archaea;p__Thaumarchaeota;c__.SCG.;o__;f__;g__;s__	0.0349364	0.673092	0.0240537	0.00416392	0.0180389	0.0499582
OTU_742	k__Bacteria;p__Armatimonadetes;c__;o__;f__;g__;s__	0.0384419	0.662504	0.00878996	0.00138255	0.0028317	0.0221556
OTU_259	k__Bacteria	0.038791	0.661486	0.0643449	0.0027651	0.0319217	0.158348
OTU_329	k__Bacteria;p__Bacteroidetes;c__Cytophagia;o__Cytophagales;f__Cytophagaceae;g__;s__	0.0399109	0.658259	0.0498948	0.0483292	0.00421459	0.0971406
OTU_675	k__Bacteria;p__Deinococcus-Thermus;c__Deinococci;o__Deinococcales;f__Deinococcaceae	0.0400437	0.65788	0.0143459	0.00414286	0.00279875	0.036096
OTU_597	k__Bacteria;p__Cyanobacteria;c__Melainabacteria;o__Vampirovibrionales;f__;g__;s__	0.0426575	0.650593	0.0111379	0.0027651	0.00704629	0.0236024
OTU_587	k__Bacteria;p__Actinobacteria;c__Acidimicrobiia;o__Acidimicrobiales;f__Acidimicrobiaceae;g__;s__	0.0476863	0.637369	0.0245177	0.00553687	0.026431	0.0415853
OTU_398	k__Bacteria;p__TM6;c__;o__;f__;g__;s__	0.0492064	0.633556	0.0325205	0	0.0365234	0.0610382
OTU_385	k__Bacteria;p__Proteobacteria;c__Betaproteobacteria;o__Burkholderiales;f__Burkholderiaceae;g__Cupriavidus;s__Cupriavidus_taiwanensis	0.0497964	0.632097	0.111741	0.0166006	0.0168129	0.301808
OTU_97	k__Bacteria;p__Bacteroidetes;c__Sphingobacteriia;o__Sphingobacteriales;f__Chitinophagaceae;g__Flavisolibacter;s__	0.0505965	0.630138	0.231111	0.00690649	0.457775	0.228652
OTU_486	k__Bacteria;p__Bacteroidetes;c__Sphingobacteriia;o__Sphingobacteriales;f__Sphingobacteriaceae;g__Arcticibacter;s__	0.0508469	0.629528	0.0255814	0.0027651	0.0725901	0.00138889
OTU_427	k__Bacteria;p__Nitrospirae;c__Nitrospira;o__Nitrospirales;f__Nitrospiraceae;g__unidentified_Nitrospiraceae	0.051481	0.627995	0.0282147	0.0180253	0.0569364	0.00968232
OTU_873	k__Bacteria;p__Proteobacteria;c__Deltaproteobacteria;o__Bdellovibrionales;f__Bdellovibrionaceae;g__;s__	0.0516904	0.627491	0.00981889	0	0.0294567	0
OTU_550	k__Bacteria;p__Proteobacteria;c__Gammaproteobacteria;o__Pseudomonadales;f__Pseudomonadaceae;g__Pseudomonas	0.0524806	0.625602	0.0175387	0.0027651	0	0.049851
OTU_669	k__Bacteria;p__Acidobacteria;c__unidentified_Acidobacteria;o__Subgroup_3;f__unidentified_Acidobacteria;g__Bryobacter;s__	0.0537297	0.622655	0.00968061	0.00138255	0.0262704	0.00138889
OTU_101	k__Bacteria;p__Actinobacteria;c__Acidimicrobiia;o__Acidimicrobiales;f__Acidimicrobiaceae;g__Illumatobacter;s__	0.0547973	0.620173	0.300527	0.404795	0.41075	0.0860363
OTU_1448	k__Bacteria;p__Chloroflexi;c__TK10;o__;f__;g__;s__	0.0549235	0.619881	0.00414844	0.00968786	0.00275744	0
OTU_579	k__Bacteria;p__Bacteroidetes;c__Cytophagia;o__Cytophagales;f__Cytophagaceae;g__Larkinella;s__	0.0564667	0.616354	0.0133845	0.0124386	0.027715	0
OTU_288	k__Bacteria;p__Proteobacteria;c__Deltaproteobacteria;o__Myxococcales;f__Sandaracinaceae;g__Sandaracinus;s__	0.0566693	0.615896	0.0850583	0.0596453	0.0332345	0.162295
OTU_567	k__Bacteria;p__Actinobacteria;c__Acidimicrobiia;o__Acidimicrobiales;f__Iamiaceae;g__Iamia;s__	0.0572499	0.614588	0.0115889	0.0097348	0.0250318	0
OTU_66	k__Bacteria;p__Thermomicrobia;c__unidentified_Thermomicrobia;o__JG30-KF-CM45;f__;g__;s__	0.058074	0.612748	0.397582	0.269986	0.308497	0.614262
OTU_23	k__Bacteria;p__Actinobacteria;c__Acidimicrobiia;o__Acidimicrobiales;f__;g__;s__	0.058354	0.612126	1.91289	2.24472	2.57963	0.914316
OTU_640	k__Bacteria;p__Bacteroidetes;c__Sphingobacteriia;o__Sphingobacteriales;f__Chitinophagaceae	0.0604688	0.607496	0.0163348	0.00413806	0.0448663	0
OTU_270	k__Bacteria;p__Proteobacteria;c__Gammaproteobacteria;o__Xanthomonadales;f__;g__;s__	0.061177	0.60597	0.0788763	0.204629	0.0306089	0.00139127
OTU_525	k__Bacteria;p__Proteobacteria;c__Deltaproteobacteria;o__Myxococcales;f__Haliangiaceae;g__Haliangium;s__	0.061212	0.605895	0.0180039	0.00414766	0	0.0498642
OTU_1461	k__Bacteria;p__Actinobacteria;c__unidentified_Actinobacteria;o__Micrococcales;f__Micrococcaceae;g__Arthrobacter	0.0612902	0.605727	0.074832	0.112213	0.0264022	0.085881
OTU_156	k__Bacteria;p__Chlorobi;c__Chlorobia;o__Chlorobiales;f__OPB56;g__;s__	0.0615691	0.60513	0.13098	0.00552061	0.377731	0.0096884
OTU_779	k__Bacteria;p__Proteobacteria;c__Alphaproteobacteria;o__Rickettsiales;f__unidentified_Rickettsiales;g__Candidatus_Captivus;s__	0.061913	0.604396	0.00924244	0.0263469	0	0.00138043
OTU_626	k__Bacteria;p__Proteobacteria;c__Alphaproteobacteria;o__Caulobacterales;f__Hyphomonadaceae;g__;s__	0.0633025	0.601459	0.0110895	0.0277276	0	0.00554102
OTU_1005	k__Bacteria;p__Actinobacteria;c__Acidimicrobiia;o__Acidimicrobiales;f__;g__;s__	0.0634706	0.601106	0.00923088	0.017998	0.00552323	0.00417142
OTU_534	k__Bacteria;p__Proteobacteria;c__SPOTSOCT00m83;o__;f__;g__;s__	0.0635196	0.601003	0.0242573	0.00972666	0.0616541	0.00139127
OTU_637	k__Bacteria;p__Proteobacteria;c__Betaproteobacteria;o__Burkholderiales;f__Burkholderiaceae;g__Lautropia;s__	0.0638854	0.600239	0.0221724	0.0596028	0.00691448	0
OTU_142	k__Bacteria;p__Acidobacteria;c__unidentified_Acidobacteria;o__Subgroup_6;f__;g__;s__	0.064028	0.599942	0.302332	0.134327	0.22833	0.544338
OTU_823	k__Bacteria;p__Proteobacteria;c__Betaproteobacteria;o__Burkholderiales;f__Comamonadaceae;g__Piscinibacter;s__	0.0650694	0.597784	0.00922678	0.024917	0.0013829	0.00138043
OTU_527	k__Bacteria;p__Proteobacteria;c__Alphaproteobacteria;o__Rhizobiales;f__Rhizobiaceae;g__Rhizobium	0.0651316	0.597656	0.200376	0.475668	0.106059	0.0194008
OTU_1065	k__Bacteria;p__Proteobacteria;c__Betaproteobacteria;o__TRA3-20;f__;g__;s__	0.0675029	0.592832	0.006917	0.0124578	0.00690196	0.00139127
OTU_554	k__Bacteria;p__Chlorobi;c__Chlorobia;o__Chlorobiales;f__OPB56;g__;s__	0.0679769	0.591881	0.0120476	0	0.0194919	0.0166508
OTU_408	k__Bacteria;p__Acidobacteria;c__unidentified_Acidobacteria;o__Subgroup_6;f__;g__;s__	0.0688623	0.590116	0.0582968	0.0359272	0.0363257	0.102638
OTU_967	k__Bacteria;p__Saccharibacteria;c__;o__;f__;g__;s__	0.0704788	0.586934	0.00693205	0.0027651	0.018031	0
OTU_47	k__Bacteria;p__Proteobacteria;c__Alphaproteobacteria;o__Rhizobiales;f__Hyphomicrobiaceae;g__Hyphomicrobium;s__	0.0706269	0.586645	0.545378	0.260207	0.658334	0.717592
OTU_134	k__Bacteria;p__Actinobacteria;c__Acidimicrobiia;o__Acidimicrobiales;f__;g__;s__	0.071051	0.585819	0.210181	0.119139	0.188584	0.322818
OTU_294	k__Bacteria;p__Proteobacteria;c__Deltaproteobacteria;o__GR-WP33-30;f__unidentified_GR-WP33-30;g__unidentified_GR-WP33-30;s__bacterium_enrichment_culture_clone_B126.2011.	0.0712925	0.58535	0.0605047	0.00966827	0.0182246	0.153621
OTU_263	k__Bacteria;p__Proteobacteria;c__Betaproteobacteria;o__Methylophilales;f__Methylophilaceae;g__Methylophilus;s__	0.0715083	0.584932	0.0783253	0.0414966	0.0977616	0.0957176
OTU_518	k__Bacteria;p__Proteobacteria	0.0729564	0.582149	0.0161906	0.0027603	0.00414869	0.0416627
OTU_965	k__Bacteria;p__Proteobacteria;c__Deltaproteobacteria;o__Bdellovibrionales;f__Bdellovibrionaceae;g__Bdellovibrio;s__	0.0730476	0.581975	0.00508387	0.0027651	0	0.0124865
OTU_362	k__Bacteria;p__Bacteroidetes;c__Cytophagia;o__Cytophagales;f__Cytophagaceae;g__;s__	0.0736571	0.580816	0.0354711	0.0870181	0.013841	0.00555423
OTU_225	k__Bacteria;p__Actinobacteria;c__unidentified_Actinobacteria;o__Corynebacteriales;f__Mycobacteriaceae;g__Mycobacterium;s__Mycobacterium_gordonae	0.0737471	0.580645	0.0954167	0.0249089	0.0572214	0.20412
OTU_843	k__Bacteria;p__Bacteroidetes;c__Sphingobacteriia;o__Sphingobacteriales;f__Chitinophagaceae;g__Niastella	0.0740076	0.580152	0.0490927	0.013881	0.133397	0
OTU_801	k__Bacteria;p__Proteobacteria;c__Alphaproteobacteria;o__Rhodospirillales;f__I-10;g__;s__	0.0745364	0.579154	0.00647972	0.00138255	0	0.0180566
OTU_1616	k__Bacteria;p__Proteobacteria;c__Alphaproteobacteria;o__Rhizobiales	0.0754286	0.577482	0.0134013	0.0276226	0.00981209	0.00276932
OTU_57	k__Bacteria;p__Chloroflexi;c__Ktedonobacteria;o__JG30-KF-AS9;f__;g__;s__	0.0781809	0.572404	0.00646063	0	0.00828903	0.0110929
OTU_700	k__Bacteria;p__Proteobacteria;c__Deltaproteobacteria;o__Bdellovibrionales;f__Bdellovibrionaceae;g__Bdellovibrio;s__	0.0786022	0.571637	0.00970419	0.0027651	0.0013829	0.0249646
OTU_422	k__Bacteria;p__Bacteroidetes;c__Sphingobacteriia;o__Sphingobacteriales;f__KD3-93;g__;s__	0.0797032	0.569647	0.0217323	0.0179913	0.0167057	0.0304998
OTU_178	k__Bacteria;p__Verrucomicrobia;c__OPB35_soil_group;o__;f__;g__;s__	0.0808494	0.567593	0.168962	0.0914588	0.00414034	0.411288
OTU_543	k__Bacteria;p__Proteobacteria;c__Alphaproteobacteria	0.0815437	0.566359	0.0142971	0	0	0.0428912
OTU_290	k__Bacteria;p__Saccharibacteria;c__;o__;f__;g__;s__	0.0815477	0.566352	0.0544921	0.00414766	0.0291272	0.130201
OTU_644	k__Bacteria;p__Proteobacteria;c__Betaproteobacteria;o__Neisseriales;f__Neisseriaceae	0.0844913	0.561196	0.0120491	0.0318996	0.00424755	0
OTU_93	k__Bacteria;p__Proteobacteria;c__Alphaproteobacteria;o__DB1-14;f__;g__;s__	0.0858363	0.55888	0.223713	0.0179736	0.00693908	0.646226
OTU_4	k__Bacteria;p__Proteobacteria;c__Alphaproteobacteria;o__Sphingomonadales;f__Sphingomonadaceae;g__Sphingomonas;s__	0.0872326	0.556501	2.80736	1.06878	2.53354	4.81977
OTU_161	k__Bacteria;p__Cyanobacteria;c__ML635J-21;o__;f__;g__;s__	0.0872376	0.556492	0.175416	0.128845	0.0166481	0.380755
OTU_257	k__Bacteria;p__Proteobacteria;c__Alphaproteobacteria;o__Rhizobiales;f__Phyllobacteriaceae;g__Mesorhizobium;s__Mesorhizobium_plurifarium	0.0881364	0.554974	0.559198	0.61332	0.396982	0.667291
OTU_394	k__Bacteria;p__Proteobacteria;c__Betaproteobacteria;o__Burkholderiales;f__Oxalobacteraceae	0.0901364	0.551633	0.122543	0.019382	0.176455	0.171793
OTU_1327	k__Bacteria;p__Proteobacteria;c__Alphaproteobacteria;o__Rhizobiales;f__unidentified_Rhizobiales;g__Rhizomicrobium;s__	0.0902067	0.551517	0.00739436	0.00139069	0.00275744	0.0180349
OTU_15	k__Bacteria;p__Proteobacteria;c__Gammaproteobacteria;o__Xanthomonadales;f__Solimonadaceae;g__Polycyclovorans;s__	0.0912098	0.54986	1.44764	1.21848	0.129028	2.99542
OTU_1038	k__Bacteria;p__Firmicutes;c__Bacilli;o__Bacillales;f__Sporolactobacillaceae;g__Sporolactobacillus;s__	0.0920911	0.548415	0.00464298	0	0.00421042	0.00971852
OTU_1306	k__Bacteria;p__Actinobacteria;c__unidentified_Actinobacteria;o__Frankiales;f__Sporichthyaceae;g__Sporichthya	0.0928074	0.547248	0.00880788	0.00415912	0.00700499	0.0152595
OTU_307	k__Bacteria;p__Acidobacteria;c__unidentified_Acidobacteria;o__Subgroup_6;f__;g__;s__	0.0939472	0.545402	0.0069069	0.0179429	0	0.00277778
OTU_26	k__Bacteria;p__Bacteroidetes;c__Sphingobacteriia;o__Sphingobacteriales;f__env.OPS_17;g__;s__	0.0945258	0.54447	0.795412	0.455259	0.149405	1.78157
OTU_1252	k__Bacteria;p__Chloroflexi;c__Ktedonobacteria;o__C0119;f__;g__;s__	0.0946406	0.544286	0.0326252	0.00414766	0.0868257	0.00690217
OTU_419	k__Bacteria;p__Proteobacteria;c__Betaproteobacteria;o__SC-I-84;f__;g__;s__	0.0982237	0.538606	0.0457591	0.0290795	0.102665	0.00553257
OTU_616	k__Bacteria;p__Proteobacteria;c__Alphaproteobacteria;o__Caulobacterales;f__Hyphomonadaceae;g__Woodsholea;s__	0.0989736	0.537435	0.0203014	0.0567597	0.00414451	0
OTU_703	k__Bacteria;p__Actinobacteria;c__Thermoleophilia;o__Solirubrobacterales;f__Patulibacteraceae;g__Patulibacter;s__	0.10017	0.535578	0.0260871	0.00969266	0.0602257	0.00834284
OTU_413	k__Bacteria;p__Chloroflexi;c__S085;o__;f__;g__;s__	0.101491	0.533545	0.023619	0.0415343	0.0140513	0.0152714
OTU_86	k__Bacteria;p__Proteobacteria;c__Betaproteobacteria;o__Burkholderiales;f__Comamonadaceae;g__Acidovorax;s__Acidovorax_delafieldii	0.102134	0.532562	0.279221	0.245945	0.563984	0.0277329
OTU_144	k__Bacteria;p__Bacteroidetes;c__Sphingobacteriia;o__Sphingobacteriales;f__Chitinophagaceae	0.102263	0.532366	0.166604	0.00551101	0.488744	0.00555793
OTU_517	k__Bacteria;p__Actinobacteria;c__Acidimicrobiia;o__Acidimicrobiales	0.102389	0.532174	0.0296736	0.00138255	0.0140471	0.0735913
OTU_495	k__Bacteria;p__Bacteroidetes;c__Flavobacteriia;o__Flavobacteriales;f__Cryomorphaceae;g__Fluviicola	0.104307	0.529271	0.0184729	0.034579	0.0194594	0.00138043
OTU_12	k__Bacteria;p__Proteobacteria;c__Alphaproteobacteria;o__Rhizobiales;f__Bradyrhizobiaceae;g__Bradyrhizobium	0.104994	0.52824	1.22639	0.981316	1.07434	1.62352
OTU_582	k__Bacteria;p__Proteobacteria;c__Alphaproteobacteria;o__Sphingomonadales;f__Sphingomonadaceae;g__Novosphingobium;s__	0.105489	0.527499	0.697425	0.0995875	1.67535	0.317338
OTU_38	k__Bacteria;p__Proteobacteria;c__Alphaproteobacteria;o__Rhizobiales;f__Xanthobacteraceae;g__Pseudolabrys;s__	0.105493	0.527493	0.0688814	0.103651	0.0641725	0.038821
OTU_243	k__Bacteria;p__Proteobacteria;c__Betaproteobacteria;o__Nitrosomonadales;f__Nitrosomonadaceae;g__;s__	0.105648	0.527263	0.0853517	0.204687	0.0180473	0.0333212
OTU_1013	k__Bacteria;p__TM6;c__;o__;f__;g__;s__	0.111472	0.51873	0.00461233	0.013837	0	0
OTU_421	k__Bacteria;p__Actinobacteria;c__unidentified_Actinobacteria;o__Micrococcales;f__Microbacteriaceae	0.113121	0.516369	0.890581	0.952501	1.61789	0.101355
OTU_964	k__Bacteria;p__Bacteroidetes;c__Sphingobacteriia;o__Sphingobacteriales;f__Chitinophagaceae;g__;s__	0.11325	0.516185	0.00462588	0.0138777	0	0
OTU_210	k__Bacteria;p__Proteobacteria;c__Betaproteobacteria;o__Burkholderiales;f__Oxalobacteraceae;g__Herbaspirillum	0.113877	0.515294	0.0965039	0.0913139	0.195437	0.00276087
OTU_919	k__Bacteria;p__Actinobacteria;c__unidentified_Actinobacteria;o__Micrococcales;f__Cellulomonadaceae;g__Actinotalea;s__	0.114037	0.515066	0.00877964	0.00137775	0.00275744	0.0222037
OTU_607	k__Bacteria;p__Bacteroidetes;c__Sphingobacteriia;o__Sphingobacteriales;f__Chitinophagaceae;g__Flavisolibacter;s__	0.11444	0.514496	0.0110906	0	0.0332717	0
OTU_334	k__Bacteria;p__Proteobacteria;c__Alphaproteobacteria;o__Rhizobiales;f__Bradyrhizobiaceae;g__Bosea;s__	0.114479	0.514441	0.0591199	0.00971853	0.116512	0.0511292
OTU_676	k__Bacteria;p__Actinobacteria;c__Acidimicrobiia;o__Acidimicrobiales;f__Acidimicrobiaceae;g__CL500-29_marine_group;s__	0.115174	0.51346	0.0246183	0.0332304	0.0392442	0.00138043
OTU_855	k__Bacteria;p__Chlamydiae;c__unidentified_Chlamydiae;o__Chlamydiales;f__Parachlamydiaceae	0.116037	0.512248	0.00790695	0.00690796	0.0168129	0
OTU_181	k__Bacteria;p__Proteobacteria;c__Deltaproteobacteria;o__Bdellovibrionales;f__Bdellovibrionaceae;g__;s__	0.116048	0.512234	0.113239	0.101085	0.077737	0.160895
OTU_491	k__Bacteria;p__Chlamydiae;c__unidentified_Chlamydiae;o__Chlamydiales;f__Simkaniaceae;g__Candidatus_Rhabdochlamydia	0.117078	0.510794	0.0327654	0.0360018	0.0013829	0.0609116
OTU_596	k__Bacteria;p__Gemmatimonadetes;c__unidentified_Gemmatimonadetes;o__Gemmatimonadales;f__Gemmatimonadaceae;g__Gemmatimonas;s__	0.117653	0.509994	0.0156786	0	0	0.0470359
OTU_9	k__Bacteria;p__Bacteroidetes;c__Sphingobacteriia;o__Sphingobacteriales;f__Sphingobacteriaceae;g__Mucilaginibacter	0.117831	0.509747	0.00790869	0.00554647	0.015397	0.00278253
OTU_182	k__Bacteria;p__Actinobacteria;c__Acidimicrobiia;o__Acidimicrobiales;f__;g__;s__	0.118024	0.50948	0.113604	0.0346633	0.0252834	0.280866
OTU_129	k__Bacteria;p__Proteobacteria;c__Deltaproteobacteria;o__Myxococcales;f__Blfdi19;g__;s__	0.118036	0.509463	0.163406	0.132898	0.0532871	0.304032
OTU_996	k__Bacteria;p__Proteobacteria;c__Alphaproteobacteria;o__Rhodospirillales;f__Acetobacteraceae	0.12094	0.505473	0.0175841	0.00692089	0.0208957	0.0249358
OTU_867	k__Bacteria;p__Actinobacteria;c__unidentified_Actinobacteria;o__Streptomycetales;f__Streptomycetaceae;g__Streptomyces	0.122135	0.50385	1.09733	0.85877	2.37497	0.0582662
OTU_96	k__Bacteria;p__Proteobacteria;c__Alphaproteobacteria;o__Sphingomonadales;f__Sphingomonadaceae;g__Sphingopyxis	0.123833	0.50156	0.329029	0.284149	0.187288	0.515651
OTU_11	k__Bacteria;p__Firmicutes;c__Bacilli;o__Bacillales;f__Alicyclobacillaceae;g__Tumebacillus;s__	0.124705	0.500394	0.0360435	0.0359634	0.0485694	0.0235976
OTU_490	k__Bacteria;p__Proteobacteria;c__Gammaproteobacteria;o__Xanthomonadales;f__unidentified_Xanthomonadales;g__Acidibacter;s__	0.12545	0.499401	0.012969	0.00970226	0.0264268	0.00277778
OTU_897	k__Bacteria;p__Proteobacteria;c__Deltaproteobacteria;o__Bdellovibrionales;f__Bdellovibrionaceae;g__Bdellovibrio	0.125846	0.498875	0.00557719	0.00413326	0.0125983	0
OTU_369	k__Bacteria;p__Proteobacteria;c__Alphaproteobacteria	0.127148	0.497152	0.0401083	0.0138111	0.00276162	0.103752
OTU_479	k__Bacteria;p__Proteobacteria;c__Alphaproteobacteria;o__Caulobacterales;f__Hyphomonadaceae;g__Hirschia;s__	0.127225	0.49705	0.0472968	0.00138255	0.104386	0.0361217
OTU_63	k__Bacteria;p__Actinobacteria;c__unidentified_Actinobacteria;o__Micrococcales;f__Microbacteriaceae;g__Lysinimonas;s__	0.128538	0.495326	0.959095	1.16529	1.17809	0.533909
OTU_1751	k__Bacteria;p__Proteobacteria;c__Alphaproteobacteria;o__Sphingomonadales;f__Sphingomonadaceae;g__Sphingomonas;s__Sphingomonas_faeni	0.130554	0.492702	0.244519	0.465913	0.0404785	0.227166
OTU_1128	k__Bacteria;p__Gemmatimonadetes;c__unidentified_Gemmatimonadetes;o__Gemmatimonadales;f__Gemmatimonadaceae	0.132394	0.490329	0.00509038	0	0.0138907	0.00138043
OTU_528	k__Bacteria;p__Proteobacteria;c__Alphaproteobacteria;o__Rhodobacterales;f__Rhodobacteraceae;g__Paracocccus	0.134179	0.48805	0.0246364	0.024961	0.0461874	0.00276087
OTU_127	k__Bacteria;p__Actinobacteria;c__unidentified_Actinobacteria;o__Micromonosporales;f__Micromonosporaceae	0.137327	0.484076	0.0161946	0.0137871	0.0334077	0.00138889
OTU_13	k__Bacteria;p__Actinobacteria;c__unidentified_Actinobacteria;o__Streptomycetales;f__Streptomycetaceae;g__Streptomyces;s__Streptomyces_scabiei	0.137977	0.483264	1.50072	2.24327	2.22419	0.0347085
OTU_309	k__Bacteria;p__Acidobacteria;c__unidentified_Acidobacteria;o__Subgroup_3;f__unidentified_Acidobacteria;g__Candidatus_Solibacter;s__	0.139578	0.481273	0.0336988	0.0151874	0.0373828	0.0485263
OTU_1743	k__Bacteria;p__Proteobacteria;c__Alphaproteobacteria;o__Sphingomonadales	0.140289	0.480394	0.0753622	0.185836	0.0291643	0.0110868
OTU_807	k__Bacteria;p__Proteobacteria;c__Alphaproteobacteria;o__Rhizobiales	0.140996	0.479523	0.0170919	0.0152717	0.0346128	0.00139127
OTU_81	k__Bacteria;p__Proteobacteria;c__Alphaproteobacteria;o__Rhizobiales;f__Phyllobacteriaceae;g__Chelativorans;s__Chelativorans_sp._BNC1	0.144105	0.475724	0.250693	0.0318283	0.389494	0.330756
OTU_275	k__Bacteria;p__Proteobacteria;c__Alphaproteobacteria;o__Rhodospirillales;f__Rhodospirillaceae;g__Azospirillum;s__Azospirillum_sp._taihu16	0.145943	0.473504	0.0666896	0.146527	0.04939	0.00415213
OTU_35	k__Bacteria;p__Proteobacteria;c__Alphaproteobacteria;o__Caulobacterales;f__Caulobacteraceae;g__Caulobacter;s__Caulobacter_sp.	0.14673	0.47256	0.626047	0.156611	1.61754	0.103993
OTU_529	k__Bacteria;p__TM6;c__;o__;f__;g__;s__	0.147252	0.471935	0.0171806	0.00138255	0.00707925	0.0430801
OTU_76	k__Bacteria;p__Proteobacteria;c__Gammaproteobacteria;o__Xanthomonadales;f__Xanthomonadaceae;g__Xanthomonas	0.147434	0.471717	0.319073	0.492342	0.449597	0.0152812
OTU_1053	k__Bacteria;p__Proteobacteria;c__Deltaproteobacteria;o__Myxococcales;f__Haliangiaceae;g__Haliangium;s__	0.147677	0.471428	0.00693468	0.0027651	0.0180389	0
OTU_281	k__Bacteria;p__Actinobacteria;c__unidentified_Actinobacteria;o__PeM15;f__;g__;s__	0.148341	0.470637	0.0776124	0.105239	0.105402	0.0221955
OTU_811	k__Bacteria;p__Cyanobacteria;c__Melainabacteria;o__Obscuribacterales;f__;g__;s__	0.149135	0.469694	0.0050944	0.0124515	0.0028317	0
OTU_312	k__Bacteria;p__Chloroflexi;c__Caldilineae;o__Caldilineales;f__Caldilineaceae;g__;s__	0.149604	0.469138	0.0429708	0.0762412	0.0222043	0.030467
OTU_297	k__Bacteria;p__Proteobacteria;c__Deltaproteobacteria;o__GR-WP33-30;f__unidentified_GR-WP33-30;g__unidentified_GR-WP33-30;s__bacterium_enrichment_culture_clone_B30.2011.	0.150092	0.468562	0.0449784	0.00689836	0.0516281	0.0764087
OTU_91	k__Bacteria;p__Proteobacteria;c__Alphaproteobacteria;o__Rhizobiales	0.151055	0.467428	0.0281502	0.0414726	0.0290979	0.0138802
OTU_1044	k__Bacteria;p__Planctomycetes;c__Phycisphaerae;o__WD2101_soil_group;f__;g__;s__	0.151363	0.467067	0.00513351	0.0027651	0.0126354	0
OTU_1134	k__Bacteria;p__Proteobacteria;c__Betaproteobacteria;o__Burkholderiales;f__Comamonadaceae	0.153243	0.464869	0.0597033	0.0719128	0.0947285	0.0124686
OTU_324	k__Bacteria;p__Chloroflexi;c__KD4-96;o__;f__;g__;s__	0.153914	0.464089	0.1167	0.0733349	0.110487	0.166279
OTU_228	k__Bacteria;p__Nitrospirae;c__Nitrospira;o__Nitrospirales;f__Nitrospiraceae	0.156224	0.461422	0.0985388	0.0691432	0.168212	0.0582607
OTU_507	k__Bacteria;p__Actinobacteria;c__Thermoleophilia;o__Gaiellales	0.156584	0.461008	0.00369375	0	0.00969235	0.00138889
OTU_216	k__Bacteria	0.156772	0.460792	0.101794	0.0303921	0.272208	0.00278015
OTU_119	k__Bacteria;p__Proteobacteria;c__Alphaproteobacteria;o__Sphingomonadales;f__7B-8;g__;s__	0.156921	0.460622	0.182477	0.102485	0.242425	0.202521
OTU_560	k__Bacteria;p__Proteobacteria;c__Deltaproteobacteria;o__Bdellovibrionales;f__Bdellovibrionaceae;g__Bdellovibrio;s__	0.157719	0.459709	0.0171223	0.00967973	0.0028317	0.0388556
OTU_426	k__Bacteria;p__Bacteroidetes;c__Cytophagia;o__Cytophagales;f__Cytophagaceae;g__Spirosoma;s__Spirosoma_panaciterrae	0.157756	0.459667	0.0310001	0.0791068	0	0.0138936
OTU_574	k__Bacteria;p__Thermomicrobia;c__unidentified_Thermomicrobia;o__JG30-KF-CM45;f__;g__;s__	0.158645	0.458654	0.018941	0.0430122	0.00828068	0.00553019
OTU_176	k__Bacteria;p__Proteobacteria;c__Alphaproteobacteria;o__Caulobacterales;f__Caulobacteraceae;g__Asticcacaulis	0.159352	0.457851	0.100351	0.102442	0.19861	0
OTU_1353	k__Bacteria;p__Proteobacteria;c__Alphaproteobacteria;o__Rickettsiales;f__TK34;g__;s__	0.159748	0.457402	0.00553332	0.0152195	0	0.00138043
OTU_636	k__Bacteria;p__Firmicutes;c__Bacilli;o__Bacillales;f__Paenibacillaceae;g__Paenibacillus;s__Paenibacillus_alginolyticus	0.160066	0.457042	0.0222231	0.0124999	0.00551906	0.0486502
OTU_497	k__Bacteria;p__Proteobacteria;c__Alphaproteobacteria;o__Rhizobiales;f__Methylocystaceae;g__Pleomorphomonas;s__	0.160204	0.456886	0.0562508	0.132848	0.0220679	0.0138368
OTU_179	k__Bacteria;p__Actinobacteria;c__unidentified_Actinobacteria;o__Frankiales;f__Sporichthyaceae;g__Sporichthya	0.16216	0.454685	0.12813	0.0705383	0.175252	0.138601
OTU_61	k__Bacteria;p__Acidobacteria;c__unidentified_Acidobacteria;o__Subgroup_3;f__unidentified_Acidobacteria;g__Bryobacter;s__	0.162588	0.454205	0.431605	0.332181	0.797387	0.165248
OTU_988	k__Bacteria;p__Proteobacteria;c__Deltaproteobacteria;o__Bdellovibrionales;f__Bacteriovoracaceae;g__Peredibacter	0.164312	0.452283	0.00748086	0	0.0196817	0.00276087
OTU_90	k__Bacteria;p__Firmicutes;c__Bacilli;o__Bacillales;f__Bacillaceae;g__Bacillus;s__Bacillus_aryabhattai	0.164909	0.451621	0.23846	0.0843827	0.621286	0.00971244
OTU_643	k__Bacteria;p__Proteobacteria;c__Alphaproteobacteria;o__Rhizobiales;f__MNG7;g__;s__	0.169468	0.446612	0.027731	0.0429604	0.0235747	0.0166579
OTU_404	k__Bacteria;p__Proteobacteria;c__Alphaproteobacteria;o__Rhodospirillales;f__Acetobacteraceae	0.170186	0.445833	0.0551458	0.0998311	0.0406308	0.0249757
OTU_1003	k__Bacteria;p__Proteobacteria;c__Alphaproteobacteria;o__Rickettsiales;f__Holosporaceae;g__;s__	0.170909	0.445048	0.00415742	0.00970226	0.00137872	0.00139127
OTU_260	k__Bacteria;p__Proteobacteria;c__Alphaproteobacteria;o__Rhizobiales;f__Hyphomicrobiaceae;g__Devosia;s__Devosia_riboflavina	0.171162	0.444775	0.123268	0.257272	0.0168913	0.0956415
OTU_201	k__Bacteria;p__Bacteroidetes;c__Sphingobacteriia;o__Sphingobacteriales;f__Chitinophagaceae;g__Flavitalea;s__	0.171886	0.443993	0.0978398	0.0693639	0.167331	0.0568247
OTU_376	k__Bacteria;p__Cyanobacteria;c__ML635J-21;o__;f__;g__;s__	0.172594	0.443231	0.0440629	0.0027555	0.0505088	0.0789243
OTU_120	k__Bacteria;p__Proteobacteria;c__Gammaproteobacteria;o__Xanthomonadales;f__Xanthomonadaceae;g__Pseudoxanthomonas;s__Pseudoxanthomonas_mexicana	0.174752	0.440919	0.259182	0.566059	0.157351	0.054136
OTU_557	k__Bacteria;p__Proteobacteria;c__Gammaproteobacteria;o__Xanthomonadales;f__Xanthomonadaceae;g__Lysobacter	0.1774	0.43811	0.0129472	0.0347054	0.00413616	0
OTU_27	k__Bacteria;p__Chloroflexi;c__Ktedonobacteria;o__C0119;f__;g__;s__	0.178511	0.436939	0.75567	0.158928	1.92778	0.180301
OTU_447	k__Bacteria;p__Cyanobacteria;c__ML635J-21;o__;f__;g__;s__	0.179038	0.436386	0.0325408	0.00137775	0.0670864	0.0291582
OTU_48	k__Bacteria;p__Proteobacteria;c__Alphaproteobacteria;o__Sphingomonadales;f__Sphingomonadaceae;g__Sphingomonas	0.179908	0.435474	1.69707	0.764964	2.6855	1.64074
OTU_595	k__Bacteria;p__Bacteroidetes;c__Cytophagia;o__Cytophagales;f__Cytophagaceae	0.180201	0.435169	0.0162391	0.0360736	0.0126438	0
OTU_971	k__Bacteria;p__Chloroflexi;c__Anaerolineae;o__Anaerolineales;f__Anaerolineaceae;g__;s__	0.18087	0.43447	0.00650937	0.0138647	0.0056634	0
OTU_689	k__Bacteria;p__Bacteroidetes;c__Sphingobacteriia;o__Sphingobacteriales;f__Chitinophagaceae;g__Parasegetibacter;s__Parasegetibacter_luojiensis	0.180927	0.434411	0.0190687	0	0.0322884	0.0249178
OTU_140	k__Bacteria;p__Bacteroidetes;c__Sphingobacteriia;o__Sphingobacteriales;f__Chitinophagaceae	0.181111	0.434219	0.173861	0.319014	0.19286	0.00970769
OTU_761	k__Bacteria;p__Actinobacteria;c__Acidimicrobiia;o__Acidimicrobiales;f__;g__;s__	0.181315	0.434007	0.00601497	0.0180449	0	0
OTU_475	k__Bacteria;p__Proteobacteria;c__Deltaproteobacteria;o__Desulfuromonadales;f__GR-WP33-58;g__;s__	0.182535	0.43274	0.0212826	0.00692903	0.00276162	0.0541571
OTU_835	k__Bacteria;p__Thermomicrobia;c__unidentified_Thermomicrobia;o__JG30-KF-CM45;f__;g__;s__	0.184138	0.431084	0.0194635	0.0194064	0.0292548	0.00972935
OTU_822	k__Bacteria;p__Proteobacteria;c__Alphaproteobacteria;o__Rhodobacterales;f__Rhodobacteraceae;g__Rubellimicrobium;s__	0.184529	0.430682	0.0121992	0	0.0365977	0
OTU_932	k__Bacteria;p__Gemmatimonadetes;c__unidentified_Gemmatimonadetes;o__AT425-EubC11_terrestrial_group;f__;g__;s__	0.18475	0.430455	0.0148106	0.0305012	0.00421459	0.00971614
OTU_957	k__Bacteria;p__Proteobacteria;c__Gammaproteobacteria	0.185953	0.429221	0.00414862	0.00829718	0.00414869	0
OTU_1073	k__Bacteria;p__Planctomycetes;c__Phycisphaerae;o__WD2101_soil_group;f__;g__;s__	0.186365	0.428801	0.00414877	0.0124463	0	0
OTU_739	k__Bacteria;p__Proteobacteria;c__Betaproteobacteria;o__Burkholderiales;f__Alcaligenaceae	0.190427	0.42468	0.0245444	0.00829718	0.0362347	0.0291014
OTU_45	k__Bacteria;p__Chloroflexi;c__Ktedonobacteria;o__Ktedonobacterales;f__Thermosporotrichaceae;g__;s__	0.191235	0.423868	0.00692765	0.00415579	0.0138494	0.00277778
OTU_1552	k__Bacteria;p__Proteobacteria;c__Alphaproteobacteria;o__Rhizobiales;f__Xanthobacteraceae;g__Labrys;s__	0.191772	0.423329	0.0138452	0.0263029	0.0082765	0.00695633
OTU_515	k__Bacteria;p__Saccharibacteria;c__;o__;f__;g__;s__	0.192098	0.423002	0.0175605	0.0346259	0	0.0180556
OTU_20	k__Bacteria;p__Gemmatimonadetes;c__unidentified_Gemmatimonadetes;o__Gemmatimonadales;f__Gemmatimonadaceae;g__Gemmatimonas;s__	0.193512	0.42159	0.0111027	0.0097056	0.00276579	0.0208368
OTU_731	k__Bacteria;p__Chloroflexi;c__Caldilineae;o__Caldilineales;f__Caldilineaceae;g__;s__	0.194942	0.420169	0.0157911	0.00691129	0.0265962	0.0138659
OTU_937	k__Bacteria;p__Proteobacteria;c__Betaproteobacteria;o__Burkholderiales;f__Comamonadaceae;g__Variovorax;s__Variovorax_paradoxus	0.200044	0.415154	0.0462907	0.0137775	0.118156	0.00693837
OTU_744	k__Bacteria;p__Chloroflexi;c__Chloroflexia;o__Kallotenuales;f__AKIW781;g__;s__	0.201466	0.413771	0.0124842	0.00278137	0.0263238	0.00834759
OTU_232	k__Bacteria;p__Cyanobacteria;c__Chloroplast;o__unidentified_Chloroplast;f__unidentified_Chloroplast;g__unidentified_Chloroplast;s__Watanabea_reniformis	0.205757	0.409638	0.0757526	0.00414286	0.153772	0.0693427
OTU_1366	k__Bacteria;p__Actinobacteria;c__unidentified_Actinobacteria;o__Frankiales;f__Geodermatophilaceae;g__Modestobacter;s__	0.207954	0.407545	0.0462577	0.0180138	0.0347655	0.0859938
OTU_1054	k__Bacteria;p__Proteobacteria;c__Alphaproteobacteria;o__Caulobacterales;f__Caulobacteraceae;g__Caulobacter;s__	0.208165	0.407344	0.0975934	0.0869657	0.18916	0.0166545
OTU_68	k__Bacteria;p__Proteobacteria;c__Alphaproteobacteria;o__Rhodobacterales;f__Rhodobacteraceae;g__Rhodobacter;s__	0.209299	0.40627	0.307321	0.0554263	0.779145	0.0873916
OTU_411	k__Bacteria;p__Actinobacteria;c__unidentified_Actinobacteria;o__Propionibacteriales;f__Nocardioidaceae;g__Aeromicrobium;s__	0.210957	0.404706	0.0384645	0.0610098	0.0447015	0.00968232
OTU_313	k__Bacteria;p__Actinobacteria;c__Thermoleophilia;o__Gaiellales;f__;g__;s__	0.211645	0.40406	0.00463099	0.0027555	0.00835493	0.00278253
OTU_139	k__Bacteria;p__Proteobacteria;c__Alphaproteobacteria;o__Rhizobiales;f__1174-901-12;g__;s__	0.213013	0.402779	0.00692272	0.00968453	0.00969235	0.00139127
OTU_780	k__Bacteria;p__Chlamydiae;c__unidentified_Chlamydiae;o__Chlamydiales;f__Parachlamydiaceae;g__Candidatus_Metachlamydia;s__Chlamydia_sp._Rubis	0.214316	0.401563	0.011084	0.0222055	0.0110465	0
OTU_112	k__Bacteria;p__Acidobacteria;c__unidentified_Acidobacteria;o__Acidobacteriales;f__Acidobacteriaceae_.Subgroup_1.;g__;s__	0.216324	0.3997	0.00462449	0.00276844	0	0.011105
OTU_992	k__Bacteria;p__Proteobacteria;c__Alphaproteobacteria;o__Rhizobiales;f__unidentified_Rhizobiales;g__Phreatobacter;s__	0.221961	0.394531	0.00415976	0	0.00279457	0.0096847
OTU_60	k__Bacteria;p__Firmicutes;c__Bacilli;o__Bacillales;f__Alicyclobacillaceae;g__Tumebacillus	0.222923	0.393657	0.0101678	0.0124563	0.0124953	0.00555185
OTU_348	k__Bacteria	0.222954	0.393629	0.0346886	0.00414286	0.0957709	0.00415213
OTU_341	k__Bacteria;p__Bacteroidetes;c__Cytophagia;o__Cytophagales;f__Cytophagaceae;g__Dyadobacter	0.224385	0.392335	0.0490358	0.106668	0.0251845	0.0152548
OTU_423	k__Bacteria;p__Proteobacteria;c__Alphaproteobacteria;o__Rhodobacterales;f__Rhodobacteraceae;g__Rubellimicrobium;s__	0.224575	0.392163	0.0482738	0.0318102	0.0922143	0.0207969
OTU_573	k__Bacteria;p__Proteobacteria;c__Alphaproteobacteria;o__Rhodospirillales	0.227333	0.389685	0.0152362	0.0110508	0.0028317	0.0318261
OTU_578	k__Bacteria;p__Proteobacteria;c__Betaproteobacteria;o__Burkholderiales;f__Oxalobacteraceae;g__Paucimonas	0.228073	0.389024	0.0213688	0.00551581	0.0225051	0.0360855
OTU_851	k__Bacteria;p__Actinobacteria;c__Acidimicrobiia;o__Acidimicrobiales;f__unidentified_Acidimicrobiales;g__Candidatus_Microthrix;s__	0.22825	0.388865	0.00601095	0.00690796	0.0111249	0
OTU_124	k__Bacteria;p__Cyanobacteria;c__unidentified_Cyanobacteria;o__SubsectionIII;f__FamilyI;g__Leptolyngbya;s__Leptolyngbya_boryana	0.228444	0.388692	0.154069	0.0760404	0.31667	0.0694975
OTU_187	k__Bacteria;p__Bacteroidetes;c__Sphingobacteriia;o__Sphingobacteriales;f__Sphingobacteriaceae;g__Mucilaginibacter;s__	0.228822	0.388356	0.112343	0.00138255	0.335645	0
OTU_1872	k__Bacteria;p__Gemmatimonadetes;c__unidentified_Gemmatimonadetes;o__AT425-EubC11_terrestrial_group;f__;g__;s__	0.229249	0.387975	0.00371667	0	0.00697621	0.0041738
OTU_46	k__Bacteria;p__Proteobacteria;c__Alphaproteobacteria;o__Rhodospirillales;f__I-10;g__;s__	0.230957	0.386459	0.0157557	0.0110929	0.0125695	0.0236048
OTU_245	k__Bacteria;p__Actinobacteria;c__unidentified_Actinobacteria;o__Micrococcales;f__Microbacteriaceae;g__Microbacterium;s__Microbacterium_flavescens	0.231356	0.386105	0.186339	0.272926	0.186201	0.0998903
OTU_1361	k__Bacteria;p__Thermomicrobia;c__unidentified_Thermomicrobia;o__JG30-KF-CM45;f__;g__;s__	0.234888	0.382997	0.0374116	0.0401465	0.0499026	0.0221858
OTU_391	k__Bacteria;p__Actinobacteria;c__unidentified_Actinobacteria;o__Pseudonocardiales;f__Pseudonocardiaceae;g__Pseudonocardia;s__Pseudonocardia_carboxydivorans	0.235611	0.382365	0.0510221	0.0790351	0.061564	0.0124672
OTU_694	k__Bacteria;p__Actinobacteria;c__Acidimicrobiia;o__Acidimicrobiales	0.236156	0.381889	0.0129614	0.0388841	0	0
OTU_65	k__Bacteria;p__Proteobacteria;c__Alphaproteobacteria;o__Sphingomonadales;f__Sphingomonadaceae;g__Sphingosinicella;s__	0.239394	0.379077	0.895109	1.25756	0.899677	0.528089
OTU_1029	k__Bacteria;p__Proteobacteria;c__Alphaproteobacteria;o__Rhodospirillales;f__MNC12;g__;s__	0.240171	0.378406	0.00460021	0.0124094	0	0.00139127
OTU_882	k__Bacteria;p__Proteobacteria;c__Alphaproteobacteria;o__Rhodospirillales;f__unidentified_Rhodospirillales;g__Candidatus_Alysiosphaera;s__	0.240203	0.378379	0.00460251	0.00139069	0.0124168	0
OTU_454	k__Bacteria;p__Acidobacteria;c__unidentified_Acidobacteria;o__Subgroup_6;f__unidentified_Acidobacteria;g__unidentified_Acidobacteria;s__bacterium_enrichment_culture_clone_DSR_54	0.24113	0.37758	0.0315124	0.0193609	0.0404906	0.0346858
OTU_845	k__Bacteria;p__Proteobacteria;c__Alphaproteobacteria;o__Rhodospirillales;f__Rhodospirillaceae	0.243743	0.37534	0.00599825	0.00553834	0	0.0124564
OTU_64	k__Bacteria;p__Acidobacteria;c__unidentified_Acidobacteria;o__Acidobacteriales;f__Acidobacteriaceae_.Subgroup_1.;g__Granulicella	0.24421	0.374941	0.0153061	0.00971853	0.0236903	0.0125095
OTU_445	k__Bacteria;p__Actinobacteria;c__Acidimicrobiia;o__Acidimicrobiales;f__;g__;s__	0.245973	0.373441	0.0439684	0.0235005	0.0166481	0.0917567
OTU_153	k__Bacteria;p__Elusimicrobia;c__unidentified_Elusimicrobia;o__Lineage_IV;f__;g__;s__	0.247363	0.372262	0.130111	0.13138	0.0167553	0.242197
OTU_1269	k__Bacteria;p__Actinobacteria;c__Thermoleophilia;o__Solirubrobacterales;f__Patulibacteraceae;g__Patulibacter;s__	0.247667	0.372005	0.00373434	0.00138255	0.00842919	0.00139127
OTU_1112	k__Bacteria;p__Bacteroidetes;c__Flavobacteriia;o__Flavobacteriales;f__Flavobacteriaceae;g__Flavobacterium	0.248271	0.371495	0.00371488	0.00278137	0.00836328	0
OTU_42	k__Bacteria;p__Acidobacteria;c__unidentified_Acidobacteria;o__Subgroup_3;f__unidentified_Acidobacteria;g__Candidatus_Solibacter;s__	0.248698	0.371135	0.0102009	0.00554167	0.015327	0.00973411
OTU_562	k__Bacteria;p__Proteobacteria;c__Gammaproteobacteria;o__Xanthomonadales;f__Solimonadaceae	0.249004	0.370877	0.0125335	0.0166169	0.0168254	0.00415821
OTU_33	k__Bacteria;p__Cyanobacteria;c__Chloroplast;o__unidentified_Chloroplast;f__unidentified_Chloroplast;g__unidentified_Chloroplast	0.24938	0.370561	0.660873	0.554414	0.132574	1.29563
OTU_632	k__Bacteria;p__Proteobacteria;c__Alphaproteobacteria;o__Rhizobiales;f__Hyphomicrobiaceae;g__Prosthecomicrobium;s__	0.250507	0.369614	0.0184339	0.0180061	0.0345348	0.00276087
OTU_436	k__Bacteria;p__Proteobacteria;c__Alphaproteobacteria;o__Rhodospirillales;f__unidentified_Rhodospirillales;g__Geminicoccus;s__	0.250594	0.369541	0.0535825	0.0221242	0.105303	0.0333206
OTU_77	k__Bacteria;p__Acidobacteria;c__unidentified_Acidobacteria;o__Subgroup_3;f__unidentified_Acidobacteria;g__Bryobacter;s__	0.251222	0.369014	0.00460293	0.00552394	0.00828485	0
OTU_705	k__Bacteria;p__Planctomycetes;c__Phycisphaerae;o__WD2101_soil_group;f__;g__;s__	0.252526	0.367925	0.00845936	0	0.0253781	0
OTU_898	k__Bacteria;p__Proteobacteria;c__Deltaproteobacteria;o__Myxococcales;f__Haliangiaceae;g__Haliangium;s__	0.256075	0.364978	0.0046211	0.00276844	0.00137872	0.00971614
OTU_99	k__Bacteria;p__Proteobacteria;c__Gammaproteobacteria;o__Xanthomonadales;f__Xanthomonadaceae;g__Rhodanobacter;s__Frateuria_terrea	0.256637	0.364514	0.0110967	0.00553834	0.0152569	0.012495
OTU_155	k__Bacteria;p__Proteobacteria;c__Alphaproteobacteria;o__Rhizobiales;f__Methylobacteriaceae;g__;s__	0.258237	0.363196	0.15791	0.469567	0.0013829	0.00278015
OTU_5	k__Bacteria;p__Acidobacteria;c__unidentified_Acidobacteria;o__Subgroup_4;f__11-24;g__;s__	0.260384	0.361436	2.26279	1.50629	3.38236	1.89972
OTU_254	k__Bacteria;p__Proteobacteria;c__Alphaproteobacteria;o__Sphingomonadales;f__Sphingomonadaceae;g__Sphingomonas;s__	0.261528	0.360502	0.185682	0.0706866	0.209923	0.276435
OTU_235	k__Bacteria;p__Bacteroidetes;c__Flavobacteriia;o__Flavobacteriales;f__Cryomorphaceae;g__Fluviicola;s__	0.2628	0.359467	0.0752187	0.156312	0.0278306	0.0415131
OTU_1016	k__Bacteria;p__Proteobacteria;c__Deltaproteobacteria	0.263213	0.359131	0.00600515	0.0124755	0.00414869	0.00139127
OTU_344	k__Bacteria;p__Armatimonadetes;c__;o__;f__;g__;s__	0.264631	0.357982	0.0638245	0.00551581	0	0.185958
OTU_1333	k__Bacteria;p__Verrucomicrobia;c__Opitutae;o__Opitutales;f__Opitutaceae;g__Opitutus;s__	0.266922	0.356135	0.00600787	0.0124286	0.00421459	0.00138043
OTU_117	k__Bacteria;p__Proteobacteria;c__Alphaproteobacteria;o__Rhizobiales;f__Beijerinckiaceae	0.26899	0.354477	0.0919249	0.11348	0.0832481	0.0790462
OTU_131	k__Bacteria;p__Bacteroidetes;c__Cytophagia;o__Cytophagales;f__Cytophagaceae;g__Siphonobacter;s__Siphonobacter_aquaeclarae	0.269174	0.354329	0.206591	0.515205	0.100416	0.00415213
OTU_267	k__Bacteria;p__Cyanobacteria;c__Chloroplast;o__unidentified_Chloroplast;f__unidentified_Chloroplast;g__unidentified_Chloroplast	0.271905	0.352153	0.0581832	0.012443	0.0608444	0.101262
OTU_395	k__Bacteria;p__Bacteroidetes;c__Sphingobacteriia;o__Sphingobacteriales;f__Sphingobacteriaceae;g__Arcticibacter;s__	0.272221	0.351902	0.0380449	0.00137775	0.0266992	0.0860577
OTU_483	k__Bacteria;p__Proteobacteria;c__Alphaproteobacteria;o__Rhizobiales;f__unidentified_Rhizobiales;g__Bauldia;s__	0.272866	0.351391	0.0272509	0.0180042	0.0179359	0.0458124
OTU_868	k__Bacteria;p__Acidobacteria;c__Holophagae;o__Subgroup_7;f__;g__;s__	0.273187	0.351136	0.00921285	0.00138255	0	0.026256
OTU_726	k__Bacteria;p__Chlorobi;c__Chlorobia;o__Chlorobiales;f__OPB56;g__;s__	0.276261	0.348712	0.0212329	0.0318043	0.0235538	0.00834046
OTU_918	k__Bacteria;p__Chloroflexi;c__Anaerolineae;o__Anaerolineales;f__Anaerolineaceae;g__;s__	0.277562	0.347691	0.00971918	0.0138289	0.0139482	0.00138043
OTU_52	k__Bacteria;p__Verrucomicrobia;c__OPB35_soil_group;o__;f__;g__;s__	0.278698	0.346802	0.512566	1.03024	0.501921	0.00553257
OTU_468	k__Bacteria;p__Bacteroidetes;c__Sphingobacteriia;o__Sphingobacteriales;f__Chitinophagaceae;g__Sediminibacterium;s__	0.2836	0.342995	0.0225856	0.0636155	0	0.0041413
OTU_466	k__Bacteria;p__Proteobacteria;c__Alphaproteobacteria;o__Sphingomonadales;f__Sphingomonadaceae;g__Sphingomonas;s__	0.284594	0.342228	1.33933	0.460395	1.49389	2.0637
OTU_465	k__Bacteria;p__Proteobacteria;c__Alphaproteobacteria;o__Rhizobiales;f__Xanthobacteraceae;g__Pseudoxanthobacter;s__	0.28536	0.341639	0.0497594	0.026253	0.11746	0.00556506
OTU_396	k__Bacteria;p__Bacteroidetes;c__Sphingobacteriia;o__Sphingobacteriales;f__Chitinophagaceae;g__Flavisolibacter;s__Bacteroidetes_bacterium_RG1-1	0.285622	0.341437	0.0295865	0.00138255	0.0846161	0.00276087
OTU_568	k__Bacteria;p__Bacteroidetes;c__Sphingobacteriia;o__Sphingobacteriales;f__Chitinophagaceae	0.286318	0.340902	0.0262974	0.0345794	0.0318721	0.0124408
OTU_249	k__Bacteria;p__Chloroflexi;c__TK10;o__;f__;g__;s__	0.290285	0.337873	0.0681921	0.036075	0.0838426	0.0846585
OTU_522	k__Bacteria;p__Proteobacteria;c__Alphaproteobacteria;o__Rickettsiales;f__;g__;s__	0.291815	0.336711	0.0148211	0.0333084	0.00141585	0.00973886
OTU_16	k__Bacteria;p__Verrucomicrobia;c__Verrucomicrobiae;o__Verrucomicrobiales;f__Verrucomicrobiaceae;g__Haloferula;s__	0.292048	0.336535	1.52504	4.54593	0.0167057	0.012495
OTU_493	k__Bacteria;p__Verrucomicrobia;c__OPB35_soil_group;o__;f__;g__;s__	0.293519	0.335423	0.0240682	0.0555494	0.0028317	0.0138236
OTU_1113	k__Bacteria;p__Armatimonadetes;c__;o__;f__;g__;s__	0.295119	0.334218	0.00414494	0.00829865	0.00413616	0
OTU_428	k__Bacteria;p__Acidobacteria;c__Holophagae;o__Subgroup_7;f__;g__;s__	0.295425	0.333988	0.0277537	0	0.0207351	0.0625261
OTU_576	k__Bacteria;p__Actinobacteria;c__Acidimicrobiia;o__Acidimicrobiales;f__Acidimicrobiaceae;g__;s__	0.295628	0.333835	0.0138434	0.0152166	0.0207555	0.00555793
OTU_1180	k__Bacteria;p__Acidobacteria;c__unidentified_Acidobacteria;o__Subgroup_3;f__unidentified_Acidobacteria;g__Candidatus_Solibacter;s__	0.296606	0.333101	0.0138823	0.0194079	0.0152898	0.0069492
OTU_552	k__Bacteria;p__Actinobacteria;c__TakashiAC-B11;o__;f__;g__;s__	0.29681	0.332948	0.0208838	0.0527651	0.00849509	0.00139127
OTU_190	k__Bacteria;p__Bacteroidetes;c__Sphingobacteriia;o__Sphingobacteriales;f__Chitinophagaceae;g__Chitinophaga;s__Chitinophaga_jiangningensis	0.298434	0.331734	0.438931	1.30988	0.00414451	0.00276932
OTU_1826	k__Bacteria;p__Verrucomicrobia;c__Verrucomicrobiae;o__Verrucomicrobiales;f__Verrucomicrobiaceae;g__Prosthecobacter;s__	0.300266	0.33037	0.015664	0	0.0469921	0
OTU_773	k__Bacteria;p__Proteobacteria;c__Deltaproteobacteria;o__Myxococcales	0.30093	0.329876	0.0116498	0.00415099	0.0238963	0.00690217
OTU_456	k__Bacteria;p__TM6;c__;o__;f__;g__;s__	0.301331	0.329579	0.0232103	0.0414212	0.0282098	0
OTU_732	k__Bacteria;p__Chloroflexi;c__TK10;o__;f__;g__;s__	0.303786	0.327763	0.0111278	0.0027651	0.00563044	0.0249878
OTU_56	k__Bacteria;p__Acidobacteria;c__unidentified_Acidobacteria;o__Acidobacteriales;f__Acidobacteriaceae_.Subgroup_1.;g__;s__	0.304168	0.327481	0.0133902	0.0096812	0.0110752	0.0194141
OTU_163	k__Bacteria;p__Proteobacteria;c__Alphaproteobacteria;o__Rhodospirillales;f__Rhodospirillaceae;g__Ferrovibrio;s__alpha_proteobacterium_OR-84	0.306736	0.325594	0.133957	0.184317	0.139783	0.0777722
OTU_8	k__Bacteria;p__Chloroflexi;c__Ktedonobacteria;o__JG30-KF-AS9;f__;g__;s__	0.306737	0.325593	0.0143534	0.00690796	0.0194798	0.0166725
OTU_291	k__Bacteria;p__Proteobacteria;c__Alphaproteobacteria;o__Rickettsiales;f__Mitochondria;g__unidentified_Mitochondria;s__Malawimonas_jakobiformis	0.306908	0.325468	0.0517361	0.00413326	0.0941648	0.0569104
OTU_563	k__Bacteria;p__Actinobacteria;c__Acidimicrobiia;o__Acidimicrobiales;f__Iamiaceae;g__Iamia;s__	0.309087	0.323875	0.0440308	0.0471924	0.019723	0.0651771
OTU_299	k__Bacteria;p__Proteobacteria;c__Betaproteobacteria;o__TRA3-20;f__;g__;s__	0.310289	0.323	0.111447	0.103771	0.0627112	0.167859
OTU_342	k__Bacteria;p__Bacteroidetes;c__Cytophagia;o__Cytophagales;f__Cytophagaceae;g__Flectobacillus;s__	0.310508	0.32284	0.0318307	0.00414286	0.0913491	0
OTU_606	k__Bacteria;p__Microgenomates;c__;o__;f__;g__;s__	0.311589	0.322056	0.0127069	0	0.0381207	0
OTU_769	k__Bacteria;p__Cyanobacteria;c__Chloroplast;o__unidentified_Chloroplast;f__unidentified_Chloroplast;g__unidentified_Chloroplast;s__Acutodesmus_obliquus	0.311679	0.32199	0.00938146	0	0.0239706	0.0041738
OTU_869	k__Bacteria;p__Proteobacteria;c__Alphaproteobacteria;o__Sphingomonadales;f__Erythrobacteraceae;g__Altererythrobacter;s__	0.312541	0.321366	0.0682264	0.0666154	0.111738	0.026326
OTU_98	k__Bacteria;p__Proteobacteria;c__Betaproteobacteria;o__Burkholderiales;f__Burkholderiaceae;g__Burkholderia;s__Burkholderia_cepacia	0.312811	0.321171	0.252034	0.366681	0.385249	0.00417142
OTU_284	k__Bacteria;p__Verrucomicrobia;c__Opitutae;o__Opitutales;f__Opitutaceae;g__Opitutus;s__	0.313255	0.32085	0.0652415	0.0220728	0.0208999	0.152752
OTU_295	k__Bacteria;p__Cyanobacteria;c__Chloroplast;o__unidentified_Chloroplast;f__unidentified_Chloroplast;g__unidentified_Chloroplast	0.31416	0.320196	0.0508387	0.00829531	0.101327	0.0428936
OTU_195	k__Bacteria;p__Proteobacteria;c__Gammaproteobacteria;o__Xanthomonadales;f__Xanthomonadaceae	0.315928	0.318923	0.133038	0.0692093	0.224468	0.105437
OTU_184	k__Bacteria;p__Chloroflexi;c__KD4-96;o__;f__;g__;s__	0.319627	0.316275	0.111642	0.0774552	0.139478	0.117993
OTU_444	k__Bacteria;p__Thermomicrobia;c__unidentified_Thermomicrobia;o__JG30-KF-CM45;f__;g__;s__	0.319768	0.316175	0.0262898	0.0138241	0.0428898	0.0221556
OTU_1394	k__Bacteria;p__Proteobacteria;c__Alphaproteobacteria;o__Sphingomonadales	0.319912	0.316072	0.00556557	0	0.0111412	0.00555556
OTU_638	k__Bacteria;p__Proteobacteria;c__Alphaproteobacteria;o__Rhizobiales;f__A0839;g__;s__	0.320493	0.315658	0.0272181	0.0455685	0	0.0360857
OTU_786	k__Bacteria;p__Proteobacteria;c__Gammaproteobacteria;o__Xanthomonadales;f__Solimonadaceae	0.328518	0.309994	0.0089353	0.00139069	0.0254152	0
OTU_614	k__Bacteria;p__Actinobacteria;c__Acidimicrobiia;o__Acidimicrobiales;f__;g__;s__	0.329631	0.309215	0.0143551	0.015265	0.00698039	0.0208199
OTU_1162	k__Bacteria;p__Cyanobacteria;c__Chloroplast;o__unidentified_Chloroplast;f__unidentified_Chloroplast;g__unidentified_Chloroplast	0.329707	0.309163	2.08319	0.0345014	6.15676	0.0583161
OTU_149	k__Bacteria;p__Proteobacteria;c__Alphaproteobacteria;o__Rickettsiales;f__Mitochondria;g__unidentified_Mitochondria;s__Aegilops_tauschii	0.330791	0.308406	0.157612	0.471454	0.0013829	0
OTU_928	k__Bacteria;p__Actinobacteria;c__Acidimicrobiia;o__Acidimicrobiales;f__;g__;s__	0.330874	0.308348	0.0138775	0.019382	0.00839206	0.0138585
OTU_169	k__Bacteria;p__Proteobacteria;c__Betaproteobacteria;o__Nitrosomonadales;f__Nitrosomonadaceae;g__;s__	0.330987	0.30827	0.0194521	0.00967973	0.0279169	0.0207596
OTU_73	k__Bacteria;p__Gemmatimonadetes;c__unidentified_Gemmatimonadetes;o__Gemmatimonadales;f__Gemmatimonadaceae;g__Gemmatimonas;s__	0.333067	0.306823	0.00787218	0.00278137	0.0124994	0.00833571
OTU_185	k__Bacteria;p__Acidobacteria;c__unidentified_Acidobacteria;o__Subgroup_3;f__unidentified_Acidobacteria;g__Bryobacter;s__	0.333272	0.306682	0.0395153	0.0373604	0.0631772	0.0180083
OTU_145	k__Bacteria;p__Acidobacteria;c__unidentified_Acidobacteria;o__Subgroup_4;f__unidentified_Acidobacteria;g__Blastocatella	0.334376	0.305916	0.231569	0.056719	0.42943	0.208559
OTU_759	k__Bacteria;p__Proteobacteria;c__Deltaproteobacteria;o__Myxococcales;f__BIrii41;g__;s__	0.336007	0.30479	0.00645163	0.0151649	0.00279875	0.00139127
OTU_365	k__Bacteria;p__Thermomicrobia;c__unidentified_Thermomicrobia;o__JG30-KF-CM45;f__;g__;s__	0.338924	0.302784	0.0305196	0.0624755	0.0193684	0.00971482
OTU_301	k__Bacteria;p__Proteobacteria;c__Deltaproteobacteria;o__Myxococcales;f__Sandaracinaceae;g__;s__	0.339967	0.302069	0.046553	0.106394	0.00276162	0.0305032
OTU_951	k__Bacteria;p__Proteobacteria;c__Alphaproteobacteria;o__Sphingomonadales	0.345103	0.298572	0.00463814	0.00278137	0.00141585	0.0097172
OTU_790	k__Bacteria;p__Actinobacteria;c__unidentified_Actinobacteria;o__Pseudonocardiales;f__Pseudonocardiaceae;g__Pseudonocardia	0.346111	0.29789	0.00743015	0.0152813	0.00700916	0
OTU_799	k__Bacteria;p__Proteobacteria;c__Alphaproteobacteria;o__Rhizobiales;f__A0839	0.346355	0.297725	0.0116369	0.0165748	0.018336	0
OTU_150	k__Bacteria;p__Bacteroidetes;c__Cytophagia;o__Cytophagales;f__Cytophagaceae	0.346935	0.297333	0.149843	0.44815	0.00137872	0
OTU_1812	k__Bacteria;p__Firmicutes;c__Bacilli;o__Bacillales;f__Bacillaceae;g__Bacillus	0.348144	0.296518	0.00972491	0.00691129	0.0139399	0.00832355
OTU_387	k__Bacteria;p__Cyanobacteria;c__Chloroplast;o__unidentified_Chloroplast;f__unidentified_Chloroplast;g__unidentified_Chloroplast	0.349062	0.2959	0.0542077	0.16124	0.0013829	0
OTU_108	k__Bacteria;p__Proteobacteria;c__Betaproteobacteria;o__Burkholderiales;f__Burkholderiaceae;g__Cupriavidus;s__Cupriavidus_pauculus	0.350056	0.295233	0.376481	0.254544	0.383864	0.491036
OTU_361	k__Bacteria;p__Acidobacteria;c__unidentified_Acidobacteria;o__Subgroup_6;f__;g__;s__	0.352644	0.2935	0.109744	0.0165666	0.147461	0.165205
OTU_266	k__Bacteria;p__Proteobacteria;c__Alphaproteobacteria;o__Rhizobiales;f__Aurantimonadaceae;g__Aureimonas;s__	0.356246	0.291103	0.142563	0.125984	0.212875	0.088831
OTU_197	k__Bacteria;p__Proteobacteria;c__Alphaproteobacteria;o__Rhodospirillales;f__DA111;g__;s__	0.357166	0.290493	0.00553057	0.00965866	0.00276162	0.00417142
OTU_7	k__Bacteria;p__Bacteroidetes;c__Sphingobacteriia;o__Sphingobacteriales;f__Chitinophagaceae;g__Niastella;s__	0.358629	0.289526	1.56519	0.0124448	4.67202	0.011105
OTU_18	k__Bacteria;p__Proteobacteria;c__Betaproteobacteria;o__Burkholderiales;f__Burkholderiaceae;g__Ralstonia;s__Ralstonia_pickettii	0.358786	0.289422	1.13462	2.68522	0.704777	0.0138622
OTU_74	k__Bacteria;p__Proteobacteria;c__Alphaproteobacteria;o__Sphingomonadales;f__Sphingomonadaceae;g__Sphingomonas	0.359344	0.289053	0.319761	0.165202	0.208912	0.585168
OTU_414	k__Bacteria;p__Proteobacteria;c__Deltaproteobacteria;o__Bdellovibrionales;f__Bdellovibrionaceae;g__Bdellovibrio;s__	0.361845	0.287408	0.0267102	0.00138255	0.0773569	0.00139127
OTU_831	k__Bacteria;p__Proteobacteria;c__Alphaproteobacteria;o__Rhodospirillales;f__Rhodospirillaceae	0.365833	0.2848	0.00368666	0	0.00413616	0.00692383
OTU_793	k__Bacteria;p__Bacteroidetes;c__Sphingobacteriia;o__Sphingobacteriales;f__env.OPS_17;g__;s__	0.367163	0.283934	0.0059838	0.00137775	0	0.0165737
OTU_1396	k__Bacteria;p__Bacteroidetes;c__Cytophagia;o__Cytophagales;f__Cytophagaceae;g__Flexibacter;s__	0.367966	0.283412	0.0036832	0.00414766	0.00690196	0
OTU_457	k__Bacteria;p__Proteobacteria;c__Gammaproteobacteria;o__Xanthomonadales;f__Xanthomonadaceae;g__Panacagrimonas;s__	0.36873	0.282917	0.0232609	0.0027603	0.0267364	0.040286
OTU_353	k__Bacteria;p__Proteobacteria;c__Alphaproteobacteria;o__Rickettsiales;f__unidentified_Rickettsiales;g__Candidatus_Captivus;s__	0.370599	0.281708	0.0272415	0.0594065	0.00842919	0.0138889
OTU_672	k__Bacteria;p__Thermomicrobia;c__unidentified_Thermomicrobia;o__JG30-KF-CM45;f__;g__;s__	0.374147	0.279422	0.0411118	0.0485587	0.0180185	0.0567582
OTU_125	k__Bacteria;p__Proteobacteria;c__Alphaproteobacteria;o__Rhizobiales;f__Methylobacteriaceae;g__Methylobacterium;s__Methylobacterium_radiotolerans	0.374151	0.27942	0.0883561	0.144289	0.048685	0.0720938
OTU_774	k__Bacteria;p__Bacteroidetes;c__Sphingobacteriia;o__Sphingobacteriales;f__Chitinophagaceae;g__Niabella;s__	0.375071	0.27883	0.00974962	0.0194308	0.00842919	0.00138889
OTU_246	k__Bacteria;p__Actinobacteria	0.375655	0.278455	0.0796856	0.234919	0.00275744	0.00138043
OTU_708	k__Bacteria;p__Actinobacteria;c__unidentified_Actinobacteria;o__Streptomycetales;f__Streptomycetaceae;g__Streptomyces	0.377134	0.27751	0.0147726	0.0027651	0.0415528	0
OTU_724	k__Bacteria;p__Saccharibacteria;c__;o__;f__;g__;s__	0.379422	0.276052	0.0115758	0.0305788	0.00414869	0
OTU_121	k__Bacteria;p__Firmicutes;c__Bacilli;o__Bacillales;f__Bacillaceae;g__Bacillus;s__Bacillus_anthracis	0.380551	0.275334	0.0130406	0.00968786	0.0224846	0.0069492
OTU_785	k__Bacteria;p__Actinobacteria;c__Acidimicrobiia;o__Acidimicrobiales;f__;g__;s__	0.380604	0.275301	0.0139198	0.00556274	0.019529	0.0166677
OTU_367	k__Bacteria;p__Chloroflexi;c__TK10;o__;f__;g__;s__	0.382363	0.274186	0.0305137	0.0401772	0.0222373	0.0291265
OTU_2	k__Bacteria;p__Cyanobacteria;c__Chloroplast;o__unidentified_Chloroplast;f__unidentified_Chloroplast;g__unidentified_Chloroplast	0.382637	0.274013	3.7917	11.22	0.146766	0.00831034
OTU_231	k__Bacteria;p__Bacteroidetes;c__Sphingobacteriia;o__Sphingobacteriales;f__Chitinophagaceae;g__Flavitalea;s__	0.385692	0.272086	0.362726	0.342365	0.285093	0.46072
OTU_872	k__Bacteria;p__Armatimonadetes;c__Armatimonadia;o__Armatimonadales;f__;g__;s__	0.386209	0.271761	0.00649532	0	0.00981209	0.00967387
OTU_946	k__Bacteria;p__Deinococcus-Thermus;c__Deinococci;o__Deinococcales;f__Deinococcaceae;g__Deinococcus	0.386326	0.271687	0.00369666	0.0027651	0	0.00832488
OTU_1011	k__Bacteria;p__Proteobacteria;c__Gammaproteobacteria;o__Legionellales;f__Legionellaceae;g__Legionella;s__Tatlockia_maceachernii	0.392948	0.267549	0.010669	0.016581	0.0154258	0
OTU_356	k__Bacteria;p__Actinobacteria;c__unidentified_Actinobacteria;o__Frankiales;f__Acidothermaceae;g__Acidothermus	0.394154	0.266801	0.00372176	0.00137775	0.00700499	0.00278253
OTU_1099	k__Bacteria;p__Armatimonadetes;c__;o__;f__;g__;s__	0.395364	0.266051	0.00370389	0.00278137	0.00137872	0.00695157
OTU_30	k__Bacteria;p__Proteobacteria;c__Alphaproteobacteria;o__Caulobacterales;f__Caulobacteraceae;g__Brevundimonas;s__	0.397063	0.265002	0.92871	1.33837	0.588202	0.85956
OTU_555	k__Bacteria;p__Acidobacteria;c__unidentified_Acidobacteria;o__Subgroup_3;f__unidentified_Acidobacteria;g__Bryobacter;s__	0.399117	0.263737	0.013366	0.0387067	0	0.00139127
OTU_721	k__Bacteria;p__Proteobacteria;c__Alphaproteobacteria;o__Rickettsiales;f__Holosporaceae;g__;s__	0.399834	0.263296	0.0129315	0.0221567	0.00275744	0.0138804
OTU_1146	k__Bacteria;p__Proteobacteria;c__Gammaproteobacteria;o__Legionellales;f__Legionellaceae;g__Legionella;s__	0.399902	0.263254	0.00601797	0.00972666	0	0.00832725
OTU_635	k__Bacteria;p__Proteobacteria;c__Gammaproteobacteria;o__Pseudomonadales;f__Pseudomonadaceae;g__Pseudomonas;s__Pseudomonas_alcaligenes	0.400001	0.263193	0.0172174	0.00834411	0.0141585	0.0291495
OTU_126	k__Bacteria;p__Proteobacteria;c__Alphaproteobacteria;o__Rhizobiales;f__unidentified_Rhizobiales;g__Rhizomicrobium;s__	0.400926	0.262626	0.0216536	0.0386513	0.00829738	0.018012
OTU_82	k__Bacteria;p__Actinobacteria;c__unidentified_Actinobacteria;o__Frankiales;f__Frankiaceae;g__Jatrophihabitans;s__	0.402361	0.261747	0.0055603	0.0027651	0.009742	0.0041738
OTU_575	k__Bacteria;p__Proteobacteria;c__Gammaproteobacteria;o__Enterobacteriales;f__Enterobacteriaceae;g__Buchnera;s__	0.403244	0.261207	0.0400827	0.00138255	0.118865	0
OTU_585	k__Bacteria;p__Proteobacteria;c__Deltaproteobacteria;o__Oligoflexales;f__;g__;s__	0.403278	0.261186	0.0138705	0.0221423	0.0013829	0.0180865
OTU_1103	k__Bacteria;p__TM6;c__;o__;f__;g__;s__	0.4035	0.261051	0.00415205	0.00552541	0.00693073	0
OTU_167	k__Bacteria;p__Actinobacteria;c__unidentified_Actinobacteria;o__Frankiales;f__Acidothermaceae;g__Acidothermus;s__	0.406093	0.259471	0.00415767	0	0.00551906	0.00695395
OTU_647	k__Bacteria;p__Proteobacteria;c__Alphaproteobacteria;o__Caulobacterales;f__Hyphomonadaceae;g__Woodsholea;s__	0.407851	0.258404	0.0108203	0.0027651	0.0296957	0
OTU_55	k__Bacteria;p__Gemmatimonadetes;c__unidentified_Gemmatimonadetes;o__AT425-EubC11_terrestrial_group;f__;g__;s__	0.408313	0.258124	0.448555	0.00831158	0.00555201	1.3318
OTU_208	k__Bacteria;p__Bacteroidetes;c__Sphingobacteriia;o__Sphingobacteriales;f__Chitinophagaceae;g__Filimonas;s__	0.410035	0.257083	0.0956815	0.124713	0.0736839	0.0886482
OTU_484	k__Bacteria;p__Chloroflexi;c__Chloroflexia;o__Kallotenuales;f__AKIW781;g__;s__	0.413327	0.2551	0.0271541	0	0.0137872	0.0676751
OTU_1868	k__Bacteria;p__Acidobacteria;c__unidentified_Acidobacteria;o__Subgroup_6;f__;g__;s__	0.413712	0.254869	0.0507785	0.0663201	0.0540843	0.031931
OTU_80	k__Bacteria;p__Proteobacteria;c__Alphaproteobacteria;o__Rhodospirillales;f__unidentified_Rhodospirillales;g__Reyranella;s__	0.414094	0.254639	0.371059	0.0981592	0.458342	0.556676
OTU_821	k__Bacteria;p__Proteobacteria;c__Gammaproteobacteria;o__Xanthomonadales;f__Xanthomonadaceae	0.41511	0.254031	0.00743578	0.00968453	0.00984504	0.00277778
OTU_592	k__Bacteria;p__Proteobacteria;c__Alphaproteobacteria;o__Rhodospirillales;f__Acetobacteraceae	0.415136	0.254015	0.0138743	0.0235005	0.00977496	0.00834759
OTU_783	k__Bacteria;p__Acidobacteria;c__unidentified_Acidobacteria;o__Subgroup_3;f__unidentified_Acidobacteria;g__Bryobacter;s__Acidobacteria_bacterium_LX128	0.41644	0.253235	0.0115986	0.0193528	0.00987799	0.00556506
OTU_462	k__Bacteria;p__Verrucomicrobia;c__Verrucomicrobiae;o__Verrucomicrobiales;f__Verrucomicrobiaceae;g__Prosthecobacter;s__	0.420509	0.25081	0.0207775	0.0124434	0.0485002	0.00138889
OTU_1267	k__Bacteria;p__Proteobacteria;c__Alphaproteobacteria;o__Rhizobiales;f__Beijerinckiaceae;g__Methylorosula;s__	0.421178	0.250413	0.0244677	0.0332515	0.0193643	0.0207874
OTU_133	k__Bacteria;p__Proteobacteria;c__Alphaproteobacteria;o__Rhodospirillales;f__Acetobacteraceae	0.424861	0.248235	0.00418589	0.00137775	0.00563044	0.00554948
OTU_39	k__Bacteria;p__Bacteroidetes;c__Cytophagia;o__Cytophagales;f__Cytophagaceae;g__Ohtaekwangia;s__Ohtaekwangia_kribbensis	0.42765	0.246594	0.591083	1.72541	0.0436811	0.00416059
OTU_331	k__Bacteria;p__Chlorobi;c__Chlorobia;o__Chlorobiales;f__OPB56;g__;s__	0.42936	0.24559	0.0433195	0.123042	0.00414451	0.0027717
OTU_380	k__Bacteria;p__Bacteroidetes;c__Cytophagia;o__Cytophagales;f__Cytophagaceae;g__;s__	0.435175	0.2422	0.0353162	0.0608992	0.036709	0.00834046
OTU_420	k__Bacteria;p__Bacteroidetes;c__Cytophagia;o__Cytophagales;f__Cytophagaceae;g__;s__	0.436972	0.241158	0.0262856	0.0138255	0.00563044	0.0594009
OTU_757	k__Bacteria;p__Chloroflexi;c__TK10;o__;f__;g__;s__	0.436976	0.241156	0.00654339	0.00695343	0.0126767	0
OTU_677	k__Bacteria;p__Proteobacteria;c__Alphaproteobacteria;o__Rickettsiales;f__unidentified_Rickettsiales;g__Candidatus_Hepatincola;s__Ephemera_danica	0.437912	0.240614	0.00844785	0.00555461	0.0197889	0
OTU_1379	k__Bacteria;p__Proteobacteria;c__Alphaproteobacteria;o__Rhizobiales;f__Xanthobacteraceae;g__Aquabacter;s__	0.440038	0.239388	0.0237093	0.0207889	0.0350746	0.0152643
OTU_202	k__Bacteria;p__Armatimonadetes;c__Chthonomonadetes;o__Chthonomonadales;f__Chthonomonadaceae;g__Chthonomonas;s__	0.440474	0.239136	0.104246	0.149781	0.0577036	0.105252
OTU_370	k__Archaea;p__Euryarchaeota;c__Thermoplasmata;o__Thermoplasmatales	0.440541	0.239098	0.0368673	0.100922	0.00968027	0
OTU_377	k__Bacteria;p__Verrucomicrobia;c__OPB35_soil_group;o__;f__;g__;s__	0.441398	0.238605	0.049334	0.00415579	0.139673	0.0041738
OTU_330	k__Bacteria;p__Acidobacteria;c__Holophagae;o__Subgroup_7;f__;g__;s__	0.442804	0.237797	0.0457144	0.00413806	0.128842	0.00416297
OTU_106	k__Bacteria;p__Proteobacteria;c__Alphaproteobacteria;o__Rhodospirillales;f__Acetobacteraceae	0.442821	0.237788	0.00647366	0.00415579	0.00970488	0.00556031
OTU_85	k__Bacteria;p__Chloroflexi;c__Ktedonobacteria;o__Ktedonobacterales;f__Ktedonobacteraceae;g__Ktedonobacter;s__	0.445164	0.236446	0.00556282	0.00277324	0.00974618	0.00416904
OTU_206	k__Bacteria;p__Proteobacteria;c__Gammaproteobacteria;o__Enterobacteriales;f__Enterobacteriaceae;g__Enterobacter	0.445496	0.236256	0.24946	0.500457	0.150709	0.0972137
OTU_549	k__Bacteria;p__Actinobacteria;c__unidentified_Actinobacteria;o__Frankiales;f__Geodermatophilaceae;g__Geodermatophilus;s__	0.445504	0.236251	0.00467522	0.00414766	0.00987799	0
OTU_196	k__Bacteria;p__Proteobacteria;c__Gammaproteobacteria;o__Xanthomonadales;f__unidentified_Xanthomonadales;g__Steroidobacter;s__	0.449002	0.234257	0.109637	0.243257	0.0787114	0.00694312
OTU_400	k__Bacteria;p__Bacteroidetes;c__Cytophagia;o__Cytophagales;f__Cytophagaceae;g__;s__	0.450174	0.233592	0.0286516	0.00553021	0.0263038	0.0541207
OTU_383	k__Bacteria;p__Gemmatimonadetes;c__unidentified_Gemmatimonadetes;o__AT425-EubC11_terrestrial_group;f__;g__;s__	0.450751	0.233264	0.030528	0.00414286	0.00968027	0.0777609
OTU_887	k__Bacteria;p__Proteobacteria;c__Deltaproteobacteria;o__Myxococcales;f__Cystobacteraceae;g__Anaeromyxobacter;s__	0.45386	0.231506	0.0041432	0	0.00413616	0.00829343
OTU_165	k__Bacteria;p__Chloroflexi;c__Chloroflexia;o__Kallotenuales;f__AKIW781;g__;s__	0.460985	0.227505	0.150738	0.198145	0.0970474	0.157023
OTU_135	k__Bacteria;p__Proteobacteria;c__Alphaproteobacteria;o__Rhodospirillales;f__Acetobacteraceae	0.461958	0.226962	0.00371705	0.00139069	0.00559749	0.00416297
OTU_791	k__Bacteria;p__Chlorobi;c__Chlorobia;o__Chlorobiales;f__OPB56;g__;s__	0.464879	0.225336	0.00972352	0.0179366	0.00984504	0.00138889
OTU_641	k__Bacteria;p__Actinobacteria;c__unidentified_Actinobacteria;o__Kineosporiales;f__Kineosporiaceae;g__Angustibacter;s__	0.466213	0.224596	0.0189697	0.0166332	0.00691448	0.0333616
OTU_170	k__Bacteria;p__Gemmatimonadetes;c__unidentified_Gemmatimonadetes;o__Gemmatimonadales;f__Gemmatimonadaceae;g__Gemmatimonas	0.467135	0.224085	0.00370088	0	0.00414869	0.00695395
OTU_69	k__Bacteria;p__Chloroflexi;c__Ktedonobacteria;o__JG30-KF-AS9;f__;g__;s__	0.468032	0.223589	0.00461573	0.00138255	0.00690196	0.00556269
OTU_148	k__Archaea;p__Euryarchaeota;c__Thermoplasmata;o__Thermoplasmatales;f__;g__;s__	0.472825	0.220947	0.150858	0.0886261	0.00839624	0.355551
OTU_913	k__Bacteria;p__Actinobacteria;c__unidentified_Actinobacteria;o__Propionibacteriales;f__Nocardioidaceae;g__Nocardioides;s__	0.476152	0.219124	0.0069037	0.00138255	0.0013829	0.0179456
OTU_54	k__Bacteria;p__Proteobacteria;c__Gammaproteobacteria;o__Xanthomonadales;f__Xanthomonadaceae;g__Dyella;s__Dyella_marensis	0.476165	0.219117	0.369413	0.831272	0.265855	0.0111122
OTU_593	k__Bacteria;p__Proteobacteria;c__Gammaproteobacteria;o__Enterobacteriales;f__Enterobacteriaceae;g__Serratia;s__Serratia_marcescens	0.477833	0.218207	0.0226852	0.0111255	0.0013829	0.0555471
OTU_853	k__Bacteria;p__Proteobacteria;c__Deltaproteobacteria;o__Myxococcales;f__Sandaracinaceae;g__Sandaracinus;s__	0.480213	0.216911	0.00553637	0	0.013829	0.00278015
OTU_1783	k__Bacteria;p__Proteobacteria;c__Betaproteobacteria;o__Burkholderiales;f__Oxalobacteraceae;g__Paucimonas;s__	0.480305	0.216861	0.0115749	0.00832785	0.00839206	0.0180048
OTU_146	k__Bacteria;p__Proteobacteria;c__Alphaproteobacteria;o__Rhizobiales;f__Xanthobacteraceae;g__Labrys	0.480648	0.216674	0.0672971	0.164088	0.036412	0.00139127
OTU_1283	k__Bacteria;p__Proteobacteria;c__Gammaproteobacteria;o__Legionellales;f__Legionellaceae;g__Legionella;s__	0.48297	0.215415	0.00511652	0.0027555	0.00842501	0.00416904
OTU_1024	k__Bacteria;p__Proteobacteria;c__Betaproteobacteria;o__Burkholderiales;f__Comamonadaceae;g__Aquabacterium;s__	0.487039	0.213217	0.00646947	0.0111173	0	0.00829106
OTU_406	k__Bacteria;p__Proteobacteria;c__Alphaproteobacteria;o__Rickettsiales;f__LWSR-14;g__;s__	0.487125	0.213172	0.02696	0.0110752	0.0253822	0.0444225
OTU_10	k__Bacteria;p__Acidobacteria;c__unidentified_Acidobacteria;o__Acidobacteriales;f__Acidobacteriaceae_.Subgroup_1.;g__unidentified_Acidobacteria;s__bacterium_Ellin7538	0.488537	0.212412	0.0208483	0.0124448	0.0223032	0.0277968
OTU_58	k__Bacteria;p__Proteobacteria;c__Alphaproteobacteria;o__Rhizobiales;f__Rhizobiaceae;g__Rhizobium;s__Rhizobium_rhizogenes	0.489478	0.211907	0.35489	0.618665	0.42938	0.0166244
OTU_205	k__Bacteria;p__Proteobacteria;c__Alphaproteobacteria;o__Caulobacterales;f__Caulobacteraceae;g__Phenylobacterium;s__	0.492464	0.210307	0.0207979	0.0179754	0.0277976	0.0166207
OTU_19	k__Bacteria;p__Proteobacteria;c__Alphaproteobacteria;o__Rhizobiales;f__Rhizobiaceae;g__Rhizobium	0.493625	0.209687	1.26486	1.09898	1.16958	1.52603
OTU_620	k__Bacteria;p__Chloroflexi;c__Chloroflexia;o__Chloroflexales;f__Roseiflexaceae;g__Roseiflexus;s__	0.494635	0.209149	0.0120887	0	0.0167883	0.0194777
OTU_397	k__Bacteria;p__Proteobacteria;c__Deltaproteobacteria;o__Myxococcales;f__Blfdi19;g__;s__	0.496269	0.208279	0.0339325	0.0594808	0.0395366	0.00278015
OTU_355	k__Bacteria;p__Chloroflexi;c__Chloroflexia;o__Chloroflexales;f__Roseiflexaceae;g__Roseiflexus	0.497477	0.207637	0.051172	0.0234986	0.125844	0.0041738
OTU_335	k__Bacteria;p__Proteobacteria;c__Deltaproteobacteria;o__GR-WP33-30;f__unidentified_GR-WP33-30;g__unidentified_GR-WP33-30;s__bacterium_enrichment_culture_clone_B126.2011.	0.498215	0.207245	0.039715	0.0332563	0.0181628	0.0677258
OTU_782	k__Bacteria;p__Acidobacteria;c__unidentified_Acidobacteria;o__Subgroup_3	0.500939	0.205803	0.00649007	0	0.00835911	0.0111111
OTU_1107	k__Bacteria;p__Proteobacteria;c__Betaproteobacteria;o__Burkholderiales;f__Oxalobacteraceae;g__Massilia	0.501547	0.205482	0.018505	0.0277409	0.0013829	0.0263913
OTU_429	k__Bacteria;p__Cyanobacteria;c__Chloroplast;o__unidentified_Chloroplast;f__unidentified_Chloroplast;g__unidentified_Chloroplast;s__Acutodesmus_obliquus	0.502661	0.204894	0.0253523	0.0138662	0.0580169	0.0041738
OTU_375	k__Bacteria;p__Actinobacteria;c__unidentified_Actinobacteria;o__Propionibacteriales;f__Nocardioidaceae;g__Nocardioides;s__	0.502721	0.204862	0.0883778	0.113713	0.0516694	0.0997513
OTU_116	k__Bacteria;p__Actinobacteria;c__unidentified_Actinobacteria;o__Micrococcales;f__Intrasporangiaceae;g__Knoellia;s__	0.504035	0.20417	0.326049	0.340754	0.426507	0.210886
OTU_95	k__Bacteria;p__Acidobacteria;c__unidentified_Acidobacteria;o__Acidobacteriales;f__Acidobacteriaceae_.Subgroup_1.;g__;s__	0.504878	0.203727	0.00510594	0.00278137	0.00559332	0.00694312
OTU_1187	k__Bacteria;p__Proteobacteria;c__Gammaproteobacteria;o__Pseudomonadales;f__Moraxellaceae;g__Acinetobacter;s__Acinetobacter_junii	0.506288	0.202986	0.00466825	0.00137775	0.00845797	0.00416904
OTU_22	k__Bacteria;p__Chloroflexi;c__Ktedonobacteria;o__Ktedonobacterales	0.506592	0.202827	0.0264302	0.0179717	0.037684	0.0236349
OTU_654	k__Bacteria;p__Armatimonadetes;c__;o__;f__;g__;s__	0.507134	0.202542	0.0106005	0.0152569	0.0165446	0
OTU_975	k__Bacteria;p__Chloroflexi;c__JG30-KF-CM66;o__;f__;g__;s__	0.509311	0.201403	0.00468731	0.00415099	0.00991094	0
OTU_435	k__Bacteria;p__Proteobacteria;c__Alphaproteobacteria;o__Rhodospirillales;f__I-10	0.509398	0.201357	0.042941	0.0525226	0.00976661	0.0665338
OTU_128	k__Bacteria;p__Actinobacteria;c__unidentified_Actinobacteria;o__Frankiales	0.509965	0.201061	0.00416743	0.00554647	0.00556454	0.00139127
OTU_639	k__Bacteria;p__Proteobacteria;c__Deltaproteobacteria;o__Myxococcales	0.510219	0.200929	0.0147572	0.0304065	0.00414034	0.0097246
OTU_516	k__Bacteria;p__Proteobacteria;c__Betaproteobacteria;o__TRA3-20;f__;g__;s__	0.512177	0.199908	0.0495263	0.0124578	0.0624067	0.0737144
OTU_966	k__Bacteria;p__Bacteroidetes;c__Flavobacteriia;o__Flavobacteriales;f__Flavobacteriaceae;g__Chryseobacterium	0.513927	0.198997	0.00655298	0.00695343	0.0127055	0
OTU_728	k__Bacteria;p__Chloroflexi;c__TK10;o__;f__;g__;s__	0.516134	0.197853	0.0217908	0.0277342	0.0237603	0.0138778
OTU_451	k__Bacteria;p__Actinobacteria;c__Acidimicrobiia;o__Acidimicrobiales;f__;g__;s__	0.516555	0.197634	0.0306347	0.0667529	0.0251511	0
OTU_67	k__Bacteria;p__Firmicutes;c__Bacilli;o__Bacillales;f__Bacillaceae;g__Bacillus	0.518008	0.196883	0.0226538	0.0290392	0.0222535	0.0166688
OTU_103	k__Bacteria;p__Proteobacteria;c__Alphaproteobacteria;o__Sphingomonadales;f__Sphingomonadaceae;g__Blastomonas;s__Blastomonas_natatoria	0.518354	0.196704	0.607637	0.527286	0.765592	0.530032
OTU_827	k__Bacteria;p__Chloroflexi;c__TK10;o__;f__;g__;s__	0.519845	0.195935	0.00606965	0.00138255	0.0112938	0.00553257
OTU_991	k__Bacteria;p__Acidobacteria;c__unidentified_Acidobacteria;o__Subgroup_4;f__unidentified_Acidobacteria;g__Blastocatella;s__	0.521493	0.195086	0.00416655	0	0.00559749	0.00690217
OTU_1772	k__Bacteria;p__Chloroflexi;c__Chloroflexia;o__Chloroflexales;f__Roseiflexaceae;g__Roseiflexus	0.522221	0.194712	0.00414669	0.00554647	0.0068936	0
OTU_386	k__Bacteria;p__Cyanobacteria;c__Chloroplast;o__unidentified_Chloroplast;f__unidentified_Chloroplast;g__unidentified_Chloroplast;s__Chlorella_vulgaris	0.523783	0.193909	0.0383905	0.074629	0.0238963	0.0166461
OTU_832	k__Bacteria;p__Proteobacteria;c__Deltaproteobacteria;o__Myxococcales;f__BIrii41;g__;s__	0.527303	0.192108	0.00600379	0.0138255	0.00279457	0.00139127
OTU_839	k__Bacteria;p__Verrucomicrobia;c__OPB35_soil_group	0.528258	0.191621	0.00647035	0.00828091	0	0.0111301
OTU_661	k__Bacteria;p__Actinobacteria;c__Thermoleophilia;o__Solirubrobacterales;f__Patulibacteraceae;g__Patulibacter;s__	0.530658	0.190398	0.020836	0.0179846	0.0140596	0.0304636
OTU_25	k__Bacteria;p__Proteobacteria;c__Alphaproteobacteria;o__Rhizobiales;f__unidentified_Rhizobiales;g__Nordella	0.5317	0.189869	0.841448	0.988277	0.666363	0.869706
OTU_865	k__Bacteria;p__Proteobacteria;c__Alphaproteobacteria;o__Rhizobiales;f__Methylobacteriaceae;g__Methylobacterium;s__Methylobacterium_sp._AG46	0.533446	0.188983	0.00694629	0.0138255	0.00701334	0
OTU_1606	k__Bacteria;p__Acidobacteria;c__unidentified_Acidobacteria;o__Subgroup_3;f__unidentified_Acidobacteria;g__Candidatus_Solibacter;s__	0.533993	0.188705	0.00368119	0.00551101	0	0.00553257
OTU_219	k__Bacteria;p__Actinobacteria;c__Thermoleophilia;o__Solirubrobacterales;f__Conexibacteraceae;g__Conexibacter;s__	0.534243	0.188579	0.00415648	0.00417206	0.00690613	0.00139127
OTU_519	k__Bacteria;p__Proteobacteria;c__Gammaproteobacteria;o__Xanthomonadales;f__Xanthomonadaceae;g__Thermomonas;s__	0.536324	0.187527	0.018284	0.00414286	0.038195	0.0125143
OTU_627	k__Bacteria;p__Proteobacteria;c__Deltaproteobacteria;o__Myxococcales;f__mle1-27;g__;s__	0.538039	0.186662	0.0101371	0.0138159	0.00276579	0.0138297
OTU_776	k__Bacteria;p__Proteobacteria;c__Gammaproteobacteria;o__Xanthomonadales;f__Xanthomonadaceae;g__Stenotrophomonas	0.539937	0.185706	0.0116068	0.026423	0.00424755	0.00414976
OTU_602	k__Bacteria;p__Proteobacteria;c__Alphaproteobacteria;o__Rhodospirillales;f__Rhodospirillaceae;g__;s__	0.543761	0.183789	0.00691533	0	0.0124127	0.00833333
OTU_130	k__Bacteria;p__Chloroflexi;c__KD4-96;o__;f__;g__;s__	0.546052	0.182644	0.188717	0.178499	0.225501	0.162151
OTU_1009	k__Bacteria;p__Bacteroidetes;c__Sphingobacteriia;o__Sphingobacteriales;f__Chitinophagaceae;g__;s__	0.546913	0.182214	0.0084122	0.00413806	0.0169572	0.0041413
OTU_987	k__Bacteria;p__Actinobacteria;c__unidentified_Actinobacteria;o__Propionibacteriales;f__Nocardioidaceae;g__Nocardioides	0.549324	0.181015	0.00552891	0.012443	0.0013829	0.00276087
OTU_460	k__Bacteria;p__Armatimonadetes;c__;o__;f__;g__;s__	0.550956	0.180205	0.0234885	0.0235766	0.0454978	0.00139127
OTU_1155	k__Bacteria;p__Proteobacteria;c__Gammaproteobacteria;o__Enterobacteriales;f__Enterobacteriaceae;g__Escherichia-Shigella;s__Escherichia_coli	0.553714	0.178838	0.00467485	0.00694529	0.00707925	0
OTU_927	k__Bacteria;p__Actinobacteria;c__Thermoleophilia;o__Solirubrobacterales;f__Patulibacteraceae;g__Patulibacter;s__	0.5572	0.177119	0.0088412	0.00417206	0.0140267	0.00832488
OTU_883	k__Bacteria;p__Acidobacteria;c__unidentified_Acidobacteria;o__Acidobacteriales;f__Acidobacteriaceae_.Subgroup_1.;g__;s__	0.561285	0.175113	0.0036979	0.00139069	0.00414034	0.00556269
OTU_118	k__Bacteria;p__Proteobacteria;c__Alphaproteobacteria;o__Caulobacterales;f__Caulobacteraceae;g__;s__	0.563159	0.174196	0.00368279	0.00413806	0.00551906	0.00139127
OTU_809	k__Bacteria;p__Acidobacteria;c__unidentified_Acidobacteria;o__Subgroup_6	0.565835	0.17289	0.00692549	0.00278137	0.00556036	0.0124347
OTU_29	k__Bacteria;p__Proteobacteria;c__Alphaproteobacteria;o__Rhodospirillales	0.567623	0.17202	0.0184812	0.0179688	0.0235789	0.013896
OTU_158	k__Bacteria;p__Proteobacteria;c__Alphaproteobacteria;o__Rhodospirillales;f__Rhodospirillaceae;g__Ferrovibrio;s__	0.568354	0.171665	0.146517	0.232229	0.0797311	0.127591
OTU_954	k__Bacteria;p__Actinobacteria;c__Acidimicrobiia;o__Acidimicrobiales;f__;g__;s__	0.568815	0.171441	0.00835698	0.0138987	0.00839206	0.00278015
OTU_751	k__Bacteria;p__Proteobacteria;c__Alphaproteobacteria;o__Rickettsiales;f__unidentified_Rickettsiales;g__Candidatus_Captivus;s__	0.571642	0.17007	0.0111202	0.0222428	0.00417329	0.00694444
OTU_723	k__Bacteria;p__Chloroflexi;c__S085;o__;f__;g__;s__	0.57734	0.167322	0.0172084	0.0194227	0.0238921	0.00831034
OTU_1289	k__Bacteria;p__Proteobacteria;c__Alphaproteobacteria;o__Rhizobiales;f__Xanthobacteraceae;g__Variibacter;s__	0.579348	0.166358	0.00693952	0.00416392	0.0097007	0.00695395
OTU_37	k__Bacteria;p__Proteobacteria;c__Alphaproteobacteria;o__Rhodospirillales;f__Rhodospirillaceae;g__Elstera;s__	0.582775	0.164717	0.0138781	0.0166088	0.00973365	0.015292
OTU_682	k__Bacteria;p__Proteobacteria;c__Betaproteobacteria;o__TRA3-20	0.588214	0.162127	0.00738226	0.0138255	0.0013829	0.00693837
OTU_850	k__Bacteria;p__Proteobacteria;c__Alphaproteobacteria	0.591631	0.160507	0.00552168	0.00414286	0.00137872	0.0110435
OTU_368	k__Bacteria;p__Bacteroidetes;c__Cytophagia;o__Cytophagales;f__Cytophagaceae;g__Cytophaga;s__	0.59844	0.157299	0.0300217	0.0456117	0.0194924	0.0249612
OTU_541	k__Bacteria;p__Gemmatimonadetes;c__unidentified_Gemmatimonadetes;o__Gemmatimonadales;f__Gemmatimonadaceae	0.616066	0.149105	0.018023	0.00830678	0.00965105	0.0361111
OTU_473	k__Bacteria;p__Gemmatimonadetes;c__unidentified_Gemmatimonadetes;o__AT425-EubC11_terrestrial_group;f__;g__;s__	0.627818	0.143729	0.0295554	0.0248235	0.0430169	0.0208257
OTU_1115	k__Bacteria;p__Chloroflexi;c__Caldilineae;o__Caldilineales;f__Caldilineaceae;g__;s__	0.630653	0.142442	0.00979542	0.00829531	0.0169243	0.00416667
OTU_1190	k__Bacteria;p__Acidobacteria;c__unidentified_Acidobacteria;o__Subgroup_6;f__unidentified_Acidobacteria;g__unidentified_Acidobacteria	0.633099	0.141335	0.00512361	0.00138255	0.0056634	0.00832488
OTU_995	k__Bacteria;p__Proteobacteria;c__Alphaproteobacteria;o__Sphingomonadales;f__DSSF69;g__;s__	0.634128	0.14087	0.00371607	0.00417206	0.00141585	0.00556031
OTU_1459	k__Bacteria;p__Proteobacteria;c__Betaproteobacteria;o__Burkholderiales;f__Comamonadaceae	0.636018	0.140017	0.0167886	0.020742	0.0240694	0.00555423
OTU_1358	k__Bacteria;p__Chloroflexi;c__Chloroflexia;o__Kallotenuales;f__AKIW781;g__;s__	0.636668	0.139724	0.00835264	0.00553021	0.00424755	0.0152802
OTU_14	k__Bacteria;p__Actinobacteria;c__unidentified_Actinobacteria;o__Micromonosporales;f__Micromonosporaceae	0.637765	0.139231	0.0619265	0.0664661	0.0762357	0.0430777
OTU_166	k__Bacteria;p__Proteobacteria;c__Alphaproteobacteria;o__Rhizobiales;f__unidentified_Rhizobiales;g__Rhizomicrobium;s__	0.640763	0.137884	0.00371129	0.00139069	0.00279875	0.00694444
OTU_209	k__Bacteria;p__Proteobacteria;c__Alphaproteobacteria;o__Rhodospirillales;f__unidentified_Rhodospirillales;g__Reyranella;s__	0.648965	0.134221	0.215653	0.18131	0.239367	0.226282
OTU_286	k__Bacteria;p__Proteobacteria;c__Deltaproteobacteria;o__Myxococcales;f__Haliangiaceae;g__Haliangium;s__	0.65638	0.130936	0.0747232	0.0705546	0.124481	0.0291339
OTU_425	k__Bacteria;p__Gemmatimonadetes;c__unidentified_Gemmatimonadetes;o__Gemmatimonadales;f__Gemmatimonadaceae;g__;s__	0.658866	0.12984	0.0348594	0.0583762	0.0310002	0.0152017
OTU_164	k__Bacteria;p__Bacteroidetes;c__Sphingobacteriia;o__Sphingobacteriales;f__Chitinophagaceae;g__Flavisolibacter;s__	0.660726	0.129022	0.129438	0.127273	0.0985788	0.162462
OTU_328	k__Bacteria;p__Actinobacteria;c__Thermoleophilia;o__Gaiellales	0.66117	0.128827	0.0552792	0.0484663	0.0715446	0.0458267
OTU_32	k__Bacteria;p__Proteobacteria;c__Betaproteobacteria;o__Burkholderiales;f__Comamonadaceae;g__Azohydromonas;s__	0.663033	0.128009	1.28889	1.14402	1.14616	1.57649
OTU_983	k__Bacteria;p__Proteobacteria;c__Alphaproteobacteria;o__Rhizobiales;f__Xanthobacteraceae	0.678033	0.121483	0.00461469	0.00277324	0.00413616	0.00693466
OTU_40	k__Bacteria;p__Proteobacteria;c__Alphaproteobacteria;o__Rhizobiales;f__Hyphomicrobiaceae;g__Hyphomicrobium;s__Hyphomicrobium_zavarzinii	0.689897	0.116388	0.717695	0.840128	0.739391	0.573566
OTU_752	k__Bacteria;p__Cyanobacteria;c__Melainabacteria;o__Obscuribacterales;f__;g__;s__	0.692626	0.115225	0.00883578	0.00415912	0.0126767	0.00967149
OTU_255	k__Bacteria;p__Proteobacteria;c__Alphaproteobacteria;o__Sphingomonadales;f__Erythrobacteraceae	0.697854	0.113004	0.148048	0.203644	0.145921	0.0945796
OTU_214	k__Bacteria;p__Actinobacteria;c__Thermoleophilia;o__Solirubrobacterales;f__480-2;g__;s__	0.705751	0.109671	0.0161636	0.0165973	0.0207801	0.0111135
OTU_446	k__Bacteria;p__Acidobacteria;c__unidentified_Acidobacteria;o__Subgroup_3;f__unidentified_Acidobacteria;g__Candidatus_Solibacter;s__	0.708541	0.1085	0.025897	0.0276658	0.0181424	0.0318826
OTU_1503	k__Bacteria;p__Firmicutes;c__Negativicutes;o__Selenomonadales;f__Veillonellaceae;g__Veillonella;s__	0.717842	0.104615	0.00421186	0.00138255	0.00707925	0.0041738
OTU_537	k__Bacteria;p__Actinobacteria;c__unidentified_Actinobacteria;o__Pseudonocardiales;f__Pseudonocardiaceae;g__Pseudonocardia;s__Pseudonocardia_sulfidoxydans	0.726051	0.101215	0.0264288	0.0359937	0.0196529	0.0236396
OTU_247	k__Bacteria;p__Acidobacteria;c__unidentified_Acidobacteria;o__Acidobacteriales;f__Acidobacteriaceae_.Subgroup_1.;g__;s__	0.7266	0.100989	0.00369899	0.00277324	0.00276579	0.00555793
OTU_226	k__Bacteria;p__Acidobacteria;c__unidentified_Acidobacteria;o__Acidobacteriales;f__Acidobacteriaceae_.Subgroup_1.;g__Candidatus_Koribacter;s__	0.741173	0.0950184	0.00510013	0.00417206	0.00697621	0.00415213
OTU_24	k__Bacteria;p__Proteobacteria;c__Betaproteobacteria;o__Burkholderiales;f__Comamonadaceae;g__Ramlibacter;s__	0.746174	0.0929872	0.0722056	0.0623668	0.0695802	0.0846696
OTU_1175	k__Bacteria;p__Proteobacteria;c__Alphaproteobacteria;o__Caulobacterales;f__Caulobacteraceae;g__Brevundimonas	0.79806	0.0724333	0.7354	0.800263	0.622254	0.783682
OTU_1776	k__Bacteria;p__Proteobacteria;c__Alphaproteobacteria;o__Rhizobiales;f__Phyllobacteriaceae;g__Aminobacter;s__	0.807184	0.0689118	0.00647506	0.0097348	0.00552741	0.00416297
OTU_1040	k__Bacteria;p__Acidobacteria;c__unidentified_Acidobacteria;o__Subgroup_4;f__unidentified_Acidobacteria;g__Blastocatella;s__	0.809434	0.0680476	0.00464534	0.0027651	0.00421459	0.00695633
OTU_538	k__Bacteria;p__Firmicutes;c__Bacilli;o__Bacillales;f__Bacillaceae;g__Bacillus	0.810275	0.0677248	0.00554353	0.00415579	0.00552323	0.00695157
OTU_1374	k__Bacteria;p__Actinobacteria;c__Thermoleophilia;o__Solirubrobacterales	0.813223	0.0665957	0.00414093	0.00414286	0.00551906	0.00276087
OTU_1728	k__Bacteria;p__Actinobacteria;c__unidentified_Actinobacteria;o__Micromonosporales;f__Micromonosporaceae	0.814656	0.0660477	0.0041675	0.00553834	0.00418164	0.00278253
OTU_1797	k__Bacteria;p__Acidobacteria;c__unidentified_Acidobacteria;o__Subgroup_3;f__unidentified_Acidobacteria;g__Bryobacter;s__	0.82129	0.0635194	0.288094	0.274159	0.314138	0.275987
OTU_1247	k__Bacteria;p__Gemmatimonadetes;c__unidentified_Gemmatimonadetes;o__AT425-EubC11_terrestrial_group;f__;g__;s__	0.831025	0.0598335	0.00370964	0.0027651	0.00279875	0.00556506
OTU_722	k__Bacteria;p__Cyanobacteria;c__Chloroplast;o__unidentified_Chloroplast;f__unidentified_Chloroplast;g__unidentified_Chloroplast;s__Acutodesmus_obliquus	0.831579	0.0596249	0.0102181	0.00691276	0.0126438	0.0110976
OTU_83	k__Bacteria;p__Proteobacteria;c__Gammaproteobacteria;o__Xanthomonadales;f__unidentified_Xanthomonadales;g__Acidibacter	0.839533	0.056636	0.00740417	0.00832785	0.00832198	0.00556269
OTU_1102	k__Bacteria;p__Proteobacteria;c__Alphaproteobacteria;o__Rhodospirillales;f__Acetobacteraceae;g__Roseomonas	0.845356	0.05446	0.00415747	0.00414766	0.00279457	0.00553019
OTU_308	k__Bacteria;p__Actinobacteria;c__Acidimicrobiia;o__Acidimicrobiales;f__Iamiaceae;g__Iamia;s__	0.855527	0.0506829	0.0709023	0.0763642	0.0478915	0.0884513
OTU_1027	k__Bacteria;p__Cyanobacteria;c__Chloroplast;o__unidentified_Chloroplast;f__unidentified_Chloroplast;g__unidentified_Chloroplast;s__Watanabea_reniformis	0.869439	0.045565	0.00418723	0.00417206	0.0028317	0.00555793
OTU_781	k__Bacteria;p__Actinobacteria;c__unidentified_Actinobacteria;o__Propionibacteriales;f__Propionibacteriaceae;g__Propionibacterium;s__Propionibacterium_acnes	0.874072	0.0438728	0.00928976	0.00692756	0.00983669	0.011105
OTU_415	k__Bacteria;p__Actinobacteria;c__unidentified_Actinobacteria;o__Propionibacteriales;f__Nocardioidaceae;g__Nocardioides;s__	0.885038	0.0398907	0.0333345	0.0416622	0.0305593	0.027782
OTU_152	k__Bacteria;p__Proteobacteria;c__Betaproteobacteria;o__Rhodocyclales;f__Rhodocyclaceae;g__Methyloversatilis;s__	0.885259	0.0398107	0.149188	0.160539	0.149742	0.137284
OTU_274	k__Bacteria;p__Bacteroidetes;c__Flavobacteriia;o__Flavobacteriales	0.888602	0.0386036	0.0663316	0.0805496	0.062959	0.0554863
OTU_252	k__Bacteria;p__Proteobacteria;c__Gammaproteobacteria;o__Pseudomonadales;f__Pseudomonadaceae;g__Pseudomonas	0.890532	0.0379083	0.0946273	0.0942627	0.112226	0.0773936
OTU_1762	k__Bacteria;p__Actinobacteria;c__unidentified_Actinobacteria;o__Propionibacteriales;f__Nocardioidaceae;g__Nocardioides	0.905626	0.032503	0.00415649	0.00417206	0.00551488	0.00278253
OTU_461	k__Bacteria;p__Proteobacteria;c__Alphaproteobacteria;o__Rhizobiales;f__Methylobacteriaceae;g__Methylobacterium;s__Methylobacterium_aquaticum	0.907159	0.0319572	0.129307	0.117924	0.146433	0.123563
OTU_888	k__Bacteria;p__Proteobacteria;c__Alphaproteobacteria;o__Rhodospirillales	0.965986	0.011469	0.00697168	0.00829531	0.0056634	0.00695633
OTU_914	k__Bacteria;p__Proteobacteria;c__Alphaproteobacteria;o__Rhodospirillales;f__Acetobacteraceae	0.974418	0.00860099	0.00738271	0.00691463	0.00689778	0.00833571
OTU_477	k__Bacteria;p__Nitrospirae;c__Nitrospira;o__Nitrospirales;f__Nitrospiraceae	0.990147	0.00329511	0.0453523	0.0443641	0.0472895	0.0444032
OTU_227	k__Bacteria;p__Firmicutes;c__Bacilli;o__Bacillales;f__Alicyclobacillaceae	0.999987	4.26277e-06	0.00414685	0.00414619	0.00413616	0.00415821

## Sheet: Supplementary Table 2
Note: The average abundance and difference of bacterial taxa in each group and all soil samples. Significantly enriched OTUs with high effect size by both plants (highlighted in pink background), PN (highlighted in yellow background) and SG (highlighted in green background) in soil culture.
OTU_ID	Taxonomy	P values (corrected)	Effect size	Average (%)	PN (%)	SG (%)	CK (%)
OTU_128	k__Bacteria;p__Actinobacteria;c__unidentified_Actinobacteria;o__Frankiales	4.50837e-06	0.98348	0.342576	0.680495	0.311361	0.0358704
OTU_867	k__Bacteria;p__Actinobacteria;c__unidentified_Actinobacteria;o__Streptomycetales;f__Streptomycetaceae;g__Streptomyces	0.00010939	0.952175	1.86768	2.59235	2.07659	0.934102
OTU_82	k__Bacteria;p__Actinobacteria;c__unidentified_Actinobacteria;o__Frankiales;f__Frankiaceae;g__Jatrophihabitans;s__	0.00023113	0.938631	0.460178	0.772623	0.562351	0.0455598
OTU_1366	k__Bacteria;p__Actinobacteria;c__unidentified_Actinobacteria;o__Frankiales;f__Geodermatophilaceae;g__Modestobacter;s__	0.00071529	0.910568	0.067787	0.0908657	0.10835	0.00414559
OTU_1728	k__Bacteria;p__Actinobacteria;c__unidentified_Actinobacteria;o__Micromonosporales;f__Micromonosporaceae	0.000750395	0.909128	0.251847	0.394048	0.240047	0.121447
OTU_317	k__Bacteria;p__Actinobacteria;c__Acidimicrobiia;o__Acidimicrobiales;f__unidentified_Acidimicrobiales;g__unidentified_Acidimicrobiales	0.000805386	0.90696	0.154925	0.230005	0.200263	0.0345063
OTU_549	k__Bacteria;p__Actinobacteria;c__unidentified_Actinobacteria;o__Frankiales;f__Geodermatophilaceae;g__Geodermatophilus;s__	0.000818086	0.906474	0.081583	0.144603	0.0946303	0.00551569
OTU_167	k__Bacteria;p__Actinobacteria;c__unidentified_Actinobacteria;o__Frankiales;f__Acidothermaceae;g__Acidothermus;s__	0.00121216	0.893376	0.307084	0.374524	0.408715	0.138013
OTU_14	k__Bacteria;p__Actinobacteria;c__unidentified_Actinobacteria;o__Micromonosporales;f__Micromonosporaceae	0.00123294	0.89277	3.56424	4.70002	3.66867	2.32402
OTU_18	k__Bacteria;p__Proteobacteria;c__Betaproteobacteria;o__Burkholderiales;f__Burkholderiaceae;g__Ralstonia;s__Ralstonia_pickettii	0.00172323	0.880111	0.147209	0.267074	0.124821	0.0497314
OTU_219	k__Bacteria;p__Actinobacteria;c__Thermoleophilia;o__Solirubrobacterales;f__Conexibacteraceae;g__Conexibacter;s__	0.00185076	0.877223	0.122014	0.18457	0.112473	0.0689994
OTU_108	k__Bacteria;p__Proteobacteria;c__Betaproteobacteria;o__Burkholderiales;f__Burkholderiaceae;g__Cupriavidus;s__Cupriavidus_pauculus	0.00214508	0.871032	0.0637516	0.132188	0.0466394	0.0124274
OTU_421	k__Bacteria;p__Actinobacteria;c__unidentified_Actinobacteria;o__Micrococcales;f__Microbacteriaceae	0.0031183	0.853904	0.0971838	0.162496	0.112488	0.0165671
OTU_807	k__Bacteria;p__Proteobacteria;c__Alphaproteobacteria;o__Rhizobiales	0.0035044	0.848107	0.0344061	0.0675086	0.0274279	0.00828182
OTU_450	k__Bacteria;p__Actinobacteria;c__unidentified_Actinobacteria;o__Catenulisporales;f__Actinospicaceae;g__Actinospica;s__	4.82849e-05	0.963586	0.0578446	0.163915	0.00685431	0.00276488
OTU_188	k__Bacteria;p__Proteobacteria;c__Gammaproteobacteria;o__Xanthomonadales;f__Xanthomonadaceae;g__Lysobacter	6.82191e-05	0.95914	0.016527	0.0385789	0.00685668	0.00414559
OTU_471	k__Bacteria;p__Proteobacteria;c__Betaproteobacteria;o__Burkholderiales;f__Burkholderiaceae;g__Burkholderia;s__Burkholderia_kururiensis	0.000205033	0.941033	0.0353351	0.0867547	0.0123418	0.00690875
OTU_67	k__Bacteria;p__Firmicutes;c__Bacilli;o__Bacillales;f__Bacillaceae;g__Bacillus	0.00053283	0.918929	1.43031	2.7357	0.857127	0.698108
OTU_2	k__Bacteria;p__Cyanobacteria;c__Chloroplast;o__unidentified_Chloroplast;f__unidentified_Chloroplast;g__unidentified_Chloroplast	0.00338209	0.849895	0.0991497	0.296079	0.00137039	0
OTU_1692	k__Bacteria;p__Proteobacteria;c__Alphaproteobacteria;o__Rhodospirillales;f__DA111;g__;s__	0.000807012	0.906898	0.0298641	0.0744384	0.00411354	0.0110403
OTU_1057	k__Bacteria;p__Firmicutes;c__Clostridia;o__Clostridiales;f__Clostridiaceae_1;g__Clostridium_sensu_stricto_13;s__	0.000855568	0.905067	0.0114793	0.0261767	0.00274078	0.00552038
OTU_730	k__Bacteria;p__Proteobacteria;c__Alphaproteobacteria;o__Rhizobiales;f__Hyphomicrobiaceae;g__Pedomicrobium;s__	0.000909203	0.903123	0.0165175	0.0344116	0.00685905	0.00828182
OTU_1562	k__Bacteria;p__Firmicutes;c__Clostridia;o__Clostridiales;f__Lachnospiraceae;g__Lachnoclostridium_10;s__	0.00123261	0.89278	0.00229576	0.00688727	0	0
OTU_1863	k__Bacteria;p__Firmicutes;c__Clostridia;o__Clostridiales;f__Clostridiaceae_1;g__unidentified_Clostridiaceae_1;s__Clostridium_sp._SW002	0.00123261	0.89278	0.00229576	0.00688727	0	0
OTU_60	k__Bacteria;p__Firmicutes;c__Bacilli;o__Bacillales;f__Alicyclobacillaceae;g__Tumebacillus	0.00211159	0.871707	1.37245	2.5137	0.644576	0.959067
OTU_121	k__Bacteria;p__Firmicutes;c__Bacilli;o__Bacillales;f__Bacillaceae;g__Bacillus;s__Bacillus_anthracis	0.00211171	0.871704	0.335942	0.568854	0.189249	0.249724
OTU_1764	k__Bacteria;p__Firmicutes;c__Clostridia;o__Clostridiales;f__Clostridiaceae_1;g__Clostridium_sensu_stricto_1	0.00261699	0.862194	0.0334952	0.0605815	0.0192008	0.0207033
OTU_227	k__Bacteria;p__Firmicutes;c__Bacilli;o__Bacillales;f__Alicyclobacillaceae	0.00272225	0.860371	0.326266	0.577005	0.174164	0.227628
OTU_382	k__Bacteria;p__Proteobacteria;c__Deltaproteobacteria;o__Myxococcales;f__Polyangiaceae;g__Byssovorax;s__	0.00342494	0.849264	0.0537271	0.0964259	0.0178269	0.0469287
OTU_753	k__Bacteria;p__Saccharibacteria;c__;o__;f__;g__;s__	0.000680293	0.912051	0.00640179	0.00274887	0.0164565	0
OTU_1162	k__Bacteria;p__Cyanobacteria;c__Chloroplast;o__unidentified_Chloroplast;f__unidentified_Chloroplast;g__unidentified_Chloroplast	0.00281409	0.858818	0.138091	0.0453123	0.366196	0.00276488
OTU_309	k__Bacteria;p__Acidobacteria;c__unidentified_Acidobacteria;o__Subgroup_3;f__unidentified_Acidobacteria;g__Candidatus_Solibacter;s__	0.00180835	0.878168	0.5511	0.346975	0.763985	0.542339
OTU_256	k__Bacteria;p__Proteobacteria;c__Alphaproteobacteria;o__Rhodospirillales;f__Rhodospirillaceae;g__Inquilinus;s__	0.0021394	0.871146	0.0820321	0.0427234	0.138514	0.0648593
OTU_64	k__Bacteria;p__Acidobacteria;c__unidentified_Acidobacteria;o__Acidobacteriales;f__Acidobacteriaceae_.Subgroup_1.;g__Granulicella	0.00344065	0.849034	0.738755	0.497247	1.00405	0.714969
OTU_11	k__Bacteria;p__Firmicutes;c__Bacilli;o__Bacillales;f__Alicyclobacillaceae;g__Tumebacillus;s__	0.00393917	0.842069	5.24008	9.30898	2.90329	3.50799
OTU_1589	k__Bacteria;p__Proteobacteria;c__Deltaproteobacteria;o__Myxococcales;f__Polyangiaceae;g__Sorangium;s__	0.0041331	0.839518	0.00183853	0.00551558	0	0
OTU_842	k__Bacteria;p__Firmicutes;c__Bacilli;o__Bacillales;f__Paenibacillaceae;g__Paenibacillus	0.00447351	0.835228	0.0101029	0.0165344	0.00411472	0.00965957
OTU_254	k__Bacteria;p__Proteobacteria;c__Alphaproteobacteria;o__Sphingomonadales;f__Sphingomonadaceae;g__Sphingomonas;s__	0.00447738	0.835181	4.00672	2.89426	6.13099	2.99491
OTU_339	k__Bacteria;p__Actinobacteria;c__unidentified_Actinobacteria;o__Micrococcales;f__Micrococcaceae;g__Sinomonas;s__Sinomonas_atrocyanea	0.00375548	0.844563	0.0420895	0.0206556	0.102848	0.00276488
OTU_657	k__Bacteria;p__Firmicutes;c__Bacilli;o__Bacillales;f__Paenibacillaceae;g__Paenibacillus	0.00436284	0.836598	0.0357995	0.0606302	0.0246907	0.0220776
OTU_323	k__Bacteria;p__Actinobacteria;c__Acidimicrobiia;o__Acidimicrobiales;f__;g__;s__	0.00493144	0.829788	0.0885344	0.133568	0.0740768	0.0579587
OTU_44	k__Bacteria;p__Acidobacteria;c__unidentified_Acidobacteria;o__Subgroup_3;f__unidentified_Acidobacteria;g__Bryobacter;s__	0.00538886	0.82468	1.68203	1.89947	2.03548	1.11114
OTU_502	k__Bacteria;p__Proteobacteria;c__Betaproteobacteria;o__Burkholderiales;f__Burkholderiaceae;g__Burkholderia	0.00539884	0.824572	0.0448966	0.0509337	0.0685716	0.0151846
OTU_356	k__Bacteria;p__Actinobacteria;c__unidentified_Actinobacteria;o__Frankiales;f__Acidothermaceae;g__Acidothermus	0.00541798	0.824364	0.106882	0.165275	0.0973888	0.057983
OTU_139	k__Bacteria;p__Proteobacteria;c__Alphaproteobacteria;o__Rhizobiales;f__1174-901-12;g__;s__	0.00547363	0.823765	0.290266	0.444635	0.260592	0.165571
OTU_84	k__Bacteria;p__Proteobacteria;c__Alphaproteobacteria;o__Rhizobiales	0.00581613	0.820163	0.0335063	0.0675161	0.0233274	0.00967534
OTU_411	k__Bacteria;p__Actinobacteria;c__unidentified_Actinobacteria;o__Propionibacteriales;f__Nocardioidaceae;g__Aeromicrobium;s__	0.00611641	0.81712	0.0169521	0.0234272	0.0274291	0
OTU_430	k__Bacteria;p__Actinobacteria;c__Thermoleophilia;o__Solirubrobacterales;f__TM146;g__;s__	0.00654942	0.812903	0.0550021	0.0839578	0.0631007	0.0179478
OTU_12	k__Bacteria;p__Proteobacteria;c__Alphaproteobacteria;o__Rhizobiales;f__Bradyrhizobiaceae;g__Bradyrhizobium	0.00665592	0.811894	2.96861	4.14111	2.94183	1.82289
OTU_1874	k__Bacteria;p__Firmicutes;c__Clostridia;o__Clostridiales;f__Ruminococcaceae	0.00770519	0.802488	0.00596475	0.0137745	0.00274196	0.00137775
OTU_63	k__Bacteria;p__Actinobacteria;c__unidentified_Actinobacteria;o__Micrococcales;f__Microbacteriaceae;g__Lysinimonas;s__	0.00801778	0.799852	0.0559788	0.0991789	0.0452643	0.0234933
OTU_1557	k__Bacteria;p__Actinobacteria;c__unidentified_Actinobacteria;o__Streptosporangiales;f__Thermomonosporaceae;g__Actinoallomurus	0.00948912	0.78829	0.199466	0.304349	0.209847	0.0842012
OTU_125	k__Bacteria;p__Proteobacteria;c__Alphaproteobacteria;o__Rhizobiales;f__Methylobacteriaceae;g__Methylobacterium;s__Methylobacterium_radiotolerans	0.00957948	0.78762	0.118806	0.195586	0.101492	0.0593399
OTU_1063	k__Bacteria;p__Firmicutes;c__Bacilli;o__Bacillales;f__Bacillaceae;g__Bacillus	0.0100577	0.784143	0.0843813	0.184371	0.0384064	0.0303663
OTU_131	k__Bacteria;p__Bacteroidetes;c__Cytophagia;o__Cytophagales;f__Cytophagaceae;g__Siphonobacter;s__Siphonobacter_aquaeclarae	0.0122944	0.7692	0.00643188	0.0151689	0.00274433	0.00138244
OTU_74	k__Bacteria;p__Proteobacteria;c__Alphaproteobacteria;o__Sphingomonadales;f__Sphingomonadaceae;g__Sphingomonas	0.0123285	0.768987	0.214092	0.155789	0.340159	0.146329
OTU_1812	k__Bacteria;p__Firmicutes;c__Bacilli;o__Bacillales;f__Bacillaceae;g__Bacillus	0.0129372	0.765246	0.439263	0.763787	0.340179	0.213823
OTU_412	k__Bacteria;p__Firmicutes;c__Bacilli;o__Bacillales;f__Paenibacillaceae;g__Paenibacillus	0.0130386	0.764634	0.0577961	0.106004	0.0356574	0.0317266
OTU_629	k__Bacteria;p__Actinobacteria;c__unidentified_Actinobacteria;o__Frankiales;f__Acidothermaceae;g__Acidothermus;s__	0.013045	0.764595	0.0233858	0.0302966	0.0260587	0.0138022
OTU_1205	k__Bacteria;p__Actinobacteria;c__Thermoleophilia;o__Solirubrobacterales;f__0319-6M6;g__;s__	0.0132698	0.763251	0.010075	0.0165117	0.0137134	0
OTU_431	k__Bacteria;p__Actinobacteria;c__Thermoleophilia;o__Gaiellales;f__;g__;s__	0.0136994	0.760723	0.218756	0.265771	0.237286	0.153212
OTU_440	k__Bacteria;p__Proteobacteria;c__Alphaproteobacteria;o__Rhizobiales;f__Xanthobacteraceae;g__Variibacter;s__	0.0141921	0.757889	0.0279915	0.0454888	0.0246883	0.0137975
OTU_127	k__Bacteria;p__Actinobacteria;c__unidentified_Actinobacteria;o__Micromonosporales;f__Micromonosporaceae	0.015271	0.751902	0.399898	0.54662	0.399071	0.254003
OTU_300	k__Bacteria;p__Acidobacteria;c__unidentified_Acidobacteria;o__Subgroup_3;f__unidentified_Acidobacteria;g__Candidatus_Solibacter;s__	0.0155133	0.750597	0.0691891	0.0606584	0.126212	0.0206969
OTU_217	k__Bacteria;p__Chloroflexi;c__Ktedonobacteria;o__Ktedonobacterales	0.0159765	0.748139	0.112311	0.090957	0.164582	0.0813958
OTU_85	k__Bacteria;p__Chloroflexi;c__Ktedonobacteria;o__Ktedonobacterales;f__Ktedonobacteraceae;g__Ktedonobacter;s__	0.0166184	0.74481	1.06521	0.578901	2.10713	0.509596
OTU_571	k__Bacteria;p__Actinobacteria;c__unidentified_Actinobacteria;o__Micrococcales;f__Microbacteriaceae	0.0185949	0.73507	0.0357111	0.0261795	0.0754259	0.00552803
OTU_292	k__Bacteria;p__Acidobacteria;c__unidentified_Acidobacteria;o__Subgroup_3;f__unidentified_Acidobacteria;g__Candidatus_Solibacter;s__	0.0210042	0.724089	0.0751831	0.0964849	0.112493	0.0165718
OTU_160	k__Bacteria;p__Firmicutes;c__Erysipelotrichia;o__Erysipelotrichales;f__Erysipelotrichaceae;g__Asteroleplasma;s__	0.0218209	0.720558	0.209112	0.0925263	0.533428	0.00138244
OTU_1745	k__Bacteria;p__Actinobacteria;c__unidentified_Actinobacteria;o__Streptomycetales;f__Streptomycetaceae;g__Streptomyces	0.021945	0.72003	0.0316803	0.0606645	0.0233239	0.0110526
OTU_34	k__Bacteria;p__Proteobacteria;c__Alphaproteobacteria;o__Rhizobiales;f__Rhizobiaceae	0.0222365	0.718796	0.0422424	0.0923706	0.0246907	0.00966597
OTU_116	k__Bacteria;p__Actinobacteria;c__unidentified_Actinobacteria;o__Micrococcales;f__Intrasporangiaceae;g__Knoellia;s__	0.0223672	0.718246	0.0898527	0.139174	0.117956	0.0124274
OTU_42	k__Bacteria;p__Acidobacteria;c__unidentified_Acidobacteria;o__Subgroup_3;f__unidentified_Acidobacteria;g__Candidatus_Solibacter;s__	0.0236247	0.713062	1.12679	0.839407	1.73239	0.808578
OTU_151	k__Bacteria;p__Proteobacteria;c__Betaproteobacteria;o__Nitrosomonadales;f__Nitrosomonadaceae;g__Nitrosomonas;s__	0.0237531	0.712543	0.011016	0.0275525	0.00411472	0.00138072
OTU_59	k__Bacteria;p__Proteobacteria;c__Alphaproteobacteria;o__Rhodospirillales;f__Rhodospirillaceae;g__Azospirillum	0.0240125	0.7115	0.0316088	0.0398991	0.0452584	0.00966894
OTU_755	k__Bacteria;p__Actinobacteria;c__unidentified_Actinobacteria;o__Catenulisporales;f__Catenulisporaceae;g__Catenulispora;s__	0.0242735	0.710459	0.00917743	0.0179301	0.0096022	0
OTU_778	k__Bacteria;p__Firmicutes;c__Bacilli;o__Bacillales;f__Planococcaceae;g__Kurthia;s__Kurthia_gibsonii	0.025491	0.705696	0.0270315	0.0536427	0.0233156	0.00413622
OTU_210	k__Bacteria;p__Proteobacteria;c__Betaproteobacteria;o__Burkholderiales;f__Oxalobacteraceae;g__Herbaspirillum	0.0261442	0.703204	0.00550969	0.0124028	0.00274552	0.00138072
OTU_365	k__Bacteria;p__Thermomicrobia;c__unidentified_Thermomicrobia;o__JG30-KF-CM45;f__;g__;s__	0.0263883	0.702283	0.0018342	0.00413222	0.00137039	0
OTU_697	k__Bacteria;p__Firmicutes;c__Clostridia;o__Clostridiales;f__Clostridiaceae_1	0.0265045	0.701847	0.0536742	0.0799128	0.0479944	0.0331154
OTU_118	k__Bacteria;p__Proteobacteria;c__Alphaproteobacteria;o__Caulobacterales;f__Caulobacteraceae;g__;s__	0.0280405	0.696195	0.332957	0.611272	0.242729	0.14487
OTU_117	k__Bacteria;p__Proteobacteria;c__Alphaproteobacteria;o__Rhizobiales;f__Beijerinckiaceae	0.0282029	0.69561	0.286168	0.443299	0.235864	0.179341
OTU_313	k__Bacteria;p__Actinobacteria;c__Thermoleophilia;o__Gaiellales;f__;g__;s__	0.0291168	0.692356	0.117771	0.139009	0.156358	0.0579459
OTU_80	k__Bacteria;p__Proteobacteria;c__Alphaproteobacteria;o__Rhodospirillales;f__unidentified_Rhodospirillales;g__Reyranella;s__	0.0303382	0.688114	0.092167	0.0867492	0.11659	0.073162
OTU_347	k__Bacteria;p__Proteobacteria;c__Alphaproteobacteria;o__Rhodospirillales;f__Acetobacteraceae;g__Acidiphilium;s__	0.0308024	0.686531	0.106366	0.143144	0.111101	0.0648538
OTU_222	k__Bacteria;p__Proteobacteria;c__Alphaproteobacteria;o__Rhodospirillales;f__CCU22;g__;s__	0.033272	0.678368	0.0142475	0.0372539	0.00548867	0
OTU_65	k__Bacteria;p__Proteobacteria;c__Alphaproteobacteria;o__Sphingomonadales;f__Sphingomonadaceae;g__Sphingosinicella;s__	0.0336003	0.677313	0.0578143	0.103331	0.0480086	0.0221032
OTU_270	k__Bacteria;p__Proteobacteria;c__Gammaproteobacteria;o__Xanthomonadales;f__;g__;s__	0.033736	0.676879	0.00781702	0.0220795	0.00137157	0
OTU_76	k__Bacteria;p__Proteobacteria;c__Gammaproteobacteria;o__Xanthomonadales;f__Xanthomonadaceae;g__Xanthomonas	0.0340248	0.67596	0.0215571	0.0454064	0.0109738	0.00829119
OTU_416	k__Bacteria;p__Proteobacteria;c__Betaproteobacteria;o__Burkholderiales;f__Oxalobacteraceae;g__Massilia	0.0367331	0.667581	0.0550123	0.0866937	0.0521233	0.0262198
OTU_1441	k__Bacteria;p__Firmicutes;c__Bacilli;o__Bacillales;f__Paenibacillaceae;g__Paenibacillus	0.0373661	0.665682	0.0215466	0.0440134	0.012343	0.00828354
OTU_279	k__Bacteria;p__Actinobacteria;c__Thermoleophilia;o__Solirubrobacterales	0.0375418	0.665159	0.0993854	0.127909	0.146776	0.0234707
OTU_23	k__Bacteria;p__Actinobacteria;c__Acidimicrobiia;o__Acidimicrobiales;f__;g__;s__	0.0389812	0.660933	0.134048	0.253718	0.111112	0.0373155
OTU_527	k__Bacteria;p__Proteobacteria;c__Alphaproteobacteria;o__Rhizobiales;f__Rhizobiaceae;g__Rhizobium	0.039065	0.660691	0.012861	0.0275889	0.00685787	0.00413622
OTU_94	k__Bacteria;p__Actinobacteria;c__unidentified_Actinobacteria;o__Micrococcales;f__Micrococcaceae;g__Arthrobacter;s__Arthrobacter_ureafaciens	0.0401181	0.657668	0.0459299	0.0896052	0.0246883	0.0234963
OTU_58	k__Bacteria;p__Proteobacteria;c__Alphaproteobacteria;o__Rhizobiales;f__Rhizobiaceae;g__Rhizobium;s__Rhizobium_rhizogenes	0.0408249	0.65567	0.147592	0.239609	0.178299	0.0248689
OTU_13	k__Bacteria;p__Actinobacteria;c__unidentified_Actinobacteria;o__Streptomycetales;f__Streptomycetaceae;g__Streptomyces;s__Streptomyces_scabiei	0.0426644	0.650574	0.365074	0.703534	0.274351	0.117336
OTU_1056	k__Bacteria;p__Firmicutes;c__Bacilli;o__Bacillales;f__Alicyclobacillaceae;g__Tumebacillus	0.0427744	0.650274	0.00734123	0.0179054	0.00411828	0
OTU_229	k__Bacteria;p__WD272;c__;o__;f__;g__;s__	0.0443665	0.645988	0.144829	0.118466	0.233213	0.0828088
OTU_633	k__Bacteria;p__Firmicutes;c__Bacilli;o__Bacillales;f__Paenibacillaceae;g__Paenibacillus	0.0448397	0.644734	0.0426442	0.0660806	0.0370277	0.0248242
OTU_461	k__Bacteria;p__Proteobacteria;c__Alphaproteobacteria;o__Rhizobiales;f__Methylobacteriaceae;g__Methylobacterium;s__Methylobacterium_aquaticum	0.0453592	0.643367	0.0229177	0.0344226	0.0274267	0.0069036
OTU_1147	k__Bacteria;p__Actinobacteria;c__Thermoleophilia;o__Solirubrobacterales;f__YNPFFP1;g__;s__	0.0461789	0.641231	0.0228936	0.0329994	0.031545	0.00413622
OTU_168	k__Bacteria;p__Chloroflexi;c__Ktedonobacteria;o__Ktedonobacterales;f__Ktedonobacteraceae;g__Ktedonobacter;s__bacterium_SOSP1-79	0.046732	0.639805	0.344278	0.231635	0.58161	0.219588
OTU_472	k__Bacteria;p__Firmicutes;c__Bacilli;o__Bacillales;f__Alicyclobacillaceae;g__Tumebacillus;s__	0.00515672	0.827234	0.237335	0.439572	0.115201	0.157232
OTU_1221	k__Bacteria;p__Chloroflexi;c__Ktedonobacteria;o__Ktedonobacterales	0.00574792	0.820869	0.0068644	0.00137169	0.0164601	0.00276144
OTU_159	k__Bacteria;p__Firmicutes;c__Bacilli;o__Bacillales;f__Bacillaceae;g__Bacillus	0.00587415	0.819567	0.286806	0.556381	0.142629	0.161408
OTU_1142	k__Bacteria;p__Chloroflexi;c__TK10	0.0065516	0.812882	0.00643221	0.0110195	0	0.00827713
OTU_1195	k__Bacteria;p__Firmicutes;c__Bacilli;o__Bacillales;f__Paenibacillaceae;g__Paenibacillus;s__Paenibacillus_graminis	0.0069507	0.809157	0.0234009	0.0371783	0.0164636	0.0165607
OTU_715	k__Bacteria;p__Chloroflexi;c__Ktedonobacteria;o__Ktedonobacterales	0.00763187	0.803116	0.0114578	0.00689276	0.0205736	0.00690703
OTU_387	k__Bacteria;p__Cyanobacteria;c__Chloroplast;o__unidentified_Chloroplast;f__unidentified_Chloroplast;g__unidentified_Chloroplast	0.00804564	0.79962	0.0055133	0.0165399	0	0
OTU_816	k__Bacteria;p__Firmicutes;c__OPB54	0.00917285	0.790668	0.00688647	0.01378	0.00274315	0.00413622
OTU_1158	k__Bacteria;p__Chloroflexi;c__Ktedonobacteria;o__JG30-KF-AS9;f__;g__;s__	0.00941016	0.788879	0.00549632	0.00138336	0.0123442	0.00276144
OTU_77	k__Bacteria;p__Acidobacteria;c__unidentified_Acidobacteria;o__Subgroup_3;f__unidentified_Acidobacteria;g__Bryobacter;s__	0.0105999	0.780332	0.367217	0.479421	0.253754	0.368475
OTU_615	k__Bacteria;p__Proteobacteria;c__Gammaproteobacteria;o__Legionellales;f__Legionellaceae;g__Legionella	0.0112511	0.775923	0.0027584	0.00689276	0	0.00138244
OTU_1015	k__Bacteria;p__Firmicutes;c__Bacilli;o__Bacillales;f__Alicyclobacillaceae;g__Alicyclobacillus	0.0112945	0.775635	0.00689099	0.0151634	0.00137039	0.00413919
OTU_343	k__Bacteria;p__Firmicutes;c__Clostridia;o__Clostridiales;f__Clostridiaceae_1;g__Clostridium_sensu_stricto_1;s__Clostridium_beijerinckii	0.0131653	0.763874	0.0982615	0.170888	0.0521233	0.0717729
OTU_546	k__Bacteria;p__Firmicutes;c__Clostridia;o__Clostridiales;f__Clostridiaceae_1;g__Clostridium_sensu_stricto_8;s__	0.013811	0.760075	0.0468485	0.0882417	0.0205724	0.0317312
OTU_1096	k__Bacteria;p__Chloroflexi;c__Ktedonobacteria;o__Ktedonobacterales;f__Thermosporotrichaceae;g__;s__	0.0143989	0.756718	0.027925	0.00826927	0.0658403	0.00966551
OTU_1719	k__Bacteria;p__Proteobacteria;c__Deltaproteobacteria;o__Myxococcales;f__Polyangiaceae;g__Byssovorax;s__	0.0149093	0.753877	0.0178938	0.0302739	0.0096022	0.0138052
OTU_402	k__Bacteria;p__Firmicutes;c__Clostridia;o__Clostridiales;f__Peptostreptococcaceae;g__Peptoclostridium;s__Clostridium_bifermentans	0.0152152	0.752205	0.0601602	0.107517	0.026054	0.046909
OTU_508	k__Bacteria;p__Firmicutes;c__Bacilli;o__Bacillales;f__Paenibacillaceae;g__Paenibacillus	0.016398	0.745943	0.0472646	0.0867458	0.0205689	0.0344791
OTU_1258	k__Bacteria;p__Proteobacteria;c__Deltaproteobacteria;o__Myxococcales;f__Haliangiaceae;g__Haliangium;s__	0.0170629	0.742555	0.0169918	0.0275415	0.00411472	0.0193191
OTU_813	k__Bacteria;p__Acidobacteria;c__unidentified_Acidobacteria;o__Acidobacteriales;f__Acidobacteriaceae_.Subgroup_1.;g__Granulicella;s__	0.0171389	0.742173	0.0155806	0.00826445	0.0260563	0.012421
OTU_289	k__Bacteria;p__Firmicutes;c__Bacilli;o__Bacillales;f__Alicyclobacillaceae;g__Alicyclobacillus	0.0174969	0.740391	0.0734678	0.135078	0.0342787	0.0510466
OTU_186	k__Bacteria;p__Acidobacteria;c__unidentified_Acidobacteria;o__Subgroup_3	0.0179057	0.738385	0.142286	0.206718	0.104242	0.115899
OTU_905	k__Bacteria;p__Firmicutes;c__Clostridia;o__Clostridiales;f__Ruminococcaceae;g__Ruminiclostridium_1;s__	0.0180971	0.737456	0.0114799	0.0165117	0.00274196	0.0151859
OTU_102	k__Bacteria;p__Acidobacteria;c__unidentified_Acidobacteria;o__Subgroup_3;f__unidentified_Acidobacteria;g__Candidatus_Solibacter;s__	0.0182724	0.73661	1.50993	0.897932	1.86542	1.76644
OTU_704	k__Bacteria;p__Firmicutes;c__Bacilli;o__Bacillales;f__Paenibacillaceae;g__Paenibacillus	0.0185635	0.735219	0.0156009	0.0302856	0.00823181	0.00828525
OTU_1092	k__Bacteria;p__Proteobacteria;c__Deltaproteobacteria;o__Myxococcales;f__Phaselicystidaceae;g__Phaselicystis;s__	0.0187391	0.734387	0.0100942	0.0206378	0.00274078	0.00690407
OTU_923	k__Bacteria;p__Chloroflexi;c__Ktedonobacteria;o__JG30-KF-AS9;f__;g__;s__	0.0220384	0.719633	0.00549672	0.00137718	0.0109738	0.00413919
OTU_805	k__Bacteria;p__Firmicutes;c__Bacilli;o__Bacillales;f__Alicyclobacillaceae;g__Alicyclobacillus;s__	0.0238817	0.712025	0.0133314	0.0330996	0	0.0068947
OTU_381	k__Bacteria;p__Firmicutes;c__Clostridia;o__Clostridiales;f__Clostridiaceae_1;g__;s__	0.0243185	0.71028	0.0523691	0.0882417	0.0205772	0.0482885
OTU_152	k__Bacteria;p__Proteobacteria;c__Betaproteobacteria;o__Rhodocyclales;f__Rhodocyclaceae;g__Methyloversatilis;s__	0.0243992	0.70996	0.00781396	0.0192963	0	0.00414559
OTU_630	k__Bacteria;p__Firmicutes;c__Clostridia;o__Clostridiales;f__Clostridiaceae_1;g__Clostridium_sensu_stricto_3;s__	0.0261428	0.703209	0.0252653	0.0482555	0.0109702	0.01657
OTU_409	k__Bacteria;p__Firmicutes;c__Bacilli;o__Bacillales;f__Alicyclobacillaceae;g__Tumebacillus;s__	0.0275549	0.697959	0.0670412	0.111598	0.023312	0.0662133
OTU_1143	k__Bacteria;p__Firmicutes;c__Erysipelotrichia;o__Erysipelotrichales;f__Erysipelotrichaceae;g__Asteroleplasma;s__	0.0291335	0.692298	0.00411551	0	0.0123465	0
OTU_325	k__Bacteria;p__Firmicutes;c__Bacilli;o__Bacillales;f__Alicyclobacillaceae;g__Alicyclobacillus	0.0299826	0.689337	0.0876504	0.12943	0.0521151	0.0814061
OTU_280	k__Bacteria;p__Acidobacteria;c__unidentified_Acidobacteria;o__Subgroup_3;f__unidentified_Acidobacteria;g__Candidatus_Solibacter	0.0300592	0.689072	0.163667	0.0935651	0.224956	0.17248
OTU_1357	k__Bacteria;p__Thermomicrobia;c__unidentified_Thermomicrobia;o__JG30-KF-CM45;f__;g__;s__	0.0316522	0.683674	0.00229671	0.00550941	0	0.00138072
OTU_1289	k__Bacteria;p__Proteobacteria;c__Alphaproteobacteria;o__Rhizobiales;f__Xanthobacteraceae;g__Variibacter;s__	0.031913	0.682808	0.357631	0.446216	0.411439	0.215237
OTU_497	k__Bacteria;p__Proteobacteria;c__Alphaproteobacteria;o__Rhizobiales;f__Methylocystaceae;g__Pleomorphomonas;s__	0.0322241	0.68178	0.00229877	0.00551558	0	0.00138072
OTU_327	k__Bacteria;p__Chloroflexi;c__Ktedonobacteria;o__JG30-KF-AS9;f__;g__;s__	0.032691	0.680251	0.143051	0.0882143	0.230439	0.1105
OTU_810	k__Bacteria;p__Proteobacteria;c__Alphaproteobacteria;o__Rhodospirillales;f__Rhodospirillaceae;g__Elstera;s__	0.0327611	0.680023	0.0132889	0.011025	0.021944	0.00689766
OTU_442	k__Bacteria;p__Firmicutes;c__Clostridia;o__Clostridiales;f__Clostridiaceae_1;g__Clostridium_sensu_stricto_12	0.0331165	0.67887	0.128098	0.197088	0.0754271	0.111778
OTU_1137	k__Bacteria;p__Firmicutes;c__Clostridia;o__Clostridiales	0.0353905	0.671681	0.0133279	0.0275765	0.00137276	0.0110344
OTU_1553	k__Bacteria;p__Firmicutes;c__Erysipelotrichia;o__Erysipelotrichales;f__Erysipelotrichaceae;g__Turicibacter;s__	0.035715	0.670681	0.0105552	0.0192716	0.00548985	0.00690407
OTU_1671	k__Bacteria;p__Acidobacteria;c__unidentified_Acidobacteria;o__Subgroup_5;f__;g__;s__	0.0363284	0.668806	0.00594883	0.00137169	0.0137134	0.00276144
OTU_88	k__Bacteria;p__Firmicutes;c__Bacilli;o__Bacillales;f__Paenibacillaceae;g__Oxalophagus;s__	0.0382977	0.662927	0.998084	1.68472	0.611685	0.697848
OTU_372	k__Bacteria;p__Firmicutes;c__Bacilli;o__Bacillales;f__Paenibacillaceae	0.0404187	0.656816	0.066511	0.115623	0.0384017	0.0455088
OTU_9	k__Bacteria;p__Bacteroidetes;c__Sphingobacteriia;o__Sphingobacteriales;f__Sphingobacteriaceae;g__Mucilaginibacter	0.0408045	0.655727	1.83491	0.9931	3.18671	1.32491
OTU_702	k__Bacteria;p__Firmicutes;c__Bacilli;o__Bacillales;f__Paenibacillaceae;g__Paenibacillus	0.0431564	0.649236	0.0472394	0.0797968	0.028803	0.0331184
OTU_149	k__Bacteria;p__Proteobacteria;c__Alphaproteobacteria;o__Rickettsiales;f__Mitochondria;g__unidentified_Mitochondria;s__Aegilops_tauschii	0.047753	0.6372	0.0229747	0.0689242	0	0
OTU_303	k__Bacteria;p__Chloroflexi;c__Ktedonobacteria;o__Ktedonobacterales;f__Thermosporotrichaceae;g__;s__	0.0482413	0.635968	0.211154	0.0648214	0.474723	0.0939174
OTU_29	k__Bacteria;p__Proteobacteria;c__Alphaproteobacteria;o__Rhodospirillales	0.0485737	0.635134	1.40228	2.27185	0.855733	1.07926
OTU_494	k__Bacteria;p__Chloroflexi;c__Ktedonobacteria;o__Ktedonobacterales	0.0487519	0.634688	0.0683205	0.0344892	0.117973	0.0524992
OTU_935	k__Bacteria;p__Proteobacteria;c__Gammaproteobacteria	2.56457e-17	0.999997	0.00690152	0	0	0.0207045
OTU_1463	k__Bacteria;p__Saccharibacteria;c__;o__;f__;g__;s__	2.56457e-17	0.999997	0.00276061	0	0	0.00828182
OTU_132	k__Bacteria;p__Acidobacteria;c__unidentified_Acidobacteria;o__Acidobacteriales;f__Acidobacteriaceae_.Subgroup_1.;g__;s__	1.22396e-06	0.989303	0.64471	0.272791	0.315462	1.34588
OTU_470	k__Bacteria;p__Proteobacteria;c__Gammaproteobacteria	1.79712e-06	0.987842	0.0289705	0	0.00822944	0.078682
OTU_112	k__Bacteria;p__Acidobacteria;c__unidentified_Acidobacteria;o__Acidobacteriales;f__Acidobacteriaceae_.Subgroup_1.;g__;s__	5.56799e-06	0.982276	0.589251	0.158326	0.20024	1.40919
OTU_871	k__Bacteria;p__Chloroflexi;c__JG37-AG-4;o__;f__;g__;s__	3.84599e-05	0.966245	0.0197614	0	0.00960102	0.0496833
OTU_220	k__Bacteria;p__Saccharibacteria;c__unidentified_Saccharibacteria;o__unidentified_Saccharibacteria;f__unidentified_Saccharibacteria;g__unidentified_Saccharibacteria	4.98111e-05	0.963206	0.144212	0.0620486	0.115212	0.255374
OTU_439	k__Bacteria;p__Proteobacteria;c__Deltaproteobacteria;o__Oligoflexales;f__unidentified_Oligoflexales;g__unidentified_Oligoflexales;s__bacterium_enrichment_culture_clone_auto112_4W	7.5884e-05	0.957663	0.0510363	0.0178889	0.00823062	0.126989
OTU_561	k__Bacteria;p__Proteobacteria;c__Gammaproteobacteria;o__Legionellales;f__Coxiellaceae;g__Coxiella	8.5972e-05	0.955865	0.0211547	0.00274337	0	0.0607206
OTU_31	k__Archaea;p__Thaumarchaeota;c__.SCG.;o__unidentified_.SCG.;f__unidentified_.SCG.;g__Candidatus_Nitrososphaera;s__	9.41415e-05	0.954509	0.761728	0.00276671	0.0054863	2.27693
OTU_1087	k__Bacteria;p__Proteobacteria;c__Deltaproteobacteria;o__Myxococcales;f__Haliangiaceae;g__Haliangium;s__	0.000110524	0.95201	0.0298847	0.00828161	0.00959983	0.0717727
OTU_314	k__Bacteria;p__Acidobacteria;c__unidentified_Acidobacteria;o__Acidobacteriales;f__Acidobacteriaceae_.Subgroup_1.;g__;s__	0.000143223	0.94768	0.091033	0.0179006	0.0219428	0.233256
OTU_600	k__Bacteria;p__TM6;c__;o__;f__;g__;s__	0.000152215	0.946607	0.0147272	0	0	0.0441816
OTU_1132	k__Bacteria;p__Proteobacteria;c__Alphaproteobacteria;o__Rickettsiales	0.000184409	0.943081	0.00321986	0	0	0.00965957
OTU_789	k__Bacteria;p__Proteobacteria;c__Gammaproteobacteria	0.000301449	0.932949	0.00781944	0	0	0.0234583
OTU_73	k__Bacteria;p__Gemmatimonadetes;c__unidentified_Gemmatimonadetes;o__Gemmatimonadales;f__Gemmatimonadaceae;g__Gemmatimonas;s__	0.000306739	0.932559	0.629404	0.227325	0.322276	1.33861
OTU_271	k__Bacteria;p__Bacteroidetes;c__Sphingobacteriia;o__Sphingobacteriales;f__env.OPS_17;g__;s__	0.000351535	0.929424	0.0735883	0.0041384	0.0123418	0.204285
OTU_1163	k__Bacteria;p__Acidobacteria;c__unidentified_Acidobacteria;o__Subgroup_2;f__;g__;s__	0.00035955	0.928892	0.00781795	0.00137718	0.00137039	0.0207063
OTU_228	k__Bacteria;p__Nitrospirae;c__Nitrospira;o__Nitrospirales;f__Nitrospiraceae	0.000396106	0.926559	0.0478128	0.00963681	0.00822825	0.125573
OTU_670	k__Bacteria;p__Proteobacteria;c__Deltaproteobacteria;o__Myxococcales;f__Haliangiaceae;g__Haliangium;s__	0.000479977	0.921704	0.0216089	0.0096533	0.00686142	0.0483119
OTU_50	k__Bacteria;p__Proteobacteria;c__Alphaproteobacteria;o__Rhodospirillales;f__I-10;g__;s__	0.000482911	0.921545	0.361044	0.252036	0.187866	0.64323
OTU_10	k__Bacteria;p__Acidobacteria;c__unidentified_Acidobacteria;o__Acidobacteriales;f__Acidobacteriaceae_.Subgroup_1.;g__unidentified_Acidobacteria;s__bacterium_Ellin7538	0.000521704	0.919498	2.03706	1.05675	1.77743	3.277
OTU_122	k__Bacteria;p__Gemmatimonadetes;c__unidentified_Gemmatimonadetes;o__Gemmatimonadales;f__Gemmatimonadaceae	0.000530406	0.919053	0.225705	0.0606405	0.0658332	0.550641
OTU_688	k__Bacteria;p__Proteobacteria;c__Alphaproteobacteria;o__Rhizobiales;f__unidentified_Rhizobiales;g__Rhizomicrobium;s__	0.000576973	0.91675	0.0105801	0	0.00137276	0.0303676
OTU_1062	k__Bacteria;p__Proteobacteria;c__Deltaproteobacteria;o__GR-WP33-30;f__;g__;s__	0.000604803	0.915432	0.0101093	0.00274337	0.00274196	0.0248425
OTU_87	k__Bacteria;p__Gemmatimonadetes;c__unidentified_Gemmatimonadetes;o__Gemmatimonadales;f__Gemmatimonadaceae;g__Gemmatimonas;s__	0.000686084	0.911802	0.31922	0.0812955	0.21662	0.659745
OTU_350	k__Bacteria;p__Bacteroidetes;c__Sphingobacteriia;o__Sphingobacteriales;f__Chitinophagaceae;g__;s__	0.000704575	0.911017	0.0546507	0.0123678	0.0370396	0.114545
OTU_1207	k__Bacteria;p__Proteobacteria;c__Deltaproteobacteria;o__GR-WP33-30;f__;g__;s__	0.000712032	0.910704	0.00505941	0	0	0.0151782
OTU_247	k__Bacteria;p__Acidobacteria;c__unidentified_Acidobacteria;o__Acidobacteriales;f__Acidobacteriaceae_.Subgroup_1.;g__;s__	0.00074499	0.909347	0.376474	0.206511	0.28389	0.639022
OTU_95	k__Bacteria;p__Acidobacteria;c__unidentified_Acidobacteria;o__Acidobacteriales;f__Acidobacteriaceae_.Subgroup_1.;g__;s__	0.000926724	0.902505	0.314445	0.147182	0.245509	0.550645
OTU_276	k__Bacteria;p__Gemmatimonadetes;c__unidentified_Gemmatimonadetes;o__Gemmatimonadales;f__Gemmatimonadaceae;g__;s__	0.000983574	0.900551	0.080436	0.0151394	0.021944	0.204225
OTU_20	k__Bacteria;p__Gemmatimonadetes;c__unidentified_Gemmatimonadetes;o__Gemmatimonadales;f__Gemmatimonadaceae;g__Gemmatimonas;s__	0.00106511	0.897875	1.34762	0.359459	0.818726	2.86469
OTU_388	k__Bacteria;p__Chlamydiae;c__unidentified_Chlamydiae;o__Chlamydiales;f__Parachlamydiaceae;g__Neochlamydia;s__	0.00106893	0.897753	0.0344937	0.00137718	0.00137157	0.100732
OTU_929	k__Bacteria;p__Acidobacteria;c__unidentified_Acidobacteria;o__Acidobacteriales;f__Acidobacteriaceae_.Subgroup_1.	0.00110956	0.896474	0.143224	0.0936653	0.120681	0.215327
OTU_1144	k__Bacteria;p__Proteobacteria;c__Deltaproteobacteria;o__GR-WP33-30;f__unidentified_GR-WP33-30;g__unidentified_GR-WP33-30;s__bacterium_enrichment_culture_clone_B126.2011.	0.00122649	0.892958	0.00460073	0	0	0.0138022
OTU_293	k__Bacteria;p__Proteobacteria;c__Alphaproteobacteria;o__Rhizobiales;f__unidentified_Rhizobiales;g__Rhizomicrobium;s__	0.00123691	0.892656	0.064414	0.00415007	0.0109785	0.178113
OTU_1083	k__Bacteria;p__Proteobacteria;c__Deltaproteobacteria;o__Bdellovibrionales;f__Bdellovibrionaceae;g__Bdellovibrio;s__	0.00125203	0.89222	0.00230136	0	0	0.00690407
OTU_1261	k__Bacteria;p__Gemmatimonadetes;c__unidentified_Gemmatimonadetes;o__Gemmatimonadales;f__Gemmatimonadaceae;g__;s__	0.00125203	0.89222	0.00460271	0	0	0.0138081
OTU_1564	k__Bacteria;p__Proteobacteria;c__Alphaproteobacteria;o__Rhodospirillales;f__Rhodospirillaceae	0.00125203	0.89222	0.00230136	0	0	0.00690407
OTU_399	k__Bacteria;p__Nitrospirae;c__Nitrospira;o__Nitrospirales;f__Nitrospiraceae;g__unidentified_Nitrospiraceae;s__Nitrospira_japonica	0.00140543	0.887987	0.0354149	0.00138336	0.00274552	0.102116
OTU_307	k__Bacteria;p__Acidobacteria;c__unidentified_Acidobacteria;o__Subgroup_6;f__;g__;s__	0.00201094	0.873779	0.0560987	0.00689826	0.00685905	0.154539
OTU_566	k__Bacteria;p__Gemmatimonadetes;c__unidentified_Gemmatimonadetes;o__Gemmatimonadales;f__Gemmatimonadaceae	0.002086	0.872227	0.0137943	0.00550941	0	0.0358734
OTU_1308	k__Bacteria;p__Proteobacteria;c__Deltaproteobacteria;o__Myxococcales;f__Haliangiaceae;g__Haliangium;s__	0.00214462	0.871041	0.0335836	0.00689826	0.00548392	0.0883687
OTU_226	k__Bacteria;p__Acidobacteria;c__unidentified_Acidobacteria;o__Acidobacteriales;f__Acidobacteriaceae_.Subgroup_1.;g__Candidatus_Koribacter;s__	0.00249791	0.864317	0.301433	0.152778	0.330566	0.420956
OTU_768	k__Bacteria;p__Gemmatimonadetes;c__unidentified_Gemmatimonadetes;o__Gemmatimonadales;f__Gemmatimonadaceae;g__Gemmatimonas;s__	0.00255115	0.86336	0.01471	0.00275437	0.00274078	0.0386348
OTU_171	k__Bacteria;p__Proteobacteria;c__Alphaproteobacteria;o__Rhodospirillales;f__DA111;g__;s__	0.00265996	0.861444	0.191719	0.024783	0.0342893	0.516084
OTU_277	k__Bacteria;p__Proteobacteria;c__Alphaproteobacteria;o__Rhodospirillales;f__DA111;g__;s__	0.00272576	0.860311	0.088206	0.048132	0.028803	0.187683
OTU_1091	k__Bacteria;p__Proteobacteria;c__Deltaproteobacteria;o__Myxococcales;f__Cystobacteraceae	0.00279599	0.859121	0.0045994	0.00137718	0	0.012421
OTU_539	k__Bacteria;p__Proteobacteria;c__Gammaproteobacteria	0.00361017	0.846594	0.0216223	0	0.00137276	0.063494
OTU_1801	k__Bacteria	0.00385434	0.843211	0.00183955	0	0	0.00551866
OTU_1693	k__Bacteria;p__Acidobacteria;c__unidentified_Acidobacteria;o__Subgroup_3;f__unidentified_Acidobacteria;g__Candidatus_Solibacter;s__	0.00386381	0.843082	0.105178	0.0482164	0.0699396	0.197378
OTU_1045	k__Bacteria;p__Proteobacteria;c__Deltaproteobacteria;o__Myxococcales;f__Haliangiaceae;g__Haliangium;s__	0.00395004	0.841924	0.00184054	0	0	0.00552163
OTU_1560	k__Bacteria;p__Proteobacteria;c__Deltaproteobacteria;o__Myxococcales	0.00395004	0.841924	0.00184054	0	0	0.00552163
OTU_1658	k__Bacteria;p__Acidobacteria;c__unidentified_Acidobacteria;o__Subgroup_2;f__;g__;s__	0.00395004	0.841924	0.00368109	0	0	0.0110433
OTU_727	k__Bacteria;p__TM6;c__;o__;f__;g__;s__	0.00395004	0.841924	0.00736217	0	0	0.0220865
OTU_1459	k__Bacteria;p__Proteobacteria;c__Betaproteobacteria;o__Burkholderiales;f__Comamonadaceae	0.00400609	0.841179	0.00184112	0	0	0.00552335
OTU_1588	k__Bacteria;p__Proteobacteria;c__Gammaproteobacteria;o__Legionellales;f__Coxiellaceae;g__Aquicella;s__	0.00400609	0.841179	0.00184112	0	0	0.00552335
OTU_662	k__Bacteria;p__Acidobacteria;c__unidentified_Acidobacteria;o__Subgroup_6;f__;g__;s__	0.00432868	0.837026	0.0197489	0.00550391	0.0150921	0.0386506
OTU_250	k__Bacteria;p__Acidobacteria;c__unidentified_Acidobacteria;o__Acidobacteriales;f__Acidobacteriaceae_.Subgroup_1.	0.00468135	0.832715	0.104799	0.0358719	0.0384041	0.240121
OTU_282	k__Bacteria;p__Proteobacteria;c__Gammaproteobacteria;o__Xanthomonadales;f__unidentified_Xanthomonadales;g__Acidibacter;s__	0.00495071	0.829566	0.0937589	0.0288912	0.0164601	0.235925
OTU_741	k__Bacteria;p__Acidobacteria;c__unidentified_Acidobacteria;o__Subgroup_2;f__;g__;s__	0.00537696	0.824809	0.0114898	0	0.00686024	0.0276091
OTU_239	k__Bacteria;p__Proteobacteria;c__Alphaproteobacteria;o__Rhodospirillales;f__DA111;g__;s__	0.00558973	0.822528	0.103413	0.0413277	0.0219475	0.246964
OTU_374	k__Bacteria;p__Nitrospirae;c__Nitrospira;o__Nitrospirales;f__Nitrospiraceae;g__;s__	0.00579723	0.820358	0.0395459	0.00552725	0.00548392	0.107626
OTU_56	k__Bacteria;p__Acidobacteria;c__unidentified_Acidobacteria;o__Acidobacteriales;f__Acidobacteriaceae_.Subgroup_1.;g__;s__	0.00580777	0.82025	0.863752	0.639424	0.665188	1.28664
OTU_691	k__Bacteria;p__Gemmatimonadetes;c__unidentified_Gemmatimonadetes;o__Gemmatimonadales;f__Gemmatimonadaceae	0.00725593	0.806403	0.0252825	0.0110318	0.0109702	0.0538454
OTU_438	k__Bacteria;p__Proteobacteria;c__Gammaproteobacteria;o__Xanthomonadales;f__unidentified_Xanthomonadales;g__Acidibacter	0.00753821	0.803925	0.0349168	0.00826927	0.0164577	0.0800235
OTU_286	k__Bacteria;p__Proteobacteria;c__Deltaproteobacteria;o__Myxococcales;f__Haliangiaceae;g__Haliangium;s__	0.00755697	0.803762	0.0326418	0.0137903	0.0137193	0.0704159
OTU_265	k__Bacteria;p__Saccharibacteria;c__;o__;f__;g__;s__	0.00755952	0.80374	0.0818458	0.00415007	0.00548629	0.235901
OTU_710	k__Bacteria;p__Proteobacteria;c__Alphaproteobacteria	0.00788614	0.800953	0.0110362	0	0	0.0331085
OTU_511	k__Bacteria;p__Gemmatimonadetes;c__unidentified_Gemmatimonadetes;o__Gemmatimonadales;f__Gemmatimonadaceae	0.00794637	0.800448	0.191991	0.0757504	0.108339	0.391885
OTU_1309	k__Bacteria;p__Chlamydiae;c__unidentified_Chlamydiae;o__Chlamydiales;f__Simkaniaceae;g__Candidatus_Rhabdochlamydia;s__	0.00799581	0.800035	0.00276003	0	0	0.0082801
OTU_321	k__Bacteria;p__Proteobacteria;c__Deltaproteobacteria;o__GR-WP33-30;f__;g__;s__	0.00821783	0.798201	0.0593196	0.00689893	0.00548511	0.165575
OTU_366	k__Bacteria;p__Saccharibacteria;c__;o__;f__;g__;s__	0.00864801	0.79474	0.0358842	0.0124379	0.00549104	0.0897238
OTU_1300	k__Bacteria;p__Actinobacteria;c__Thermoleophilia;o__Gaiellales;f__;g__;s__	0.00883826	0.793245	0.00413634	0.00137169	0	0.0110373
OTU_1060	k__Bacteria;p__Chloroflexi;c__Ktedonobacteria;o__Ktedonobacterales	0.00915939	0.790771	0.0146844	0.00689276	0.0164577	0.0207028
OTU_269	k__Bacteria;p__Proteobacteria;c__Deltaproteobacteria;o__Myxococcales;f__Haliangiaceae;g__Haliangium;s__	0.00936399	0.789224	0.114307	0.046785	0.0877819	0.208354
OTU_1873	k__Bacteria;p__Chloroflexi;c__Ktedonobacteria;o__Ktedonobacterales;f__Ktedonobacteraceae;g__;s__	0.0107041	0.779614	0.00275659	0	0.00137039	0.00689938
OTU_763	k__Bacteria;p__Chloroflexi;c__TK10;o__unidentified_TK10;f__unidentified_TK10;g__unidentified_TK10;s__bacterium_Ellin6519	0.0107881	0.77904	0.0224967	0.0165172	0.0137169	0.0372558
OTU_1185	k__Bacteria;p__Cyanobacteria;c__Melainabacteria;o__Vampirovibrionales;f__;g__;s__	0.0108034	0.778935	0.00275795	0	0.00137276	0.0069011
OTU_1341	k__Bacteria;p__Firmicutes;c__Clostridia;o__Clostridiales;f__Clostridiaceae_1;g__Clostridium_sensu_stricto_13	0.0108963	0.778303	0.00275943	0.00137718	0	0.0069011
OTU_523	k__Bacteria;p__Proteobacteria;c__Alphaproteobacteria;o__Rhodospirillales;f__I-10;g__;s__	0.0124626	0.768152	0.0197687	0.00138336	0.00274315	0.0551797
OTU_194	k__Bacteria;p__Saccharibacteria;c__;o__;f__;g__;s__	0.0136326	0.761113	0.114123	0	0.00137276	0.340996
OTU_278	k__Bacteria;p__Acidobacteria;c__unidentified_Acidobacteria;o__Subgroup_3;f__unidentified_Acidobacteria;g__Bryobacter;s__	0.01407	0.758585	0.101887	0.060602	0.0987604	0.146298
OTU_880	k__Bacteria;p__Bacteroidetes;c__Cytophagia;o__Cytophagales;f__Cytophagaceae;g__Sporocytophaga;s__	0.0142855	0.757359	0.00505785	0	0	0.0151735
OTU_829	k__Bacteria;p__Proteobacteria;c__Gammaproteobacteria;o__NKB5;f__;g__;s__	0.0145155	0.756063	0.00781525	0	0.00137157	0.0220742
OTU_1290	k__Bacteria;p__Proteobacteria;c__Deltaproteobacteria;o__Myxococcales;f__Vulgatibacteraceae;g__Vulgatibacter;s__	0.0151371	0.75263	0.00368265	0	0	0.0110479
OTU_392	k__Bacteria;p__Proteobacteria;c__Alphaproteobacteria;o__Rhizobiales;f__KF-JG30-B3;g__;s__	0.0151414	0.752606	0.0574291	0.00688177	0.0260623	0.139343
OTU_729	k__Bacteria;p__Acidobacteria;c__unidentified_Acidobacteria;o__Subgroup_4;f__11-24;g__;s__	0.0155528	0.750386	0.0119612	0.00413155	0	0.031752
OTU_147	k__Bacteria;p__Proteobacteria;c__Alphaproteobacteria;o__Rhodospirillales;f__JG37-AG-20;g__;s__	0.0157926	0.74911	0.235963	0.190052	0.164588	0.353249
OTU_71	k__Bacteria;p__Cyanobacteria;c__Melainabacteria;o__Obscuribacterales;f__;g__;s__	0.0161967	0.746987	0.0262136	0	0.00959272	0.069048
OTU_389	k__Bacteria;p__Proteobacteria;c__Alphaproteobacteria;o__Rhodospirillales;f__DA111;g__;s__	0.0173696	0.741022	0.0698113	0.0275195	0.0342964	0.147618
OTU_126	k__Bacteria;p__Proteobacteria;c__Alphaproteobacteria;o__Rhizobiales;f__unidentified_Rhizobiales;g__Rhizomicrobium;s__	0.0177235	0.739275	0.317536	0.103337	0.347024	0.502248
OTU_418	k__Bacteria;p__Proteobacteria;c__Gammaproteobacteria;o__Xanthomonadales;f__unidentified_Xanthomonadales;g__Acidibacter	0.0186802	0.734666	0.0500593	0.0165234	0.0274291	0.106225
OTU_310	k__Bacteria;p__Proteobacteria;c__Betaproteobacteria;o__TRA3-20;f__;g__;s__	0.019844	0.729266	0.0312538	0.00138336	0.0068555	0.0855226
OTU_166	k__Bacteria;p__Proteobacteria;c__Alphaproteobacteria;o__Rhizobiales;f__unidentified_Rhizobiales;g__Rhizomicrobium;s__	0.0206379	0.725702	0.360925	0.117027	0.222166	0.743583
OTU_590	k__Bacteria;p__Chloroflexi;c__KD4-96;o__;f__;g__;s__	0.0207528	0.725194	0.0215675	0.0123905	0.0205748	0.0317372
OTU_38	k__Bacteria;p__Proteobacteria;c__Alphaproteobacteria;o__Rhizobiales;f__Xanthobacteraceae;g__Pseudolabrys;s__	0.0215124	0.721882	1.25393	1.14575	0.97798	1.63806
OTU_1260	k__Bacteria;p__Acidobacteria;c__unidentified_Acidobacteria;o__Subgroup_6;f__;g__;s__	0.0219619	0.719958	0.00874683	0.00415007	0	0.0220904
OTU_695	k__Bacteria;p__Proteobacteria;c__Gammaproteobacteria	0.0224013	0.718102	0.0147217	0.00138336	0.00274196	0.0400398
OTU_207	k__Bacteria;p__Cyanobacteria;c__Melainabacteria;o__Obscuribacterales;f__;g__;s__	0.023075	0.715305	0.123214	0.00413772	0.00411354	0.361389
OTU_553	k__Bacteria;p__Gemmatimonadetes;c__unidentified_Gemmatimonadetes;o__Gemmatimonadales;f__Gemmatimonadaceae	0.024449	0.709762	0.0326352	0.00411506	0.00274196	0.0910486
OTU_961	k__Bacteria;p__WD272;c__;o__;f__;g__;s__	0.0251512	0.70701	0.00733687	0.00137169	0.00959864	0.0110403
OTU_883	k__Bacteria;p__Acidobacteria;c__unidentified_Acidobacteria;o__Acidobacteriales;f__Acidobacteriaceae_.Subgroup_1.;g__;s__	0.0253492	0.706243	0.228216	0.119772	0.159106	0.405771
OTU_319	k__Bacteria;p__Proteobacteria;c__Deltaproteobacteria;o__Myxococcales;f__Haliangiaceae;g__Haliangium;s__	0.0254089	0.706013	0.0712652	0.035819	0.0246895	0.153287
OTU_667	k__Bacteria;p__Gemmatimonadetes;c__unidentified_Gemmatimonadetes;o__Gemmatimonadales;f__Gemmatimonadaceae;g__Gemmatimonas;s__	0.0258213	0.704431	0.0325709	0.015151	0.0397792	0.0427826
OTU_1413	k__Bacteria;p__Proteobacteria;c__Deltaproteobacteria;o__Oligoflexales	0.0260698	0.703486	0.00414081	0	0.00137276	0.0110497
OTU_345	k__Bacteria;p__Proteobacteria;c__Alphaproteobacteria;o__Caulobacterales;f__Caulobacteraceae;g__;s__	0.0260848	0.703429	0.0376467	0.0192784	0.0260587	0.0676029
OTU_1171	k__Bacteria;p__Chloroflexi;c__TK10	0.0267314	0.700998	0.00321887	0	0	0.0096566
OTU_1615	k__Bacteria;p__Bacteroidetes;c__Sphingobacteriia;o__Sphingobacteriales;f__Chitinophagaceae	0.0279087	0.696672	0.0188252	0.00825345	0.0137145	0.0345075
OTU_826	k__Bacteria;p__Acidobacteria;c__unidentified_Acidobacteria;o__Subgroup_15;f__;g__;s__	0.0284022	0.694894	0.0110297	0	0.00411472	0.0289745
OTU_611	k__Bacteria;p__Acidobacteria;c__unidentified_Acidobacteria;o__Subgroup_2;f__;g__;s__	0.0285279	0.694445	0.0276169	0.00137718	0	0.0814734
OTU_904	k__Bacteria;p__Proteobacteria;c__Alphaproteobacteria;o__Rickettsiales;f__SM2D12;g__;s__	0.0290806	0.692484	0.00781648	0	0	0.0234494
OTU_931	k__Bacteria;p__Proteobacteria;c__Deltaproteobacteria;o__Myxococcales;f__Haliangiaceae;g__Haliangium;s__	0.0295018	0.691006	0.00505571	0	0.00274315	0.012424
OTU_681	k__Bacteria;p__Proteobacteria;c__Alphaproteobacteria;o__Rhodospirillales;f__JG37-AG-20;g__;s__	0.0300486	0.689109	0.009655	0	0.00411235	0.0248526
OTU_1354	k__Bacteria;p__Elusimicrobia;c__unidentified_Elusimicrobia;o__Lineage_IIa;f__;g__;s__	0.0312819	0.684913	0.0022987	0	0.00137276	0.00552335
OTU_1327	k__Bacteria;p__Proteobacteria;c__Alphaproteobacteria;o__Rhizobiales;f__unidentified_Rhizobiales;g__Rhizomicrobium;s__	0.0332966	0.678288	0.156591	0.0426589	0.0863973	0.340717
OTU_133	k__Bacteria;p__Proteobacteria;c__Alphaproteobacteria;o__Rhodospirillales;f__Acetobacteraceae	0.0335774	0.677387	0.348478	0.327817	0.209857	0.507759
OTU_981	k__Bacteria;p__Acidobacteria;c__unidentified_Acidobacteria;o__Subgroup_6;f__;g__;s__	0.0358827	0.670166	0.0188061	0.0110071	0.0219452	0.023466
OTU_1373	k__Bacteria;p__Chloroflexi;c__Ktedonobacteria;o__JG30-KF-AS9;f__;g__;s__	0.0363153	0.668846	0.00551003	0	0.00548511	0.011045
OTU_721	k__Bacteria;p__Proteobacteria;c__Alphaproteobacteria;o__Rickettsiales;f__Holosporaceae;g__;s__	0.0388951	0.661183	0.00505627	0.00138336	0.00137039	0.0124151
OTU_911	k__Bacteria;p__Chloroflexi;c__TK10;o__;f__;g__;s__	0.0396902	0.65889	0.00689699	0	0	0.020691
OTU_481	k__Bacteria;p__Chloroflexi;c__Ktedonobacteria;o__JG30-KF-AS9;f__unidentified_JG30-KF-AS9;g__unidentified_JG30-KF-AS9;s__Chloroflexi_bacterium_Ellin7237	0.0438882	0.647264	0.0381206	0.00824661	0.0329201	0.0731952
OTU_37	k__Bacteria;p__Proteobacteria;c__Alphaproteobacteria;o__Rhodospirillales;f__Rhodospirillaceae;g__Elstera;s__	0.0444559	0.64575	0.97262	0.746374	0.76659	1.4049
OTU_1368	k__Bacteria;p__Planctomycetes;c__Phycisphaerae;o__WD2101_soil_group;f__;g__;s__	0.0472888	0.63838	0.00551404	0	0.00411472	0.0124274
OTU_1852	k__Bacteria;p__Saccharibacteria;c__;o__;f__;g__;s__	0.0472929	0.638369	0.00643152	0.00137169	0.00137157	0.0165513
OTU_837	k__Bacteria;p__Gemmatimonadetes;c__unidentified_Gemmatimonadetes;o__Gemmatimonadales;f__Gemmatimonadaceae;g__Gemmatimonas;s__	0.0474254	0.638032	0.0151558	0.0082576	0.00960575	0.0276039
OTU_169	k__Bacteria;p__Proteobacteria;c__Betaproteobacteria;o__Nitrosomonadales;f__Nitrosomonadaceae;g__;s__	0.0477912	0.637104	0.191424	0.0619538	0.144013	0.368305
OTU_893	k__Bacteria;p__Chloroflexi;c__Ktedonobacteria;o__JG30-KF-AS9;f__unidentified_JG30-KF-AS9;g__unidentified_JG30-KF-AS9;s__Chloroflexi_bacterium_Ellin7237	0.0481177	0.636279	0.00460485	0	0	0.0138145
OTU_302	k__Bacteria;p__Proteobacteria;c__Alphaproteobacteria;o__Rhodospirillales;f__DA111;g__;s__	0.0486157	0.635029	0.147377	0.121115	0.0740602	0.246956
OTU_1034	k__Bacteria;p__WCHB1-60;c__;o__;f__;g__;s__	0.0489938	0.634085	0.00505274	0	0.00274315	0.0124151
OTU_803	k__Bacteria;p__Firmicutes;c__Clostridia;o__Clostridiales;f__Ruminococcaceae;g__Ruminiclostridium_1	0.0501403	0.631253	0.0234111	0.0386077	0.0178269	0.0137988
OTU_817	k__Bacteria;p__Proteobacteria;c__Alphaproteobacteria	0.051573	0.627773	0.0087256	0.0110195	0.00411235	0.011045
OTU_204	k__Bacteria;p__Proteobacteria;c__Alphaproteobacteria;o__Rhizobiales;f__Hyphomicrobiaceae;g__Devosia;s__	0.0520773	0.626564	0.0606398	0.050933	0.030177	0.100809
OTU_733	k__Bacteria;p__Gemmatimonadetes;c__unidentified_Gemmatimonadetes;o__Gemmatimonadales;f__Gemmatimonadaceae	0.0529437	0.624505	0.0096459	0.00688042	0.00411591	0.0179414
OTU_455	k__Bacteria;p__Chloroflexi;c__Ktedonobacteria;o__JG30-KF-AS9	0.0530269	0.624308	0.0358014	0.0123857	0.0356656	0.059353
OTU_1042	k__Bacteria;p__Chloroflexi;c__Ktedonobacteria;o__JG30-KF-AS9	0.0532371	0.623812	0.00689416	0.00137718	0.00411472	0.0151906
OTU_1075	k__Bacteria;p__Proteobacteria;c__Deltaproteobacteria;o__Oligoflexales	0.0533052	0.623652	0.006437	0	0.00274315	0.0165679
OTU_240	k__Bacteria;p__Bacteroidetes;c__Sphingobacteriia;o__Sphingobacteriales;f__Sphingobacteriaceae;g__Mucilaginibacter;s__	0.0535129	0.623164	0.140725	0.0618639	0.198876	0.161434
OTU_660	k__Bacteria;p__Gemmatimonadetes;c__unidentified_Gemmatimonadetes;o__Gemmatimonadales;f__Gemmatimonadaceae;g__;s__	0.0536801	0.622772	0.0101221	0	0.00137157	0.0289948
OTU_990	k__Bacteria;p__Proteobacteria;c__Gammaproteobacteria;o__Legionellales;f__Coxiellaceae	0.0543004	0.621324	0.00365713	0	0.0109714	0
OTU_993	k__Bacteria;p__Proteobacteria;c__Deltaproteobacteria;o__Myxococcales;f__P3OB-42;g__;s__	0.0543813	0.621136	0.00368051	0	0	0.0110415
OTU_559	k__Bacteria;p__Actinobacteria;c__unidentified_Actinobacteria;o__Micromonosporales;f__Micromonosporaceae;g__Micromonospora;s__	0.0546408	0.620534	0.087165	0.128037	0.067213	0.0662449
OTU_174	k__Bacteria;p__Actinobacteria;c__unidentified_Actinobacteria;o__Streptosporangiales;f__Thermomonosporaceae;g__Actinoallomurus	0.0547169	0.620358	0.162328	0.298801	0.141246	0.0469387
OTU_434	k__Bacteria;p__Proteobacteria;c__Deltaproteobacteria;o__Bdellovibrionales;f__Bdellovibrionaceae;g__Bdellovibrio;s__	0.0554935	0.618571	0.0404262	0.0592873	0.0164565	0.0455347
OTU_1641	k__Bacteria;p__Firmicutes;c__Bacilli;o__Bacillales;f__Paenibacillaceae;g__Paenibacillus	0.0569668	0.615225	0.00504848	0.0110078	0.00137276	0.00276488
OTU_225	k__Bacteria;p__Actinobacteria;c__unidentified_Actinobacteria;o__Corynebacteriales;f__Mycobacteriaceae;g__Mycobacterium;s__Mycobacterium_gordonae	0.0569985	0.615153	0.00458175	0.00825278	0.00411472	0.00137775
OTU_504	k__Bacteria;p__Proteobacteria;c__Alphaproteobacteria;o__Rhodospirillales;f__Acetobacteraceae	0.0574112	0.614227	0.05323	0.0715955	0.0384076	0.049687
OTU_945	k__Bacteria;p__Gemmatimonadetes;c__unidentified_Gemmatimonadetes;o__Gemmatimonadales;f__Gemmatimonadaceae;g__Gemmatimonas;s__	0.057536	0.613947	0.0137894	0.00551008	0.00411235	0.0317458
OTU_1346	k__Bacteria	0.0583712	0.612088	0.00460077	0.00275437	0	0.0110479
OTU_756	k__Bacteria;p__Acidobacteria;c__unidentified_Acidobacteria;o__Subgroup_3;f__unidentified_Acidobacteria;g__Bryobacter;s__	0.0598355	0.608871	0.00688703	0	0.0054863	0.0151748
OTU_764	k__Bacteria;p__Chloroflexi;c__TK10;o__;f__;g__;s__	0.0600012	0.608511	0.00827958	0.0096588	0	0.0151799
OTU_24	k__Bacteria;p__Proteobacteria;c__Betaproteobacteria;o__Burkholderiales;f__Comamonadaceae;g__Ramlibacter;s__	0.0609738	0.606407	1.1311	0.85729	1.5896	0.946406
OTU_170	k__Bacteria;p__Gemmatimonadetes;c__unidentified_Gemmatimonadetes;o__Gemmatimonadales;f__Gemmatimonadaceae;g__Gemmatimonas	0.0611279	0.606075	0.249014	0.139061	0.312695	0.295285
OTU_588	k__Bacteria;p__Proteobacteria;c__Alphaproteobacteria;o__Rhodospirillales;f__KCM-B-15;g__;s__	0.061259	0.605794	0.0229695	0.0123843	0.00823062	0.0482935
OTU_542	k__Bacteria;p__Acidobacteria;c__unidentified_Acidobacteria;o__Subgroup_6;f__;g__;s__	0.0614178	0.605454	0.0210843	0.00688109	0.031545	0.0248267
OTU_79	k__Bacteria;p__Proteobacteria;c__Alphaproteobacteria;o__Rhizobiales;f__Methylobacteriaceae;g__Microvirga;s__	0.0622164	0.603751	0.560221	0.76298	0.433364	0.484318
OTU_609	k__Bacteria;p__Acidobacteria;c__unidentified_Acidobacteria;o__Acidobacteriales;f__Acidobacteriaceae_.Subgroup_1.	0.0624192	0.603321	0.104988	0.0826521	0.149492	0.0828187
OTU_115	k__Bacteria;p__Bacteroidetes;c__Sphingobacteriia;o__Sphingobacteriales;f__Chitinophagaceae;g__Flavisolibacter	0.063063	0.601962	0.00412495	0.00825895	0.00411591	0
OTU_192	k__Bacteria;p__Chloroflexi;c__Ktedonobacteria;o__JG30-KF-AS9;f__;g__;s__	0.0643185	0.599338	0.175196	0.0455258	0.0891357	0.390925
OTU_259	k__Bacteria	0.0647994	0.598342	0.00412462	0	0.00822826	0.00414559
OTU_185	k__Bacteria;p__Acidobacteria;c__unidentified_Acidobacteria;o__Subgroup_3;f__unidentified_Acidobacteria;g__Bryobacter;s__	0.0658456	0.596191	0.153669	0.1942	0.149502	0.117304
OTU_1007	k__Bacteria;p__Acidobacteria;c__unidentified_Acidobacteria;o__Subgroup_5;f__;g__;s__	0.0661043	0.595663	0.0123744	0.00414389	0.0233215	0.00965785
OTU_1037	k__Bacteria;p__Firmicutes;c__Bacilli;o__Bacillales;f__Paenibacillaceae;g__Paenibacillus	0.0661617	0.595546	0.0156033	0.0234162	0.00960101	0.0137928
OTU_754	k__Bacteria;p__Gemmatimonadetes;c__unidentified_Gemmatimonadetes;o__AT425-EubC11_terrestrial_group;f__;g__;s__	0.0674764	0.592885	0.00961808	0	0.0205665	0.00828775
OTU_1183	k__Bacteria;p__Firmicutes;c__Bacilli;o__Bacillales;f__Bacillaceae;g__Bacillus	0.0678902	0.592054	0.00551695	0.0110305	0	0.00552038
OTU_190	k__Bacteria;p__Bacteroidetes;c__Sphingobacteriia;o__Sphingobacteriales;f__Chitinophagaceae;g__Chitinophaga;s__Chitinophaga_jiangningensis	0.0682959	0.591243	0.0174201	0.0357613	0.0109726	0.00552631
OTU_1180	k__Bacteria;p__Acidobacteria;c__unidentified_Acidobacteria;o__Subgroup_3;f__unidentified_Acidobacteria;g__Candidatus_Solibacter;s__	0.0699218	0.588025	0.89698	0.730378	1.44856	0.511999
OTU_643	k__Bacteria;p__Proteobacteria;c__Alphaproteobacteria;o__Rhizobiales;f__MNG7;g__;s__	0.0711659	0.585596	0.00412023	0.0068756	0.00548511	0
OTU_90	k__Bacteria;p__Firmicutes;c__Bacilli;o__Bacillales;f__Bacillaceae;g__Bacillus;s__Bacillus_aryabhattai	0.0713355	0.585267	0.285903	0.444337	0.309894	0.103479
OTU_524	k__Bacteria;p__Saccharibacteria;c__;o__;f__;g__;s__	0.0713826	0.585176	0.0317587	0	0.00548985	0.0897863
OTU_1329	k__Bacteria;p__Chloroflexi;c__TK10;o__;f__;g__;s__	0.0713926	0.585156	0.0027556	0	0.00137039	0.00689641
OTU_1076	k__Bacteria;p__Chloroflexi;c__Ktedonobacteria;o__Ktedonobacterales;f__Ktedonobacteraceae;g__Ktedonobacter	0.0715584	0.584836	0.0288623	0.0179184	0.0548701	0.0137983
OTU_45	k__Bacteria;p__Chloroflexi;c__Ktedonobacteria;o__Ktedonobacterales;f__Thermosporotrichaceae;g__;s__	0.0724428	0.583132	0.95985	0.595882	1.7422	0.541465
OTU_1068	k__Bacteria;p__Firmicutes;c__OPB54	0.0727153	0.58261	0.00551503	0.00827062	0.00137039	0.00690407
OTU_1831	k__Bacteria;p__Proteobacteria;c__Alphaproteobacteria;o__Rhodospirillales;f__Acetobacteraceae	0.0742621	0.579671	0.0119258	0.0192888	0.0123477	0.00414091
OTU_804	k__Bacteria;p__Firmicutes;c__Clostridia;o__Clostridiales;f__Ruminococcaceae;g__Ruminiclostridium_1;s__	0.0742792	0.579639	0.0211082	0.0330633	0.0150909	0.0151706
OTU_1172	k__Bacteria;p__Chloroflexi	0.0756434	0.577081	0.00413491	0	0.00137039	0.0110344
OTU_1513	k__Bacteria;p__Firmicutes;c__Clostridia;o__Clostridiales;f__Ruminococcaceae;g__Ruminiclostridium_1;s__	0.0763367	0.575793	0.00734572	0.0137739	0.00137157	0.00689173
OTU_1399	k__Bacteria;p__Acidobacteria;c__unidentified_Acidobacteria;o__Acidobacteriales;f__Acidobacteriaceae_.Subgroup_1.;g__Candidatus_Koribacter;s__	0.0773096	0.573999	0.0160916	0.00690511	0.00822588	0.0331438
OTU_1704	k__Bacteria;p__Acidobacteria;c__unidentified_Acidobacteria;o__Acidobacteriales;f__Acidobacteriaceae_.Subgroup_1.;g__;s__	0.077816	0.57307	0.00367556	0	0.00274315	0.00828354
OTU_103	k__Bacteria;p__Proteobacteria;c__Alphaproteobacteria;o__Sphingomonadales;f__Sphingomonadaceae;g__Blastomonas;s__Blastomonas_natatoria	0.0778535	0.573002	0.0307612	0.0537889	0.0246859	0.0138086
OTU_1326	k__Bacteria;p__Thermomicrobia;c__unidentified_Thermomicrobia;o__Sphaerobacterales;f__Sphaerobacteraceae	0.0783914	0.572021	0.00413602	0.00137169	0.00137039	0.00966597
OTU_1559	k__Bacteria;p__Firmicutes;c__Bacilli;o__Bacillales;f__Paenibacillaceae;g__Paenibacillus	0.0785327	0.571764	0.00367126	0.00827062	0.00274315	0
OTU_1651	k__Bacteria;p__Proteobacteria;c__Deltaproteobacteria;o__Oligoflexales;f__;g__;s__	0.0791348	0.570672	0.00276274	0	0	0.00828822
OTU_1846	k__Bacteria;p__Gemmatimonadetes;c__unidentified_Gemmatimonadetes;o__Gemmatimonadales;f__Gemmatimonadaceae;g__Gemmatimonas;s__	0.0791348	0.570672	0.00276274	0	0	0.00828822
OTU_894	k__Bacteria;p__Proteobacteria;c__Alphaproteobacteria;o__Rhizobiales;f__Phyllobacteriaceae	0.0795743	0.569879	0.0307786	0.0634217	0.0123442	0.01657
OTU_320	k__Bacteria;p__Chloroflexi;c__Chloroflexia;o__Kallotenuales;f__AKIW781;g__;s__	0.079901	0.569291	0.0036785	0.00827062	0	0.00276488
OTU_99	k__Bacteria;p__Proteobacteria;c__Gammaproteobacteria;o__Xanthomonadales;f__Xanthomonadaceae;g__Rhodanobacter;s__Frateuria_terrea	0.0799494	0.569204	0.306967	0.253397	0.304481	0.363023
OTU_749	k__Bacteria;p__Proteobacteria;c__Deltaproteobacteria;o__Oligoflexales;f__unidentified_Oligoflexales;g__unidentified_Oligoflexales;s__Geobacter_sp._enrichment_culture_clone_VanCtr1	0.0804678	0.568275	0.0133091	0.0247748	0.00274196	0.0124104
OTU_1856	k__Bacteria;p__Actinobacteria;c__unidentified_Actinobacteria;o__Frankiales;f__Acidothermaceae;g__Acidothermus;s__	0.0806176	0.568007	0.0265939	0.039967	0.0301675	0.00964723
OTU_223	k__Bacteria;p__Acidobacteria;c__unidentified_Acidobacteria;o__Acidobacteriales;f__Acidobacteriaceae_.Subgroup_1.;g__;s__	0.0812353	0.566907	0.163249	0.128106	0.208448	0.153194
OTU_120	k__Bacteria;p__Proteobacteria;c__Gammaproteobacteria;o__Xanthomonadales;f__Xanthomonadaceae;g__Pseudoxanthomonas;s__Pseudoxanthomonas_mexicana	0.0814675	0.566494	0.0312404	0.0620747	0.0164589	0.0151876
OTU_352	k__Bacteria;p__Gemmatimonadetes;c__unidentified_Gemmatimonadetes;o__Gemmatimonadales;f__Gemmatimonadaceae;g__unidentified_Gemmatimonadetes;s__Gemmatimonadetes_bacterium_WY71	0.0834062	0.563082	0.0899041	0.0647803	0.113835	0.0910973
OTU_734	k__Bacteria;p__Proteobacteria;c__Alphaproteobacteria;o__Rhizobiales;f__unidentified_Rhizobiales;g__Bauldia;s__	0.0837256	0.562525	0.0142318	0.0137629	0.00685787	0.0220746
OTU_1178	k__Bacteria;p__Armatimonadetes;c__;o__;f__;g__;s__	0.0837662	0.562455	0.00414231	0	0	0.0124269
OTU_684	k__Bacteria;p__Firmicutes	0.083863	0.562286	0.0325782	0.0440588	0.0219404	0.0317355
OTU_78	k__Bacteria;p__Proteobacteria;c__Alphaproteobacteria;o__Rhizobiales;f__Bradyrhizobiaceae;g__Bosea;s__Bosea_thiooxidans	0.0838828	0.562252	0.0427019	0.0854531	0.024686	0.0179665
OTU_414	k__Bacteria;p__Proteobacteria;c__Deltaproteobacteria;o__Bdellovibrionales;f__Bdellovibrionaceae;g__Bdellovibrio;s__	0.0843272	0.56148	0.00321482	0.00274337	0	0.0069011
OTU_27	k__Bacteria;p__Chloroflexi;c__Ktedonobacteria;o__C0119;f__;g__;s__	0.0856311	0.559232	0.0284184	0.0481402	0.0246907	0.0124244
OTU_496	k__Bacteria;p__Chloroflexi;c__Ktedonobacteria;o__JG30-KF-AS9;f__;g__;s__	0.0857294	0.559063	0.0308117	0.0179418	0.0137181	0.0607751
OTU_889	k__Bacteria;p__Firmicutes;c__Bacilli;o__Bacillales;f__Paenibacillaceae;g__Paenibacillus	0.0877508	0.555624	0.011002	0.0178937	0.0109714	0.00414091
OTU_613	k__Bacteria;p__Chloroflexi;c__Ktedonobacteria;o__Ktedonobacterales	0.087756	0.555615	0.014258	0.0220671	0	0.0207067
OTU_1281	k__Bacteria;p__Firmicutes;c__Bacilli;o__Bacillales;f__Planococcaceae;g__Solibacillus;s__	0.0887979	0.553864	0.00779368	0.0123967	0.00822588	0.00275847
OTU_70	k__Bacteria;p__Proteobacteria;c__Betaproteobacteria;o__Burkholderiales;f__Comamonadaceae;g__Ideonella;s__	0.0894059	0.552848	0.052405	0.125591	0.0205712	0.0110526
OTU_184	k__Bacteria;p__Chloroflexi;c__KD4-96;o__;f__;g__;s__	0.0906182	0.550836	0.0110221	0.0220513	0.00548867	0.00552631
OTU_1267	k__Bacteria;p__Proteobacteria;c__Alphaproteobacteria;o__Rhizobiales;f__Beijerinckiaceae;g__Methylorosula;s__	0.0911088	0.550027	0.0449448	0.0633523	0.0452619	0.0262202
OTU_241	k__Bacteria;p__Gemmatimonadetes;c__unidentified_Gemmatimonadetes;o__Gemmatimonadales;f__Gemmatimonadaceae;g__Gemmatimonas;s__	0.091279	0.549747	0.129357	0.165229	0.115218	0.107624
OTU_1663	k__Bacteria;p__Proteobacteria;c__Deltaproteobacteria;o__Oligoflexales;f__;g__;s__	0.0918738	0.548771	0.0105863	0.00690443	0.00137157	0.023483
OTU_191	k__Bacteria;p__Firmicutes;c__Bacilli;o__Bacillales;f__Sporolactobacillaceae	0.0926138	0.547563	0.300898	0.462339	0.183774	0.25658
OTU_1672	k__Bacteria;p__Firmicutes;c__Bacilli;o__Bacillales;f__Paenibacillaceae;g__Paenibacillus	0.0927499	0.547341	0.012859	0.0192901	0.00548511	0.0138017
OTU_109	k__Bacteria;p__Proteobacteria;c__Betaproteobacteria;o__Burkholderiales;f__Comamonadaceae;g__Hydrogenophaga	0.0934997	0.546125	0.0215931	0.0496602	0.00959864	0.00552038
OTU_1797	k__Bacteria;p__Acidobacteria;c__unidentified_Acidobacteria;o__Subgroup_3;f__unidentified_Acidobacteria;g__Bryobacter;s__	0.0938146	0.545616	0.0247773	0.0358478	0.0274279	0.0110561
OTU_1001	k__Bacteria;p__Chloroflexi;c__Ktedonobacteria;o__Ktedonobacterales;f__Thermosporotrichaceae;g__Thermosporothrix;s__	0.0947816	0.54406	0.0316463	0.0234388	0.0466347	0.0248654
OTU_1131	k__Bacteria;p__Gemmatimonadetes;c__unidentified_Gemmatimonadetes;o__Gemmatimonadales;f__Gemmatimonadaceae;g__Gemmatimonas;s__	0.0950298	0.543662	0.00597045	0	0.00274078	0.0151706
OTU_4	k__Bacteria;p__Proteobacteria;c__Alphaproteobacteria;o__Sphingomonadales;f__Sphingomonadaceae;g__Sphingomonas;s__	0.0950772	0.543586	0.500703	0.620972	0.378545	0.502592
OTU_1127	k__Bacteria;p__Chloroflexi;c__JG30-KF-CM66;o__;f__;g__;s__	0.0952674	0.543282	0.00551123	0.00137169	0.00411235	0.0110497
OTU_1522	k__Bacteria;p__Firmicutes;c__Bacilli;o__Bacillales;f__Bacillaceae;g__Bacillus;s__Bacillus_funiculus	0.095494	0.54292	0.0393989	0.0536475	0.050747	0.0138022
OTU_155	k__Bacteria;p__Proteobacteria;c__Alphaproteobacteria;o__Rhizobiales;f__Methylobacteriaceae;g__;s__	0.0959736	0.542156	0.0151608	0.0262062	0.00822826	0.0110479
OTU_101	k__Bacteria;p__Actinobacteria;c__Acidimicrobiia;o__Acidimicrobiales;f__Acidimicrobiaceae;g__Illumatobacter;s__	0.0962545	0.54171	0.032621	0.0676225	0.0219523	0.00828822
OTU_1442	k__Bacteria;p__Proteobacteria;c__Gammaproteobacteria	0.0992437	0.537014	0.00827994	0	0	0.0248398
OTU_1711	k__Bacteria;p__Firmicutes;c__Bacilli;o__Bacillales;f__Alicyclobacillaceae;g__Tumebacillus	0.0995062	0.536606	0.00596948	0.0137732	0.00137039	0.00276488
OTU_537	k__Bacteria;p__Actinobacteria;c__unidentified_Actinobacteria;o__Pseudonocardiales;f__Pseudonocardiaceae;g__Pseudonocardia;s__Pseudonocardia_sulfidoxydans	0.099572	0.536504	0.023846	0.0372003	0.0260563	0.00828135
OTU_464	k__Bacteria;p__Chloroflexi;c__Ktedonobacteria;o__JG30-KF-AS9	0.100569	0.534963	0.0551707	0.0220788	0.0329249	0.110508
OTU_260	k__Bacteria;p__Proteobacteria;c__Alphaproteobacteria;o__Rhizobiales;f__Hyphomicrobiaceae;g__Devosia;s__Devosia_riboflavina	0.100988	0.534318	0.00644262	0.0151805	0	0.00414731
OTU_792	k__Bacteria;p__Proteobacteria;c__Gammaproteobacteria;o__Xanthomonadales;f__Xanthomonadaceae;g__Rhodanobacter;s__	0.101229	0.533948	0.0142248	0.00415007	0.0192008	0.0193234
OTU_982	k__Bacteria;p__Firmicutes;c__Clostridia;o__Clostridiales;f__Clostridiaceae_1;g__Clostridium_sensu_stricto_8;s__	0.102368	0.532205	0.0206698	0.0372545	0.0137145	0.0110403
OTU_485	k__Bacteria;p__Proteobacteria;c__Alphaproteobacteria;o__Rhodospirillales;f__Rhodospirillaceae;g__Dongia	0.102439	0.532099	0.0293878	0.0165529	0.0274327	0.0441777
OTU_384	k__Bacteria;p__Actinobacteria;c__unidentified_Actinobacteria;o__Micromonosporales;f__Micromonosporaceae;g__Dactylosporangium;s__	0.102609	0.531839	0.0495473	0.0661499	0.053502	0.0289898
OTU_281	k__Bacteria;p__Actinobacteria;c__unidentified_Actinobacteria;o__PeM15;f__;g__;s__	0.103078	0.531127	0.00552206	0.0110428	0	0.00552335
OTU_36	k__Bacteria;p__Proteobacteria;c__Alphaproteobacteria;o__Caulobacterales;f__Caulobacteraceae;g__Asticcacaulis;s__	0.104228	0.52939	0.035824	0.086864	0.0164624	0.00414559
OTU_507	k__Bacteria;p__Actinobacteria;c__Thermoleophilia;o__Gaiellales	0.104755	0.528597	0.0729042	0.0798538	0.0850269	0.0538318
OTU_145	k__Bacteria;p__Acidobacteria;c__unidentified_Acidobacteria;o__Subgroup_4;f__unidentified_Acidobacteria;g__Blastocatella	0.106254	0.52636	0.0311707	0.0275484	0.0480015	0.0179623
OTU_978	k__Bacteria;p__Planctomycetes;c__Phycisphaerae;o__CPla-3_termite_group;f__;g__;s__	0.106549	0.525922	0.00641343	0.00137718	0.0137205	0.00414263
OTU_22	k__Bacteria;p__Chloroflexi;c__Ktedonobacteria;o__Ktedonobacterales	0.106603	0.525841	5.03764	3.29703	7.68978	4.12612
OTU_1151	k__Bacteria;p__Proteobacteria;c__Deltaproteobacteria;o__Myxococcales;f__P3OB-42;g__;s__	0.107203	0.524955	0.00597067	0.00963613	0	0.00827588
OTU_248	k__Bacteria;p__Chloroflexi;c__Ktedonobacteria;o__Ktedonobacterales;f__FCPS473;g__;s__	0.107896	0.523933	0.210543	0.155965	0.323704	0.151958
OTU_180	k__Bacteria;p__Chloroflexi;c__Ktedonobacteria;o__JG30-KF-AS9;f__;g__;s__	0.108148	0.523562	0.232602	0.0868783	0.145384	0.465542
OTU_218	k__Bacteria;p__Proteobacteria;c__Alphaproteobacteria;o__Rhodospirillales;f__Rhodospirillaceae;g__Ferrovibrio	0.108469	0.523091	0.0124225	0.0331203	0	0.00414731
OTU_1727	k__Bacteria;p__Proteobacteria;c__Alphaproteobacteria;o__Caulobacterales;f__Caulobacteraceae;g__;s__	0.10901	0.5223	0.0123999	0.00138336	0.008233	0.0275835
OTU_322	k__Bacteria;p__Actinobacteria;c__unidentified_Actinobacteria;o__Frankiales;f__Acidothermaceae;g__Acidothermus;s__	0.109675	0.521331	0.0687894	0.0881574	0.074065	0.0441459
OTU_17	k__Bacteria;p__Saccharibacteria;c__;o__;f__;g__;s__	0.110574	0.520027	0.0252656	0.0579294	0.0137217	0.00414559
OTU_92	k__Bacteria;p__Proteobacteria;c__Deltaproteobacteria;o__Bdellovibrionales;f__Bdellovibrionaceae;g__Bdellovibrio;s__	0.110801	0.519698	0.0156403	0.0386502	0.00274078	0.00552975
OTU_849	k__Bacteria;p__Proteobacteria;c__Alphaproteobacteria;o__Rhodospirillales;f__DA111;g__;s__	0.112073	0.517867	0.00597542	0	0.00274552	0.0151807
OTU_942	k__Bacteria;p__Firmicutes;c__Bacilli;o__Bacillales;f__Paenibacillaceae;g__Paenibacillus	0.112698	0.516972	0.0311834	0.0481683	0.0233132	0.0220687
OTU_332	k__Bacteria;p__Bacteroidetes;c__Sphingobacteriia;o__Sphingobacteriales;f__Chitinophagaceae;g__;s__	0.112743	0.516908	0.038598	0.00414389	0.00685313	0.104797
OTU_1233	k__Bacteria;p__Proteobacteria;c__Deltaproteobacteria;o__Myxococcales;f__Polyangiaceae;g__Sorangium;s__	0.115442	0.513084	0.00872528	0.011025	0.00411354	0.0110373
OTU_1252	k__Bacteria;p__Chloroflexi;c__Ktedonobacteria;o__C0119;f__;g__;s__	0.115497	0.513006	0.00732602	0.00274337	0.015092	0.00414263
OTU_264	k__Bacteria;p__Proteobacteria;c__Alphaproteobacteria;o__Rhodospirillales;f__Rhodospirillaceae;g__;s__	0.115802	0.512578	0.152634	0.107403	0.222159	0.12834
OTU_1181	k__Bacteria;p__Firmicutes;c__Bacilli;o__Bacillales;f__Paenibacillaceae;g__Cohnella;s__	0.116215	0.511999	0.0243267	0.038585	0.0164601	0.017935
OTU_589	k__Bacteria;p__Acidobacteria;c__unidentified_Acidobacteria;o__Subgroup_2;f__;g__;s__	0.116904	0.511037	0.0137782	0	0.00822352	0.0331112
OTU_490	k__Bacteria;p__Proteobacteria;c__Gammaproteobacteria;o__Xanthomonadales;f__unidentified_Xanthomonadales;g__Acidibacter;s__	0.117462	0.51026	0.0449735	0.0316326	0.0315462	0.0717417
OTU_1212	k__Bacteria;p__Proteobacteria;c__Deltaproteobacteria;o__Myxococcales;f__Polyangiaceae	0.11762	0.51004	0.0169845	0.0206604	0.0109738	0.0193191
OTU_75	k__Bacteria;p__Armatimonadetes;c__;o__;f__;g__;s__	0.118743	0.508486	0.0330825	0.077223	0.0109702	0.0110543
OTU_337	k__Bacteria;p__Proteobacteria;c__Gammaproteobacteria;o__Legionellales;f__Coxiellaceae	0.118747	0.50848	0.0448412	0.0055149	0.127626	0.00138244
OTU_349	k__Bacteria;p__Proteobacteria;c__Alphaproteobacteria;o__Rhodospirillales;f__Acetobacteraceae;g__Roseomonas;s__	0.119357	0.50764	0.00504217	0.00689826	0.00822826	0
OTU_135	k__Bacteria;p__Proteobacteria;c__Alphaproteobacteria;o__Rhodospirillales;f__Acetobacteraceae	0.119756	0.507092	0.286676	0.371875	0.268805	0.219348
OTU_718	k__Bacteria;p__Gemmatimonadetes;c__unidentified_Gemmatimonadetes;o__Gemmatimonadales;f__Gemmatimonadaceae;g__Gemmatimonas;s__	0.120007	0.506748	0.0119146	0.0151689	0.0191973	0.00137775
OTU_1681	k__Bacteria;p__Firmicutes;c__Bacilli;o__Bacillales;f__Paenibacillaceae;g__Aneurinibacillus;s__	0.120099	0.506622	0.00367719	0.0096588	0.00137276	0
OTU_699	k__Bacteria	0.120217	0.50646	0.0128336	0.00550873	0.021944	0.0110479
OTU_612	k__Bacteria;p__Firmicutes;c__Bacilli;o__Bacillales;f__Alicyclobacillaceae;g__Alicyclobacillus	0.120847	0.505599	0.0404152	0.0647926	0.0164553	0.0399978
OTU_477	k__Bacteria;p__Nitrospirae;c__Nitrospira;o__Nitrospirales;f__Nitrospiraceae	0.120989	0.505406	0.0266877	0.00415007	0.0068555	0.0690575
OTU_137	k__Bacteria;p__Actinobacteria;c__unidentified_Actinobacteria;o__Corynebacteriales;f__Mycobacteriaceae;g__Mycobacterium	0.121608	0.504564	0.124348	0.174974	0.116575	0.0814934
OTU_98	k__Bacteria;p__Proteobacteria;c__Betaproteobacteria;o__Burkholderiales;f__Burkholderiaceae;g__Burkholderia;s__Burkholderia_cepacia	0.121915	0.504148	0.122867	0.106059	0.172841	0.089701
OTU_636	k__Bacteria;p__Firmicutes;c__Bacilli;o__Bacillales;f__Paenibacillaceae;g__Paenibacillus;s__Paenibacillus_alginolyticus	0.121977	0.504064	0.0334734	0.0522724	0.0246907	0.0234571
OTU_1383	k__Bacteria;p__Acidobacteria;c__unidentified_Acidobacteria;o__Acidobacteriales;f__Acidobacteriaceae_.Subgroup_1.;g__Acidobacterium;s__	0.122383	0.503515	0.00781122	0.00137718	0.00548392	0.0165725
OTU_1111	k__Bacteria;p__Firmicutes;c__Clostridia;o__Clostridiales;f__Ruminococcaceae;g__Pseudobacteroides;s__	0.1226	0.503221	0.00459761	0.0110373	0	0.0027555
OTU_828	k__Bacteria;p__Firmicutes;c__Clostridia;o__Clostridiales;f__Lachnospiraceae;g__Lachnoclostridium;s__Clostridium_sp._KNHs205	0.123358	0.5022	0.0197527	0.0303371	0.00822588	0.0206952
OTU_719	k__Bacteria;p__Chloroflexi;c__TK10	0.123559	0.501929	0.00873094	0.00275437	0.00274078	0.0206977
OTU_3	k__Bacteria;p__Proteobacteria;c__Alphaproteobacteria;o__Sphingomonadales;f__Sphingomonadaceae;g__Novosphingobium;s__	0.124122	0.501173	0.125539	0.170691	0.186593	0.0193332
OTU_316	k__Bacteria;p__Chloroflexi;c__Ktedonobacteria;o__Ktedonobacterales;f__Thermosporotrichaceae;g__;s__	0.124192	0.50108	0.0953161	0.0372017	0.192096	0.0566504
OTU_538	k__Bacteria;p__Firmicutes;c__Bacilli;o__Bacillales;f__Bacillaceae;g__Bacillus	0.124297	0.500939	0.147215	0.209255	0.137169	0.0952198
OTU_200	k__Bacteria;p__Proteobacteria;c__Betaproteobacteria;o__Burkholderiales;f__Comamonadaceae	0.124409	0.500789	0.0802538	0.0564733	0.102875	0.0814131
OTU_594	k__Bacteria;p__Actinobacteria;c__Thermoleophilia;o__Solirubrobacterales	0.12568	0.499096	0.0128528	0.00824661	0.00548511	0.0248267
OTU_1116	k__Bacteria;p__Chloroflexi;c__Ktedonobacteria;o__JG30-KF-AS9;f__;g__;s__	0.126057	0.498595	0.142934	0.0510586	0.10699	0.270755
OTU_326	k__Bacteria;p__Chloroflexi;c__Ktedonobacteria;o__Ktedonobacterales;f__1959-1;g__;s__	0.126314	0.498255	0.275885	0.180443	0.480091	0.167121
OTU_244	k__Bacteria;p__Bacteroidetes;c__Sphingobacteriia;o__Sphingobacteriales;f__Chitinophagaceae;g__Niastella;s__	0.127534	0.496644	0.0890929	0.0384992	0.0521222	0.176657
OTU_1390	k__Bacteria;p__Proteobacteria;c__Deltaproteobacteria;o__Myxococcales;f__Myxococcaceae;g__Myxococcus	0.127882	0.496187	0.00275012	0.00138336	0.00548629	0.00138072
OTU_645	k__Bacteria	0.129753	0.493741	0.0238728	0.0234162	0.0150849	0.0331174
OTU_1622	k__Bacteria;p__Chloroflexi;c__Ktedonobacteria;o__Ktedonobacterales	0.130109	0.493279	0.0105271	0.00412673	0.023312	0.00414263
OTU_573	k__Bacteria;p__Proteobacteria;c__Alphaproteobacteria;o__Rhodospirillales	0.131011	0.492111	0.00781479	0.00276054	0.00137157	0.0193123
OTU_655	k__Bacteria;p__Proteobacteria;c__Deltaproteobacteria;o__Bdellovibrionales;f__Bdellovibrionaceae;g__Bdellovibrio;s__	0.13306	0.489476	0.0110228	0.00275437	0.00685313	0.0234608
OTU_1382	k__Bacteria;p__Actinobacteria;c__unidentified_Actinobacteria	0.133155	0.489355	0.00504801	0.0110243	0.00274196	0.00137775
OTU_1021	k__Bacteria;p__Firmicutes;c__Bacilli;o__Bacillales;f__Paenibacillaceae;g__Paenibacillus;s__Paenibacillus_daejeonensis	0.134185	0.488042	0.0110128	0.0179177	0.00822588	0.0068947
OTU_876	k__Bacteria;p__Actinobacteria;c__Thermoleophilia;o__Gaiellales;f__;g__;s__	0.13423	0.487985	0.0508879	0.0578161	0.0589777	0.03587
OTU_505	k__Bacteria;p__Proteobacteria;c__Gammaproteobacteria;o__Legionellales	0.136008	0.485733	0.0147219	0	0	0.0441657
OTU_1043	k__Bacteria;p__Chloroflexi;c__Ktedonobacteria;o__JG30-KF-AS9;f__;g__;s__	0.136188	0.485507	0.0473083	0.0179363	0.0466335	0.0773553
OTU_1084	k__Bacteria;p__Proteobacteria;c__Alphaproteobacteria;o__Rhodospirillales;f__DA111;g__;s__	0.137125	0.48433	0.0068849	0.00824111	0.00137157	0.011042
OTU_973	k__Bacteria;p__Proteobacteria;c__Alphaproteobacteria;o__Rickettsiales;f__SM2D12;g__;s__	0.140457	0.480186	0.00690147	0	0.00274552	0.0179589
OTU_878	k__Bacteria;p__Saccharibacteria;c__;o__;f__;g__;s__	0.142867	0.47723	0.00366304	0.0068756	0.00411354	0
OTU_357	k__Bacteria;p__Actinobacteria;c__unidentified_Actinobacteria;o__Streptosporangiales;f__Streptosporangiaceae;g__Microbispora;s__	0.143155	0.476879	0.0577916	0.132122	0.0260563	0.015197
OTU_787	k__Bacteria;p__Proteobacteria;c__Alphaproteobacteria;o__Rhodospirillales;f__DA111;g__;s__	0.143255	0.476758	0.00872557	0.00274887	0.00274078	0.0206871
OTU_1743	k__Bacteria;p__Proteobacteria;c__Alphaproteobacteria;o__Sphingomonadales	0.1445	0.475245	0.0100995	0.0192943	0.00686024	0.00414388
OTU_703	k__Bacteria;p__Actinobacteria;c__Thermoleophilia;o__Solirubrobacterales;f__Patulibacteraceae;g__Patulibacter;s__	0.144553	0.475181	0.00732298	0.00824728	0.0137217	0
OTU_998	k__Bacteria;p__Firmicutes;c__Clostridia;o__Clostridiales;f__Lachnospiraceae;g__Tyzzerella_3	0.146442	0.472906	0.00917758	0.0165227	0.00411828	0.00689173
OTU_895	k__Bacteria;p__Proteobacteria;c__Deltaproteobacteria	0.147375	0.471788	0.00596265	0	0.00823181	0.00965613
OTU_54	k__Bacteria;p__Proteobacteria;c__Gammaproteobacteria;o__Xanthomonadales;f__Xanthomonadaceae;g__Dyella;s__Dyella_marensis	0.147495	0.471645	0.216283	0.419245	0.146767	0.0828365
OTU_213	k__Bacteria;p__Actinobacteria;c__unidentified_Actinobacteria;o__Corynebacteriales;f__Nocardiaceae;g__Nocardia;s__Nocardia_nova	0.149362	0.469426	0.118817	0.199468	0.0644557	0.092526
OTU_1466	k__Bacteria;p__Firmicutes;c__Bacilli;o__Bacillales;f__Paenibacillaceae;g__Paenibacillus	0.151881	0.466459	0.00274883	0.00687492	0.00137157	0
OTU_348	k__Bacteria	0.152085	0.466221	0.0027462	0.00137718	0.00686142	0
OTU_551	k__Bacteria;p__Bacteroidetes;c__Sphingobacteriia;o__Sphingobacteriales;f__Chitinophagaceae;g__Flavisolibacter	0.152135	0.466162	0.0431394	0.020668	0.0439034	0.064847
OTU_1662	k__Bacteria;p__Armatimonadetes;c__Chthonomonadetes;o__Chthonomonadales;f__Chthonomonadaceae;g__Chthonomonas;s__	0.153087	0.46505	0.00229617	0	0.00137157	0.00551694
OTU_1386	k__Bacteria;p__Acidobacteria;c__unidentified_Acidobacteria;o__Acidobacteriales;f__Acidobacteriaceae_.Subgroup_1.;g__;s__	0.153189	0.464932	0.00229657	0	0.00137276	0.00551694
OTU_1757	k__Bacteria;p__Chloroflexi;c__Ktedonobacteria;o__Ktedonobacterales	0.153242	0.46487	0.00229389	0.00551008	0.00137157	0
OTU_591	k__Bacteria;p__Firmicutes;c__Bacilli;o__Bacillales;f__Paenibacillaceae;g__Paenibacillus	0.155766	0.461948	0.0302693	0.0481813	0.0219416	0.020685
OTU_1875	k__Bacteria;p__Acidobacteria;c__unidentified_Acidobacteria;o__Acidobacteriales;f__Acidobacteriaceae_.Subgroup_1.;g__unidentified_Acidobacteria;s__Acidobacteria_bacterium_WWH111	0.15644	0.461173	0.00918146	0.00550391	0.00823062	0.0138099
OTU_1055	k__Bacteria;p__Chloroflexi;c__JG30-KF-CM66;o__;f__;g__;s__	0.156899	0.460647	0.00781614	0.00415007	0.0041159	0.0151824
OTU_960	k__Bacteria;p__Chloroflexi;c__Ktedonobacteria;o__Ktedonobacterales;f__Ktedonobacteraceae;g__Ktedonobacter	0.15764	0.459799	0.0215644	0.00962929	0.0246871	0.0303769
OTU_287	k__Bacteria;p__Actinobacteria;c__unidentified_Actinobacteria;o__Frankiales;f__;g__;s__	0.159123	0.45811	0.03485	0.0289427	0.0521186	0.0234886
OTU_736	k__Bacteria;p__Actinobacteria;c__unidentified_Actinobacteria;o__Frankiales;f__Acidothermaceae;g__Acidothermus;s__	0.161055	0.455926	0.0192598	0.0248098	0.0246848	0.00828479
OTU_602	k__Bacteria;p__Proteobacteria;c__Alphaproteobacteria;o__Rhodospirillales;f__Rhodospirillaceae;g__;s__	0.162073	0.454782	0.0270484	0.0110133	0.0383958	0.0317362
OTU_311	k__Bacteria;p__Proteobacteria;c__Alphaproteobacteria;o__Rhodospirillales;f__Rhodospirillaceae;g__;s__	0.164779	0.451764	0.0582839	0.0550899	0.0480074	0.0717545
OTU_605	k__Bacteria	0.165102	0.451407	0.0179133	0.00689209	0.0164624	0.0303854
OTU_738	k__Bacteria;p__Firmicutes;c__Clostridia;o__Clostridiales;f__Clostridiaceae_1;g__Fonticella;s__	0.165186	0.451313	0.02571	0.0358307	0.0150802	0.026219
OTU_1094	k__Bacteria;p__Firmicutes;c__Clostridia;o__Clostridiales;f__Clostridiaceae_1;g__Clostridium_sensu_stricto_12;s__Clostridium_pasteurianum	0.165519	0.450945	0.00643431	0.0110367	0.00137157	0.0068947
OTU_708	k__Bacteria;p__Actinobacteria;c__unidentified_Actinobacteria;o__Streptomycetales;f__Streptomycetaceae;g__Streptomyces	0.166262	0.450124	0.0192616	0.0275299	0.0178305	0.0124244
OTU_625	k__Bacteria;p__Proteobacteria;c__Deltaproteobacteria;o__GR-WP33-30;f__;g__;s__	0.166579	0.449776	0.0266253	0.0233805	0.0164589	0.0400365
OTU_93	k__Bacteria;p__Proteobacteria;c__Alphaproteobacteria;o__DB1-14;f__;g__;s__	0.170339	0.445666	0.0128889	0.00413155	0.00137039	0.0331648
OTU_163	k__Bacteria;p__Proteobacteria;c__Alphaproteobacteria;o__Rhodospirillales;f__Rhodospirillaceae;g__Ferrovibrio;s__alpha_proteobacterium_OR-84	0.170671	0.445306	0.00689138	0.0151799	0.00411354	0.00138072
OTU_106	k__Bacteria;p__Proteobacteria;c__Alphaproteobacteria;o__Rhodospirillales;f__Acetobacteraceae	0.17102	0.444929	0.560972	0.791698	0.434713	0.456504
OTU_353	k__Bacteria;p__Proteobacteria;c__Alphaproteobacteria;o__Rickettsiales;f__unidentified_Rickettsiales;g__Candidatus_Captivus;s__	0.171552	0.444354	0.00690147	0.015186	0.00137276	0.00414559
OTU_1334	k__Bacteria;p__Proteobacteria;c__Deltaproteobacteria;o__Myxococcales;f__Haliangiaceae;g__Haliangium;s__	0.172098	0.443764	0.00321582	0	0.00137157	0.00827588
OTU_1222	k__Bacteria;p__Proteobacteria;c__Alphaproteobacteria;o__Rickettsiales;f__unidentified_Rickettsiales;g__Candidatus_Captivus;s__	0.172573	0.443254	0.00322165	0.00137718	0	0.00828775
OTU_156	k__Bacteria;p__Chlorobi;c__Chlorobia;o__Chlorobiales;f__OPB56;g__;s__	0.173032	0.44276	0.00320196	0.00137169	0.00823418	0
OTU_824	k__Bacteria;p__Chloroflexi;c__Ktedonobacteria;o__Ktedonobacterales;f__Thermosporotrichaceae;g__Thermosporothrix;s__	0.173085	0.442703	0.0628141	0.0400158	0.102862	0.0455644
OTU_1022	k__Bacteria;p__Cyanobacteria;c__unidentified_Cyanobacteria;o__SubsectionIII;f__FamilyI	0.173417	0.442347	0.00320269	0.00138336	0.0082247	0
OTU_1141	k__Bacteria;p__Chloroflexi;c__Ktedonobacteria;o__JG30-KF-AS9;f__;g__;s__	0.176188	0.439393	0.00871999	0.00275437	0.00959746	0.0138081
OTU_1218	k__Bacteria;p__Verrucomicrobia;c__OPB35_soil_group;o__unidentified_OPB35_soil_group;f__unidentified_OPB35_soil_group;g__Pedosphaera;s__	0.178634	0.436811	0.00595302	0.0137443	0.00411472	0
OTU_1810	k__Bacteria;p__Firmicutes;c__Clostridia;o__Clostridiales;f__Gracilibacteraceae;g__Lutispora;s__	0.180942	0.434395	0.00459574	0.00965398	0	0.00413326
OTU_646	k__Bacteria;p__Chloroflexi;c__Ktedonobacteria;o__Ktedonobacterales;f__FCPS473;g__;s__	0.181256	0.434068	0.0188403	0.0110422	0.0137122	0.0317665
OTU_1231	k__Bacteria;p__Proteobacteria;c__Deltaproteobacteria;o__Myxococcales;f__Polyangiaceae;g__Sorangium;s__	0.181402	0.433916	0.00413388	0	0.00274552	0.00965613
OTU_1749	k__Bacteria;p__Firmicutes;c__Clostridia;o__Clostridiales;f__Peptostreptococcaceae;g__Peptoclostridium	0.18285	0.432414	0.0238608	0.0344398	0.0205772	0.0165654
OTU_482	k__Bacteria;p__Chloroflexi;c__Ktedonobacteria;o__Ktedonobacterales	0.18716	0.427989	0.083035	0.0385864	0.115197	0.0953218
OTU_237	k__Bacteria;p__Chloroflexi;c__Ktedonobacteria;o__Ktedonobacterales	0.187366	0.427779	0.12929	0.115629	0.159092	0.113151
OTU_91	k__Bacteria;p__Proteobacteria;c__Alphaproteobacteria;o__Rhizobiales	0.188089	0.427044	0.887786	0.934321	1.11626	0.612775
OTU_268	k__Bacteria;p__Chloroflexi;c__Ktedonobacteria;o__JG30-KF-AS9;f__;g__;s__	0.188307	0.426823	0.097261	0.0523706	0.133041	0.106371
OTU_46	k__Bacteria;p__Proteobacteria;c__Alphaproteobacteria;o__Rhodospirillales;f__I-10;g__;s__	0.18853	0.426597	0.768077	0.597466	0.695185	1.01158
OTU_43	k__Bacteria;p__Proteobacteria;c__Betaproteobacteria;o__Nitrosomonadales;f__Nitrosomonadaceae;g__Nitrosospira;s__	0.189104	0.426015	0.103908	0.0455835	0.0603326	0.205809
OTU_364	k__Bacteria;p__Actinobacteria;c__Acidimicrobiia;o__Acidimicrobiales;f__;g__;s__	0.189189	0.425929	0.0495324	0.0633819	0.0576144	0.027601
OTU_354	k__Bacteria;p__Proteobacteria	0.189243	0.425875	0.082609	0.0949876	0.0493755	0.103464
OTU_1639	k__Bacteria;p__Proteobacteria;c__Deltaproteobacteria;o__Oligoflexales;f__;g__;s__	0.189865	0.425246	0.0110086	0.0192888	0.00822588	0.00551101
OTU_273	k__Bacteria;p__Proteobacteria;c__Betaproteobacteria;o__Burkholderiales;f__Comamonadaceae;g__Pseudacidovorax;s__	0.191221	0.423882	0.005519	0.013815	0.00274196	0
OTU_1605	k__Bacteria;p__Chloroflexi;c__Ktedonobacteria;o__JG30-KF-AS9;f__;g__;s__	0.191913	0.423187	0.0376457	0.0220568	0.0383993	0.0524809
OTU_1118	k__Bacteria;p__Proteobacteria;c__Alphaproteobacteria;o__Rhodospirillales;f__Rhodospirillaceae;g__Dongia;s__	0.191977	0.423123	0.00782155	0.00553342	0.00137276	0.0165585
OTU_1196	k__Bacteria;p__Firmicutes;c__Bacilli;o__Bacillales;f__Paenibacillaceae;g__Paenibacillus	0.192825	0.422275	0.0142265	0.0206543	0.00822944	0.0137958
OTU_503	k__Bacteria;p__Proteobacteria;c__Betaproteobacteria;o__TRA3-20;f__unidentified_TRA3-20;g__unidentified_TRA3-20;s__beta_proteobacterium_WY25	0.194273	0.420833	0.0921311	0.125198	0.0960172	0.0551785
OTU_318	k__Bacteria;p__Chloroflexi;c__Ktedonobacteria;o__JG30-KF-AS9;f__;g__;s__	0.194984	0.420127	0.0689283	0.0372497	0.0507435	0.118792
OTU_498	k__Bacteria;p__Proteobacteria;c__Deltaproteobacteria;o__Myxococcales;f__Haliangiaceae;g__Haliangium;s__	0.196222	0.418903	0.0371752	0.0289125	0.0287971	0.053816
OTU_61	k__Bacteria;p__Acidobacteria;c__unidentified_Acidobacteria;o__Subgroup_3;f__unidentified_Acidobacteria;g__Bryobacter;s__	0.196525	0.418603	0.0284554	0.0441775	0.0370432	0.00414559
OTU_631	k__Bacteria;p__Proteobacteria;c__Alphaproteobacteria;o__Rhodospirillales;f__Rhodospirillaceae;g__Defluviicoccus;s__	0.197977	0.417175	0.0151518	0.00828229	0.015092	0.022081
OTU_1461	k__Bacteria;p__Actinobacteria;c__unidentified_Actinobacteria;o__Micrococcales;f__Micrococcaceae;g__Arthrobacter	0.198076	0.417078	0.00732676	0.00550323	0.0137122	0.00276488
OTU_1173	k__Bacteria;p__Actinobacteria;c__unidentified_Actinobacteria;o__Catenulisporales;f__Actinospicaceae;g__Actinospica;s__bacterium_Ellin5012	0.198647	0.416518	0.00367685	0.00966015	0.00137039	0
OTU_436	k__Bacteria;p__Proteobacteria;c__Alphaproteobacteria;o__Rhodospirillales;f__unidentified_Rhodospirillales;g__Geminicoccus;s__	0.20181	0.413438	0.00825374	0.00828846	0.015092	0.00138072
OTU_261	k__Bacteria;p__Actinobacteria;c__Thermoleophilia;o__Solirubrobacterales	0.203331	0.411967	0.00919218	0.0220658	0.00137157	0.00413919
OTU_997	k__Bacteria;p__Chloroflexi;c__Ktedonobacteria;o__JG30-KF-AS9;f__unidentified_JG30-KF-AS9;g__unidentified_JG30-KF-AS9;s__Chloroflexi_bacterium_Ellin7237	0.203856	0.411462	0.00551179	0	0.00548274	0.0110526
OTU_432	k__Bacteria;p__Chloroflexi;c__Ktedonobacteria;o__Ktedonobacterales	0.205562	0.409825	0.124281	0.0303391	0.205762	0.136743
OTU_656	k__Bacteria;p__Chloroflexi;c__Ktedonobacteria;o__JG30-KF-AS9;f__;g__;s__	0.205753	0.409642	0.0257152	0.0165234	0.0219547	0.0386676
OTU_113	k__Bacteria;p__Acidobacteria;c__unidentified_Acidobacteria;o__Subgroup_4;f__unidentified_Acidobacteria;g__Blastocatella;s__	0.206202	0.409213	0.00598562	0	0.00137276	0.0165841
OTU_760	k__Bacteria;p__Chloroflexi;c__Ktedonobacteria;o__Ktedonobacterales	0.206579	0.408853	0.0151358	0.00553342	0.0260634	0.0138106
OTU_743	k__Bacteria;p__Gemmatimonadetes;c__unidentified_Gemmatimonadetes;o__Gemmatimonadales;f__Gemmatimonadaceae;g__Gemmatimonas;s__	0.208016	0.407485	0.0137623	0.00276671	0.0205653	0.017955
OTU_83	k__Bacteria;p__Proteobacteria;c__Gammaproteobacteria;o__Xanthomonadales;f__unidentified_Xanthomonadales;g__Acidibacter	0.208083	0.407422	0.525661	0.243639	0.555279	0.778065
OTU_333	k__Bacteria;p__Firmicutes;c__Bacilli;o__Bacillales;f__;g__;s__	0.208706	0.406831	0.00551195	0.0137903	0.00274552	0
OTU_933	k__Bacteria;p__Chloroflexi;c__Ktedonobacteria;o__Ktedonobacterales	0.210354	0.405274	0.0137599	0.00827062	0.0192044	0.0138047
OTU_48	k__Bacteria;p__Proteobacteria;c__Alphaproteobacteria;o__Sphingomonadales;f__Sphingomonadaceae;g__Sphingomonas	0.211179	0.404498	0.0899138	0.128012	0.0767939	0.0649352
OTU_686	k__Bacteria;p__Firmicutes;c__Bacilli;o__Bacillales;f__Alicyclobacillaceae;g__Tumebacillus	0.211847	0.40387	0.269306	0.485874	0.139904	0.18214
OTU_111	k__Bacteria;p__Gemmatimonadetes;c__unidentified_Gemmatimonadetes;o__Gemmatimonadales;f__Gemmatimonadaceae;g__Gemmatimonas	0.211894	0.403827	0.264821	0.181774	0.268865	0.343824
OTU_158	k__Bacteria;p__Proteobacteria;c__Alphaproteobacteria;o__Rhodospirillales;f__Rhodospirillaceae;g__Ferrovibrio;s__	0.212524	0.403236	0.0133445	0.0289956	0.00274315	0.00829463
OTU_1783	k__Bacteria;p__Proteobacteria;c__Betaproteobacteria;o__Burkholderiales;f__Oxalobacteraceae;g__Paucimonas;s__	0.215193	0.400748	0.0252029	0.0302691	0.0315474	0.0137924
OTU_676	k__Bacteria;p__Actinobacteria;c__Acidimicrobiia;o__Acidimicrobiales;f__Acidimicrobiaceae;g__CL500-29_marine_group;s__	0.215996	0.400004	0.00183417	0.00276054	0.00274196	0
OTU_1245	k__Bacteria;p__Acidobacteria;c__unidentified_Acidobacteria;o__Subgroup_3;f__unidentified_Acidobacteria;g__Candidatus_Solibacter;s__	0.215996	0.400003	0.00183445	0	0.00274315	0.00276019
OTU_157	k__Bacteria;p__Bacteroidetes;c__Sphingobacteriia;o__Sphingobacteriales;f__Chitinophagaceae	0.215998	0.400002	0.00183496	0.00276054	0.00274433	0
OTU_1525	k__Bacteria;p__Firmicutes;c__Bacilli	0.216378	0.399651	0.00505162	0.00964231	0.00137039	0.00414216
OTU_840	k__Bacteria;p__Gemmatimonadetes;c__unidentified_Gemmatimonadetes;o__Gemmatimonadales;f__Gemmatimonadaceae;g__Gemmatimonas;s__	0.21849	0.397704	0.00916786	0.00826445	0.0137205	0.00551866
OTU_1243	k__Bacteria;p__Proteobacteria;c__Alphaproteobacteria;o__Rhodospirillales;f__Acetobacteraceae	0.22025	0.39609	0.0321296	0.0413209	0.019202	0.0358658
OTU_1868	k__Bacteria;p__Acidobacteria;c__unidentified_Acidobacteria;o__Subgroup_6;f__;g__;s__	0.220536	0.395829	0.0100919	0.0165337	0.00959983	0.00414216
OTU_487	k__Bacteria;p__Thermomicrobia;c__unidentified_Thermomicrobia;o__JG30-KF-CM45;f__;g__;s__	0.22132	0.395114	0.0270783	0.0454573	0.0150838	0.0206939
OTU_938	k__Bacteria;p__Chloroflexi;c__Ktedonobacteria;o__JG30-KF-AS9	0.221421	0.395022	0.00596114	0	0.00959864	0.00828479
OTU_474	k__Bacteria;p__Firmicutes;c__Clostridia;o__Clostridiales;f__Clostridiaceae_1;g__Clostridium_sensu_stricto_1;s__Clostridium_perfringens	0.223122	0.393477	0.0321488	0.0730188	0.00548511	0.0179426
OTU_371	k__Bacteria;p__Acidobacteria;c__unidentified_Acidobacteria;o__Subgroup_3;f__unidentified_Acidobacteria;g__Bryobacter;s__	0.223369	0.393253	0.0775716	0.0661513	0.0630876	0.103476
OTU_869	k__Bacteria;p__Proteobacteria;c__Alphaproteobacteria;o__Sphingomonadales;f__Erythrobacteraceae;g__Altererythrobacter;s__	0.223629	0.393018	0.00824972	0.0123843	0.00960338	0.00276144
OTU_1474	k__Bacteria;p__Proteobacteria;c__Alphaproteobacteria;o__Sphingomonadales;f__Sphingomonadaceae;g__Sphingomonas	0.223974	0.392706	0.00503378	0.00824111	0.00686024	0
OTU_408	k__Bacteria;p__Acidobacteria;c__unidentified_Acidobacteria;o__Subgroup_6;f__;g__;s__	0.224129	0.392565	0.00552331	0.00965947	0	0.00691047
OTU_530	k__Bacteria;p__Chloroflexi;c__Ktedonobacteria;o__Ktedonobacterales;f__Thermosporotrichaceae;g__Thermosporothrix;s__	0.224155	0.392542	0.0412732	0.0192908	0.0658438	0.0386851
OTU_176	k__Bacteria;p__Proteobacteria;c__Alphaproteobacteria;o__Caulobacterales;f__Caulobacteraceae;g__Asticcacaulis	0.2266	0.390342	0.00412102	0.0068756	0.00548748	0
OTU_1287	k__Bacteria;p__Firmicutes;c__OPB54	0.227307	0.389708	0.00551282	0.00826995	0.00137039	0.00689813
OTU_249	k__Bacteria;p__Chloroflexi;c__TK10;o__;f__;g__;s__	0.228618	0.388537	0.0036741	0	0.00411354	0.00690875
OTU_205	k__Bacteria;p__Proteobacteria;c__Alphaproteobacteria;o__Caulobacterales;f__Caulobacteraceae;g__Phenylobacterium;s__	0.2306	0.386775	0.179853	0.143192	0.163209	0.233157
OTU_1120	k__Bacteria;p__Cyanobacteria;c__unidentified_Cyanobacteria;o__SubsectionIV;f__FamilyI	0.23238	0.385201	0.00642222	0.0110078	0.00274315	0.00551569
OTU_1776	k__Bacteria;p__Proteobacteria;c__Alphaproteobacteria;o__Rhizobiales;f__Phyllobacteriaceae;g__Aminobacter;s__	0.233253	0.384432	0.00366931	0.00415007	0.00685787	0
OTU_1482	k__Bacteria;p__Firmicutes;c__Bacilli;o__Bacillales;f__Paenibacillaceae	0.235292	0.382644	0.00321967	0.00552108	0	0.00413794
OTU_499	k__Bacteria;p__Acidobacteria;c__unidentified_Acidobacteria;o__Subgroup_4;f__unidentified_Acidobacteria;g__Blastocatella;s__	0.235745	0.382248	0.0164744	0.0123685	0.035674	0.00138072
OTU_378	k__Bacteria;p__Actinobacteria;c__unidentified_Actinobacteria;o__Propionibacteriales;f__Nocardioidaceae;g__Nocardioides	0.236103	0.381936	0.00642893	0.0110373	0.00548629	0.00276316
OTU_976	k__Bacteria;p__Chloroflexi;c__Ktedonobacteria;o__JG30-KF-AS9;f__;g__;s__	0.236449	0.381633	0.0109919	0.00962996	0.0192032	0.00414263
OTU_580	k__Bacteria;p__Firmicutes;c__Clostridia;o__Clostridiales;f__Clostridiaceae_1;g__Clostridium_sensu_stricto_13	0.237045	0.381114	0.0147021	0.022074	0.00823062	0.0138017
OTU_610	k__Bacteria;p__Firmicutes;c__Bacilli;o__Bacillales;f__Alicyclobacillaceae;g__Alicyclobacillus	0.237163	0.381012	0.0298414	0.0385624	0.012343	0.0386188
OTU_130	k__Bacteria;p__Chloroflexi;c__KD4-96;o__;f__;g__;s__	0.237804	0.380455	0.0142442	0.0262241	0.00959983	0.00690875
OTU_1505	k__Bacteria;p__WD272;c__;o__;f__;g__;s__	0.238188	0.380122	0.0789566	0.0606385	0.0713052	0.104926
OTU_509	k__Bacteria;p__Proteobacteria;c__Deltaproteobacteria;o__Myxococcales;f__Cystobacteraceae;g__Anaeromyxobacter;s__bacterium_enrichment_culture_clone_auto65_4W	0.242903	0.376058	0.0770927	0.0605643	0.0617172	0.108996
OTU_110	k__Bacteria;p__Chloroflexi;c__Ktedonobacteria;o__JG30-KF-AS9;f__;g__;s__	0.243601	0.375461	0.414581	0.198512	0.459502	0.585728
OTU_653	k__Bacteria;p__Proteobacteria;c__Betaproteobacteria;o__Burkholderiales;f__Burkholderiaceae;g__Burkholderia	0.243773	0.375314	0.0173859	0.00415007	0.0466299	0.00137775
OTU_1020	k__Bacteria;p__Proteobacteria;c__Alphaproteobacteria;o__Sphingomonadales;f__Erythrobacteraceae	0.246089	0.373342	0.0164844	0.00962929	0.0315486	0.00827542
OTU_1275	k__Bacteria;p__Chloroflexi;c__Ktedonobacteria;o__Ktedonobacterales	0.2469	0.372654	0.00366198	0.00137169	0.00823181	0.00138244
OTU_40	k__Bacteria;p__Proteobacteria;c__Alphaproteobacteria;o__Rhizobiales;f__Hyphomicrobiaceae;g__Hyphomicrobium;s__Hyphomicrobium_zavarzinii	0.248239	0.371522	0.0284717	0.0469209	0.0260575	0.0124368
OTU_377	k__Bacteria;p__Verrucomicrobia;c__OPB35_soil_group;o__;f__;g__;s__	0.248632	0.371191	0.00320263	0.00137169	0.0068555	0.00138072
OTU_825	k__Bacteria;p__Chloroflexi;c__Ktedonobacteria;o__JG30-KF-AS9;f__;g__;s__	0.249789	0.370217	0.0128774	0	0.008233	0.0303991
OTU_1520	k__Bacteria;p__Firmicutes;c__Bacilli;o__Bacillales;f__Paenibacillaceae;g__Paenibacillus	0.250081	0.369972	0.00183237	0.00412673	0.00137039	0
OTU_136	k__Bacteria;p__Verrucomicrobia;c__OPB35_soil_group;o__;f__;g__;s__	0.25062	0.369519	0.00183866	0	0.00137039	0.00414559
OTU_1304	k__Bacteria;p__Chloroflexi;c__SHA-26;o__;f__;g__;s__	0.250717	0.369438	0.00183597	0.00137169	0	0.00413622
OTU_1381	k__Bacteria;p__Verrucomicrobia;c__Spartobacteria;o__Chthoniobacterales	0.250968	0.369228	0.00183031	0.00412055	0.00137039	0
OTU_1219	k__Bacteria	0.251048	0.369161	0.00367534	0	0.00274078	0.00828525
OTU_203	k__Bacteria;p__Chloroflexi;c__Ktedonobacteria;o__JG30-KF-AS9;f__;g__;s__	0.251164	0.369063	0.625431	0.343196	0.809224	0.723873
OTU_1760	k__Bacteria;p__Acidobacteria;c__unidentified_Acidobacteria;o__Acidobacteriales;f__Acidobacteriaceae_.Subgroup_1.;g__;s__	0.251215	0.36902	0.0018381	0.00137169	0	0.00414263
OTU_1744	k__Bacteria;p__Chloroflexi;c__Ktedonobacteria;o__Ktedonobacterales	0.251333	0.368922	0.00229567	0	0.00274315	0.00414388
OTU_1626	k__Bacteria;p__Armatimonadetes;c__;o__;f__;g__;s__	0.251427	0.368843	0.00183582	0.00412673	0	0.00138072
OTU_1735	k__Bacteria;p__Proteobacteria;c__Alphaproteobacteria;o__Rickettsiales;f__AKIW1012;g__unidentified_AKIW1012;s__Candidatus_Caedibacter_acanthamoebae	0.251427	0.368843	0.00183582	0.00412673	0	0.00138072
OTU_1841	k__Bacteria;p__Firmicutes;c__Bacilli;o__Bacillales;f__Paenibacillaceae;g__Paenibacillus;s__Paenibacillus_taiwanensis	0.251499	0.368783	0.00184093	0.00137718	0	0.00414559
OTU_1054	k__Bacteria;p__Proteobacteria;c__Alphaproteobacteria;o__Caulobacterales;f__Caulobacteraceae;g__Caulobacter;s__	0.251998	0.368366	0.00183254	0.00412605	0.00137157	0
OTU_1597	k__Bacteria;p__Firmicutes;c__Clostridia;o__Clostridiales;f__Clostridiaceae_1	0.251998	0.368366	0.00183254	0.00412605	0.00137157	0
OTU_1077	k__Bacteria	0.252039	0.368332	0.00229067	0	0.00411354	0.00275847
OTU_1794	k__Bacteria;p__Firmicutes;c__Clostridia;o__Clostridiales;f__Ruminococcaceae	0.252096	0.368284	0.00184055	0.00414389	0	0.00137775
OTU_1191	k__Bacteria;p__Chloroflexi;c__Ktedonobacteria;o__JG30-KF-AS9;f__;g__;s__	0.252136	0.368251	0.0018292	0.00137169	0.00411591	0
OTU_1337	k__Bacteria;p__Actinobacteria;c__unidentified_Actinobacteria;o__Propionibacteriales;f__Nocardioidaceae;g__Kribbella	0.252299	0.368114	0.00686801	0.0123782	0.00822588	0
OTU_1712	k__Bacteria;p__Firmicutes;c__Bacilli;o__Bacillales;f__Paenibacillaceae;g__Brevibacillus	0.252316	0.368101	0.00183376	0.00412055	0	0.00138072
OTU_1409	k__Bacteria;p__Chloroflexi;c__Ktedonobacteria;o__JG30-KF-AS9;f__;g__;s__	0.252436	0.368	0.00229124	0	0.00411353	0.00276019
OTU_1302	k__Bacteria;p__Acidobacteria;c__unidentified_Acidobacteria;o__Acidobacteriales;f__Acidobacteriaceae_.Subgroup_1.;g__Telmatobacter;s__	0.252716	0.367766	0.0453756	0.0330241	0.0658486	0.0372541
OTU_1450	k__Bacteria;p__Firmicutes;c__Clostridia;o__Clostridiales;f__Clostridiaceae_1	0.253188	0.367373	0.00183559	0.00412605	0	0.00138072
OTU_784	k__Bacteria;p__Firmicutes;c__Erysipelotrichia;o__Erysipelotrichales;f__Erysipelotrichaceae;g__Asteroleplasma;s__	0.25338	0.367213	0.00869266	0.00825345	0.0178245	0
OTU_554	k__Bacteria;p__Chlorobi;c__Chlorobia;o__Chlorobiales;f__OPB56;g__;s__	0.253523	0.367094	0.00183199	0	0.00411353	0.00138244
OTU_1228	k__Bacteria;p__Proteobacteria;c__Alphaproteobacteria	0.254224	0.366512	0.00321507	0.00690443	0.00274078	0
OTU_1217	k__Bacteria;p__Bacteroidetes;c__Sphingobacteriia;o__Sphingobacteriales;f__Chitinophagaceae;g__Flavisolibacter;s__	0.254261	0.366481	0.0234001	0.0110188	0.0260552	0.0331263
OTU_401	k__Bacteria;p__Firmicutes;c__Bacilli;o__Bacillales;f__Planococcaceae;g__Lysinibacillus;s__Lysinibacillus_xylanilyticus	0.254348	0.366408	0.055018	0.0770884	0.0534878	0.0344778
OTU_1699	k__Bacteria;p__Firmicutes;c__Clostridia;o__Clostridiales;f__Lachnospiraceae;g__Epulopiscium	0.254754	0.366072	0.00459741	0.00137718	0.00274315	0.00967191
OTU_1051	k__Bacteria;p__Firmicutes;c__Clostridia;o__Clostridiales;f__Ruminococcaceae	0.257428	0.363861	0.00551802	0.00828161	0	0.00827245
OTU_1026	k__Bacteria;p__Proteobacteria;c__Deltaproteobacteria;o__Myxococcales;f__Haliangiaceae;g__Haliangium;s__	0.257827	0.363533	0.00550692	0	0.008233	0.00828775
OTU_1594	k__Bacteria;p__Bacteroidetes;c__Sphingobacteriia;o__Sphingobacteriales;f__Chitinophagaceae;g__Chitinophaga;s__Chitinophaga_filiformis	0.25805	0.363349	0.0349473	0.00549224	0.00685668	0.0924931
OTU_57	k__Bacteria;p__Chloroflexi;c__Ktedonobacteria;o__JG30-KF-AS9;f__;g__;s__	0.258442	0.363027	0.659681	0.299326	0.805227	0.874491
OTU_532	k__Bacteria	0.259247	0.362366	0.0253375	0.00415007	0	0.0718624
OTU_959	k__Bacteria;p__Actinobacteria;c__Acidimicrobiia;o__Acidimicrobiales	0.259524	0.362139	0.00689342	0.00825895	0.00137039	0.0110509
OTU_172	k__Bacteria;p__Verrucomicrobia;c__Spartobacteria;o__Chthoniobacterales;f__FukuN18_freshwater_group;g__;s__	0.259679	0.362012	0.00552394	0.0151991	0.00137276	0
OTU_301	k__Bacteria;p__Proteobacteria;c__Deltaproteobacteria;o__Myxococcales;f__Sandaracinaceae;g__;s__	0.261574	0.360464	0.00829068	0.0193423	0	0.00552975
OTU_713	k__Bacteria;p__Proteobacteria;c__Alphaproteobacteria;o__Sphingomonadales;f__Sphingomonadaceae;g__Sphingomonas	0.263782	0.35867	0.0540798	0.0288954	0.0919298	0.0414141
OTU_206	k__Bacteria;p__Proteobacteria;c__Gammaproteobacteria;o__Enterobacteriales;f__Enterobacteriaceae;g__Enterobacter	0.265496	0.357283	0.0376527	0.0923522	0.0178411	0.00276488
OTU_714	k__Bacteria;p__Chlamydiae;c__unidentified_Chlamydiae;o__Chlamydiales	0.265577	0.357219	0.0183777	0	0	0.055133
OTU_680	k__Bacteria;p__Firmicutes;c__Clostridia;o__Clostridiales;f__Clostridiaceae_1;g__Clostridium_sensu_stricto_3;s__	0.266623	0.356376	0.011928	0.0179054	0.00959983	0.00827885
OTU_1107	k__Bacteria;p__Proteobacteria;c__Betaproteobacteria;o__Burkholderiales;f__Oxalobacteraceae;g__Massilia	0.266646	0.356357	0.0898301	0.133389	0.0795536	0.0565473
OTU_1751	k__Bacteria;p__Proteobacteria;c__Alphaproteobacteria;o__Sphingomonadales;f__Sphingomonadaceae;g__Sphingomonas;s__Sphingomonas_faeni	0.266855	0.356189	0.0193215	0.0386674	0.00686142	0.0124355
OTU_1322	k__Bacteria;p__Firmicutes;c__Bacilli;o__Bacillales;f__Bacillaceae;g__;s__	0.267163	0.355941	0.00918456	0.0192936	0.00274315	0.00551694
OTU_196	k__Bacteria;p__Proteobacteria;c__Gammaproteobacteria;o__Xanthomonadales;f__unidentified_Xanthomonadales;g__Steroidobacter;s__	0.267231	0.355887	0.00828816	0.023482	0	0.00138244
OTU_1074	k__Bacteria;p__Actinobacteria;c__Thermoleophilia;o__Gaiellales;f__;g__;s__	0.267837	0.3554	0.0142139	0.00685843	0.0164624	0.0193209
OTU_1592	k__Bacteria;p__Actinobacteria;c__unidentified_Actinobacteria;o__Frankiales;f__Acidothermaceae;g__Acidothermus;s__	0.267891	0.355357	0.00917448	0.01378	0.00822944	0.00551398
OTU_843	k__Bacteria;p__Bacteroidetes;c__Sphingobacteriia;o__Sphingobacteriales;f__Chitinophagaceae;g__Niastella	0.268159	0.355142	0.00918508	0.00552175	0.00822707	0.0138064
OTU_86	k__Bacteria;p__Proteobacteria;c__Betaproteobacteria;o__Burkholderiales;f__Comamonadaceae;g__Acidovorax;s__Acidovorax_delafieldii	0.270065	0.353618	0.0100841	0.0151627	0.0150897	0
OTU_902	k__Bacteria;p__Chloroflexi;c__Ktedonobacteria;o__JG30-KF-AS9;f__;g__;s__	0.270834	0.353005	0.0193171	0.0110435	0.00960338	0.0373044
OTU_274	k__Bacteria;p__Bacteroidetes;c__Flavobacteriia;o__Flavobacteriales	0.27149	0.352483	0.0022951	0.0055149	0.00137039	0
OTU_501	k__Bacteria;p__Armatimonadetes;c__;o__;f__;g__;s__	0.27149	0.352483	0.0022951	0.0055149	0.00137039	0
OTU_141	k__Bacteria;p__Bacteroidetes;c__Sphingobacteriia;o__Sphingobacteriales;f__Chitinophagaceae;g__Terrimonas;s__	0.271689	0.352324	0.00459178	0.0110298	0.00274552	0
OTU_1563	k__Bacteria;p__Proteobacteria;c__Deltaproteobacteria;o__Myxococcales;f__mle1-27;g__;s__	0.271689	0.352324	0.00229589	0.0055149	0.00137276	0
OTU_1515	k__Bacteria;p__Actinobacteria;c__Acidimicrobiia;o__Acidimicrobiales;f__Acidimicrobiaceae;g__;s__	0.272042	0.352044	0.00228754	0.00549224	0.00137039	0
OTU_1867	k__Bacteria;p__Firmicutes;c__Clostridia;o__Clostridiales;f__Clostridiaceae_1	0.272042	0.352044	0.00228754	0.00549224	0.00137039	0
OTU_1650	k__Bacteria;p__Acidobacteria;c__unidentified_Acidobacteria;o__Subgroup_3;f__unidentified_Acidobacteria;g__Bryobacter;s__	0.272458	0.351714	0.00229677	0	0.00137039	0.00551991
OTU_874	k__Bacteria;p__Firmicutes;c__Clostridia;o__Clostridiales;f__Clostridiaceae_1;g__Fonticella;s__	0.272637	0.351572	0.0123733	0.0165179	0.0150909	0.00551101
OTU_585	k__Bacteria;p__Proteobacteria;c__Deltaproteobacteria;o__Oligoflexales;f__;g__;s__	0.272681	0.351538	0.00229921	0.00552725	0.00137039	0
OTU_1408	k__Bacteria;p__Chloroflexi;c__Ktedonobacteria;o__Ktedonobacterales;f__Ktedonobacteraceae;g__Ktedonobacter	0.27309	0.351213	0.0022856	0.00137169	0.00548511	0
OTU_619	k__Bacteria;p__Proteobacteria;c__Alphaproteobacteria;o__Sphingomonadales;f__;g__;s__	0.27309	0.351213	0.0022856	0.00137169	0.00548511	0
OTU_1089	k__Bacteria;p__Firmicutes;c__Bacilli;o__Bacillales;f__Paenibacillaceae;g__Paenibacillus;s__Paenibacillus_chartarius	0.273877	0.35059	0.0064278	0.0096533	0.00548748	0.00414263
OTU_1793	k__Bacteria;p__Acidobacteria;c__unidentified_Acidobacteria;o__Subgroup_6;f__unidentified_Acidobacteria;g__unidentified_Acidobacteria;s__Acidobacteria_bacterium_LWQ117	0.277482	0.347754	0.00870149	0.00274887	0.0150802	0.00827542
OTU_1053	k__Bacteria;p__Proteobacteria;c__Deltaproteobacteria;o__Myxococcales;f__Haliangiaceae;g__Haliangium;s__	0.279163	0.346439	0.00919517	0.00962929	0	0.0179562
OTU_26	k__Bacteria;p__Bacteroidetes;c__Sphingobacteriia;o__Sphingobacteriales;f__env.OPS_17;g__;s__	0.279311	0.346324	0.00736171	0.0110428	0.00137039	0.00967191
OTU_230	k__Bacteria;p__Chloroflexi;c__Ktedonobacteria;o__JG30-KF-AS9;f__;g__;s__	0.280652	0.345279	0.270278	0.162802	0.367629	0.280404
OTU_1220	k__Bacteria;p__Chloroflexi;c__JG30-KF-CM66;o__;f__;g__;s__	0.280997	0.345011	0.00596709	0.00965947	0.00548629	0.0027555
OTU_671	k__Bacteria;p__Bacteroidetes;c__Sphingobacteriia;o__Sphingobacteriales;f__Chitinophagaceae	0.28181	0.34438	0.0114563	0.00276671	0.0205653	0.0110369
OTU_68	k__Bacteria;p__Proteobacteria;c__Alphaproteobacteria;o__Rhodobacterales;f__Rhodobacteraceae;g__Rhodobacter;s__	0.284883	0.342006	0.0100751	0.00550323	0.0205795	0.00414263
OTU_52	k__Bacteria;p__Verrucomicrobia;c__OPB35_soil_group;o__;f__;g__;s__	0.285074	0.341859	0.0101207	0.0248757	0.00548629	0
OTU_478	k__Bacteria;p__Bacteroidetes;c__Sphingobacteriia;o__Sphingobacteriales;f__Chitinophagaceae;g__Flavisolibacter;s__	0.285532	0.341506	0.0275526	0.0137622	0.019202	0.0496937
OTU_1294	k__Bacteria;p__Actinobacteria;c__Acidimicrobiia;o__Acidimicrobiales;f__;g__;s__	0.28737	0.340097	0.00596101	0.0110202	0.00548511	0.00137775
OTU_1136	k__Bacteria;p__Bacteroidetes;c__Sphingobacteriia;o__Sphingobacteriales;f__Chitinophagaceae	0.287431	0.34005	0.00596522	0	0.00685194	0.0110437
OTU_926	k__Bacteria;p__Proteobacteria;c__Alphaproteobacteria;o__Rhodospirillales;f__DA111;g__;s__	0.287692	0.33985	0.00643152	0.00412055	0.00274315	0.0124308
OTU_852	k__Bacteria;p__Firmicutes;c__Bacilli;o__Bacillales;f__Bacillaceae;g__Bacillus	0.289476	0.338488	0.00963525	0.00826445	0.00960101	0.0110403
OTU_209	k__Bacteria;p__Proteobacteria;c__Alphaproteobacteria;o__Rhodospirillales;f__unidentified_Rhodospirillales;g__Reyranella;s__	0.28959	0.338401	0.0142166	0.0137739	0.0178281	0.0110479
OTU_1695	k__Bacteria;p__Proteobacteria;c__Betaproteobacteria;o__Burkholderiales;f__Oxalobacteraceae;g__Massilia	0.291405	0.337022	0.18428	0.244911	0.18243	0.125499
OTU_1080	k__Bacteria;p__Chloroflexi;c__Ktedonobacteria;o__JG30-KF-AS9;f__;g__;s__	0.29158	0.336889	0.00641625	0.0041384	0.0123489	0.00276144
OTU_1344	k__Bacteria;p__Proteobacteria;c__Alphaproteobacteria;o__Rhizobiales	0.292025	0.336552	0.00595988	0.0069106	0.010969	0
OTU_1167	k__Bacteria;p__Proteobacteria;c__Deltaproteobacteria;o__Oligoflexales;f__;g__;s__	0.292459	0.336223	0.00688654	0.00411506	0.0041159	0.0124287
OTU_624	k__Bacteria;p__Firmicutes;c__Negativicutes;o__Selenomonadales;f__Veillonellaceae;g__Anaerosinus;s__	0.29385	0.335173	0.0142187	0.0288754	0.00411472	0.00966597
OTU_1210	k__Bacteria;p__Chloroflexi;c__Ktedonobacteria;o__Ktedonobacterales;f__Ktedonobacteraceae	0.295561	0.333885	0.0146703	0.0123967	0.0219487	0.00966551
OTU_962	k__Bacteria;p__Firmicutes;c__Bacilli;o__Bacillales;f__Paenibacillaceae;g__Paenibacillus	0.295658	0.333813	0.00275353	0.00551008	0.00137276	0.00137775
OTU_1814	k__Bacteria;p__Proteobacteria;c__Alphaproteobacteria;o__Caulobacterales;f__Caulobacteraceae;g__;s__	0.295743	0.333748	0.00275373	0.00551008	0.00137039	0.00138072
OTU_1427	k__Bacteria;p__Firmicutes;c__Clostridia;o__Clostridiales;f__Clostridiaceae_1;g__Clostridium_sensu_stricto_11	0.295758	0.333737	0.00275886	0.00552108	0	0.0027555
OTU_1226	k__Bacteria;p__Chloroflexi;c__Ktedonobacteria;o__JG30-KF-AS9	0.295842	0.333674	0.00276068	0	0.00137157	0.00691047
OTU_1279	k__Bacteria;p__Chloroflexi;c__Ktedonobacteria;o__Ktedonobacterales;f__Ktedonobacteraceae;g__;s__	0.295849	0.333669	0.00276072	0.00137169	0	0.00691047
OTU_1673	k__Bacteria;p__Proteobacteria;c__Gammaproteobacteria	0.296072	0.333502	0.00274549	0.00412055	0.00411591	0
OTU_1277	k__Bacteria;p__Proteobacteria;c__Alphaproteobacteria;o__Rickettsiales;f__Rickettsiaceae	0.296236	0.333378	0.00412697	0.00689344	0.00548748	0
OTU_562	k__Bacteria;p__Proteobacteria;c__Gammaproteobacteria;o__Xanthomonadales;f__Solimonadaceae	0.29626	0.333361	0.00276033	0.0069106	0.00137039	0
OTU_294	k__Bacteria;p__Proteobacteria;c__Deltaproteobacteria;o__GR-WP33-30;f__unidentified_GR-WP33-30;g__unidentified_GR-WP33-30;s__bacterium_enrichment_culture_clone_B126.2011.	0.296563	0.333133	0.00276461	0.00138336	0	0.00691047
OTU_1454	k__Bacteria;p__Chloroflexi;c__Ktedonobacteria;o__JG30-KF-AS9;f__;g__;s__	0.296607	0.3331	0.00274732	0.00412605	0.0041159	0
OTU_312	k__Bacteria;p__Chloroflexi;c__Caldilineae;o__Caldilineales;f__Caldilineaceae;g__;s__	0.296764	0.332983	0.00276198	0.00552108	0	0.00276488
OTU_712	k__Bacteria;p__Proteobacteria;c__Betaproteobacteria;o__Burkholderiales;f__Alcaligenaceae	0.296881	0.332895	0.00962291	0.0192586	0.00822944	0.00138072
OTU_652	k__Bacteria;p__Actinobacteria;c__Thermoleophilia;o__Gaiellales;f__unidentified_Gaiellales;g__unidentified_Gaiellales;s__Gaiella_sp._EBR4-R2	0.29689	0.332889	0.00411685	0.00274337	0.00822944	0.00137775
OTU_1324	k__Bacteria;p__Proteobacteria;c__Betaproteobacteria	0.296929	0.332859	0.002751	0	0.00548985	0.00276316
OTU_297	k__Bacteria;p__Proteobacteria;c__Deltaproteobacteria;o__GR-WP33-30;f__unidentified_GR-WP33-30;g__unidentified_GR-WP33-30;s__bacterium_enrichment_culture_clone_B30.2011.	0.298399	0.33176	0.00274845	0	0.00548392	0.00276144
OTU_528	k__Bacteria;p__Proteobacteria;c__Alphaproteobacteria;o__Rhodobacterales;f__Rhodobacteraceae;g__Paracocccus	0.298512	0.331676	0.00275118	0	0.00548866	0.00276488
OTU_775	k__Bacteria;p__Cyanobacteria;c__unidentified_Cyanobacteria;o__SubsectionIV;f__FamilyI;g__Nostoc	0.300248	0.330383	0.0054989	0.00413222	0.00822826	0.00413622
OTU_336	k__Bacteria;p__Proteobacteria;c__Alphaproteobacteria;o__Rhizobiales	0.301476	0.329471	0.115915	0.115489	0.152238	0.0800175
OTU_183	k__Bacteria;p__Chloroflexi;c__Ktedonobacteria;o__JG30-KF-AS9;f__;g__;s__	0.304791	0.327022	0.396297	0.176595	0.440309	0.571986
OTU_1046	k__Bacteria;p__Proteobacteria;c__Alphaproteobacteria;o__Rhizobiales	0.305058	0.326826	0.00365951	0.00549224	0.0054863	0
OTU_1593	k__Bacteria;p__Firmicutes;c__Clostridia;o__Clostridiales;f__Ruminococcaceae;g__Ruminiclostridium_1	0.305693	0.326359	0.00367454	0.00550323	0	0.00552038
OTU_999	k__Bacteria;p__Verrucomicrobia;c__OPB35_soil_group	0.305806	0.326276	0.00872516	0	0.00685431	0.0193212
OTU_958	k__Bacteria;p__Bacteroidetes;c__Sphingobacteriia;o__Sphingobacteriales;f__Chitinophagaceae;g__;s__	0.305901	0.326206	0.00366951	0	0.00548392	0.0055246
OTU_920	k__Bacteria;p__Bacteroidetes;c__Sphingobacteriia;o__Sphingobacteriales;f__Chitinophagaceae;g__Flavisolibacter;s__	0.306377	0.325857	0.00594484	0	0.015079	0.0027555
OTU_1435	k__Bacteria;p__Firmicutes;c__Clostridia;o__Clostridiales;f__Gracilibacteraceae;g__Lutispora;s__	0.307224	0.325236	0.00366609	0.00686942	0.00137039	0.00275847
OTU_304	k__Bacteria;p__Proteobacteria;c__Betaproteobacteria;o__Burkholderiales;f__Burkholderiaceae;g__Burkholderia	0.307286	0.325191	0.08194	0.200446	0.0288137	0.0165602
OTU_1274	k__Bacteria;p__Chloroflexi;c__Ktedonobacteria;o__Ktedonobacterales	0.310447	0.322885	0.00781482	0.00137169	0.00548866	0.0165841
OTU_1316	k__Bacteria;p__Actinobacteria;c__unidentified_Actinobacteria;o__Streptosporangiales;f__Thermomonosporaceae;g__Actinoallomurus	0.311336	0.32224	0.0692253	0.07295	0.0822932	0.0524327
OTU_211	k__Bacteria;p__Proteobacteria;c__Alphaproteobacteria;o__Rhizobiales;f__Hyphomicrobiaceae;g__Rhodomicrobium;s__	0.311605	0.322044	0.153254	0.154197	0.126173	0.179392
OTU_679	k__Bacteria;p__Actinobacteria;c__Acidimicrobiia;o__Acidimicrobiales;f__;g__;s__	0.313292	0.320823	0.0192738	0.0137677	0.0178281	0.0262257
OTU_47	k__Bacteria;p__Proteobacteria;c__Alphaproteobacteria;o__Rhizobiales;f__Hyphomicrobiaceae;g__Hyphomicrobium;s__	0.313845	0.320423	0.0954592	0.110121	0.0671822	0.109075
OTU_358	k__Bacteria;p__Chloroflexi;c__Ktedonobacteria;o__Ktedonobacterales	0.314264	0.320121	0.0720331	0.0551496	0.0946492	0.0663005
OTU_1821	k__Bacteria;p__Chloroflexi;c__Ktedonobacteria;o__B12-WMSP1;f__;g__;s__	0.315432	0.31928	0.003202	0	0.00822825	0.00137775
OTU_673	k__Bacteria;p__Proteobacteria;c__Deltaproteobacteria;o__Myxococcales;f__Polyangiaceae;g__Sorangium;s__	0.318765	0.316891	0.0261534	0.0316504	0.0150849	0.0317248
OTU_214	k__Bacteria;p__Actinobacteria;c__Thermoleophilia;o__Solirubrobacterales;f__480-2;g__;s__	0.318832	0.316843	0.155051	0.194409	0.175564	0.0951813
OTU_1019	k__Bacteria;p__Acidobacteria;c__unidentified_Acidobacteria;o__Subgroup_4;f__11-24;g__;s__	0.318996	0.316726	0.0183505	0.0234038	0.0137157	0.017932
OTU_1004	k__Bacteria;p__Firmicutes;c__Clostridia;o__Clostridiales;f__Ruminococcaceae	0.321933	0.314635	0.0101019	0.0151627	0.00548985	0.00965317
OTU_5	k__Bacteria;p__Acidobacteria;c__unidentified_Acidobacteria;o__Subgroup_4;f__11-24;g__;s__	0.32414	0.313073	0.107843	0.147575	0.123433	0.0525194
OTU_685	k__Bacteria;p__Chloroflexi;c__Ktedonobacteria;o__JG30-KF-AS9;f__;g__;s__	0.324684	0.312688	0.0151498	0.0068701	0.0137145	0.0248647
OTU_912	k__Bacteria;p__Actinobacteria;c__unidentified_Actinobacteria;o__Pseudonocardiales;f__Pseudonocardiaceae	0.324775	0.312624	0.00641806	0.00138336	0.0109761	0.0068947
OTU_690	k__Bacteria;p__Acidobacteria;c__unidentified_Acidobacteria;o__Acidobacteriales;f__Acidobacteriaceae_.Subgroup_1.;g__Terriglobus;s__	0.32857	0.309958	0.0146792	0.0220541	0.0164601	0.00552335
OTU_841	k__Bacteria;p__Actinobacteria;c__unidentified_Actinobacteria;o__Streptosporangiales;f__Thermomonosporaceae;g__Actinomadura	0.329771	0.309117	0.00731801	0.00275437	0.0191997	0
OTU_162	k__Bacteria;p__Acidobacteria;c__unidentified_Acidobacteria;o__Subgroup_6;f__;g__;s__	0.330035	0.308933	0.00872907	0.00412673	0.00548155	0.0165789
OTU_216	k__Bacteria	0.332814	0.306999	0.00457995	0.00962514	0.00411472	0
OTU_195	k__Bacteria;p__Proteobacteria;c__Gammaproteobacteria;o__Xanthomonadales;f__Xanthomonadaceae	0.332915	0.306929	0.00871762	0.00553342	0.0150897	0.00552975
OTU_146	k__Bacteria;p__Proteobacteria;c__Alphaproteobacteria;o__Rhizobiales;f__Xanthobacteraceae;g__Labrys	0.333771	0.306336	0.106156	0.275907	0.0384159	0.00414559
OTU_393	k__Bacteria;p__Acidobacteria;c__unidentified_Acidobacteria;o__Acidobacteriales;f__Acidobacteriaceae_.Subgroup_1.	0.334701	0.305692	0.0384891	0.0618515	0.0356597	0.0179559
OTU_251	k__Bacteria;p__WD272;c__;o__;f__;g__;s__	0.33671	0.304305	0.114783	0.0882678	0.0918741	0.164208
OTU_658	k__Bacteria;p__Saccharibacteria;c__unidentified_Saccharibacteria;o__unidentified_Saccharibacteria;f__unidentified_Saccharibacteria;g__unidentified_Saccharibacteria	0.337282	0.303912	0.012841	0.0138102	0.02057	0.00414263
OTU_1689	k__Bacteria;p__Proteobacteria;c__Deltaproteobacteria;o__Oligoflexales;f__;g__;s__	0.33872	0.302924	0.00321467	0.00549841	0	0.00414559
OTU_451	k__Bacteria;p__Actinobacteria;c__Acidimicrobiia;o__Acidimicrobiales;f__;g__;s__	0.340907	0.301427	0.00412745	0.011012	0.00137039	0
OTU_234	k__Bacteria;p__Proteobacteria;c__Alphaproteobacteria;o__Rhodospirillales;f__Acetobacteraceae;g__Stella;s__	0.34403	0.2993	0.00412191	0.00413155	0.00823418	0
OTU_242	k__Bacteria;p__Bacteroidetes;c__Sphingobacteriia;o__Sphingobacteriales;f__Chitinophagaceae;g__Flavisolibacter	0.344532	0.29896	0.197753	0.224381	0.146742	0.222138
OTU_678	k__Bacteria;p__Acidobacteria;c__unidentified_Acidobacteria;o__Subgroup_3;f__unidentified_Acidobacteria;g__Bryobacter;s__	0.345745	0.298138	0.0128505	0.0207153	0.0164553	0.00138072
OTU_1236	k__Bacteria;p__Actinobacteria;c__unidentified_Actinobacteria;o__Micromonosporales;f__Micromonosporaceae	0.34642	0.297681	0.00365904	0.00274887	0.00822825	0
OTU_1438	k__Bacteria;p__Proteobacteria;c__Gammaproteobacteria;o__Xanthomonadales;f__unidentified_Xanthomonadales;g__Acidibacter;s__	0.347835	0.296726	0.0289191	0.0261753	0.0233215	0.0372605
OTU_692	k__Bacteria;p__Firmicutes;c__Clostridia;o__Clostridiales;f__Lachnospiraceae;g__Mobilitalea;s__	0.350226	0.295118	0.0348639	0.0468303	0.0301699	0.0275916
OTU_812	k__Bacteria;p__Chloroflexi;c__Ktedonobacteria;o__JG30-KF-AS9;f__;g__;s__	0.351604	0.294195	0.0146902	0.00549224	0.0150873	0.0234911
OTU_598	k__Bacteria;p__Proteobacteria;c__Deltaproteobacteria;o__Myxococcales;f__Polyangiaceae;g__Polyangium	0.352939	0.293303	0.0266485	0.0303391	0.010975	0.0386316
OTU_1125	k__Bacteria;p__Chloroflexi;c__Ktedonobacteria;o__Ktedonobacterales;f__HSB_OF53-F07;g__;s__	0.353952	0.292627	0.00505013	0.00828779	0.00686261	0
OTU_89	k__Bacteria;p__Proteobacteria;c__Alphaproteobacteria;o__Caulobacterales;f__Caulobacteraceae;g__;s__	0.355273	0.291749	0.458074	0.525952	0.493673	0.354596
OTU_1134	k__Bacteria;p__Proteobacteria;c__Betaproteobacteria;o__Burkholderiales;f__Comamonadaceae	0.356012	0.291258	0.00412303	0.00688042	0.00548866	0
OTU_1266	k__Bacteria;p__Firmicutes;c__Clostridia;o__Clostridiales;f__Clostridiaceae_1;g__Clostridium_sensu_stricto_6;s__	0.356532	0.290913	0.00414183	0.00690511	0	0.00552038
OTU_985	k__Bacteria;p__Chloroflexi;c__Ktedonobacteria;o__Ktedonobacterales	0.356717	0.29079	0.00962614	0.0123795	0.0109726	0.00552631
OTU_815	k__Bacteria;p__Proteobacteria;c__Alphaproteobacteria;o__Rhodospirillales;f__Acetobacteraceae;g__Rhodovastum;s__	0.359387	0.289025	0.00780795	0.00275437	0.00137157	0.0192979
OTU_772	k__Bacteria;p__Firmicutes;c__Bacilli;o__Bacillales;f__Paenibacillaceae;g__Paenibacillus;s__Paenibacillus_massiliensis	0.360343	0.288395	0.00826504	0.0151559	0.0041159	0.00552335
OTU_870	k__Bacteria;p__Proteobacteria;c__Alphaproteobacteria;o__Rhodospirillales;f__Rhodospirillaceae;g__Inquilinus;s__	0.360527	0.288274	0.014677	0.00825278	0.0164565	0.0193216
OTU_140	k__Bacteria;p__Bacteroidetes;c__Sphingobacteriia;o__Sphingobacteriales;f__Chitinophagaceae	0.365924	0.284741	0.0045897	0.00827544	0.0041159	0.00137775
OTU_1535	k__Bacteria;p__Firmicutes;c__Clostridia;o__Clostridiales;f__Peptostreptococcaceae;g__Terrisporobacter;s__	0.371198	0.281321	0.00965746	0.0151922	0.00411591	0.00966426
OTU_346	k__Bacteria;p__Chloroflexi;c__Ktedonobacteria;o__Ktedonobacterales	0.371347	0.281225	0.0660658	0.0358375	0.0946611	0.0676988
OTU_581	k__Bacteria;p__Actinobacteria;c__Thermoleophilia;o__Gaiellales;f__;g__;s__	0.373433	0.279881	0.0426291	0.0302629	0.0548594	0.0427651
OTU_1311	k__Bacteria;p__Firmicutes;c__Bacilli;o__Bacillales;f__Alicyclobacillaceae;g__Alicyclobacillus	0.373702	0.279708	0.00321023	0.00549774	0.00137276	0.00276019
OTU_1367	k__Bacteria;p__Proteobacteria;c__Deltaproteobacteria;o__Myxococcales;f__Haliangiaceae;g__Haliangium;s__	0.374761	0.279029	0.00504475	0.00688659	0.00548748	0.00276019
OTU_296	k__Bacteria;p__Proteobacteria;c__Alphaproteobacteria;o__Rhodospirillales;f__Acetobacteraceae	0.375036	0.278852	0.0784421	0.0936269	0.0699502	0.071749
OTU_1	k__Bacteria;p__Proteobacteria;c__Alphaproteobacteria;o__Sphingomonadales	0.376881	0.277671	0.181956	0.039864	0.148058	0.357945
OTU_922	k__Bacteria;p__Chloroflexi;c__Ktedonobacteria;o__JG30-KF-AS9;f__;g__;s__	0.377256	0.277432	0.0133181	0.00551008	0.0123442	0.0221001
OTU_221	k__Bacteria;p__Proteobacteria;c__Alphaproteobacteria;o__Sphingomonadales;f__Sphingomonadaceae;g__Sphingobium;s__Sphingobium_fuliginis	0.38026	0.275519	0.00919045	0.0179281	0.00411353	0.00552975
OTU_1050	k__Bacteria;p__Acidobacteria;c__unidentified_Acidobacteria;o__Acidobacteriales;f__Acidobacteriaceae_.Subgroup_1.;g__Edaphobacter;s__	0.381931	0.274459	0.213211	0.187278	0.261929	0.190426
OTU_866	k__Bacteria;p__Firmicutes;c__Erysipelotrichia;o__Erysipelotrichales;f__Erysipelotrichaceae;g__Asteroleplasma;s__	0.382287	0.274234	0.00869497	0.00826512	0.0178198	0
OTU_1271	k__Bacteria;p__Bacteroidetes;c__Sphingobacteriia;o__Sphingobacteriales;f__Chitinophagaceae	0.384844	0.27262	0.00412088	0	0.0082247	0.00413794
OTU_1378	k__Bacteria;p__Firmicutes;c__Clostridia;o__Clostridiales;f__Clostridiaceae_1;g__Fonticella;s__	0.385527	0.27219	0.00459655	0.00826927	0	0.00552038
OTU_1280	k__Bacteria;p__Firmicutes;c__Clostridia;o__Clostridiales;f__Ruminococcaceae;g__Ruminiclostridium_1;s__	0.386621	0.271502	0.00460478	0.00829396	0	0.00552038
OTU_947	k__Bacteria;p__Proteobacteria;c__Deltaproteobacteria;o__Myxococcales;f__Cystobacteraceae;g__Anaeromyxobacter;s__	0.386728	0.271435	0.00965263	0.00413772	0.00411828	0.0207019
OTU_1395	k__Bacteria;p__Firmicutes;c__Clostridia;o__Clostridiales;f__Ruminococcaceae	0.38796	0.270662	0.00964076	0.0151812	0.00822707	0.00551398
OTU_107	k__Bacteria;p__Proteobacteria;c__Alphaproteobacteria;o__Rhizobiales	0.388765	0.270158	0.0146993	0.0303289	0.00685668	0.00691219
OTU_1160	k__Bacteria;p__Chloroflexi;c__Ktedonobacteria;o__JG30-KF-AS9	0.388926	0.270057	0.00873657	0.00415007	0.00686142	0.0151982
OTU_943	k__Bacteria;p__Proteobacteria;c__Alphaproteobacteria;o__Rhodospirillales;f__Acetobacteraceae	0.389955	0.269414	0.00689431	0.00551008	0.00137157	0.0138013
OTU_258	k__Bacteria;p__Bacteroidetes;c__Sphingobacteriia;o__Sphingobacteriales;f__Sphingobacteriaceae;g__Mucilaginibacter	0.389981	0.269398	0.101186	0.0865212	0.167388	0.0496501
OTU_798	k__Bacteria;p__Proteobacteria;c__Alphaproteobacteria;o__Rhizobiales;f__alphaI_cluster;g__;s__	0.391357	0.268539	0.0160609	0.0192833	0.0137181	0.0151812
OTU_379	k__Bacteria;p__Chloroflexi;c__Ktedonobacteria;o__JG30-KF-AS9;f__;g__;s__	0.391364	0.268535	0.0330479	0.0179246	0.0411508	0.0400684
OTU_199	k__Bacteria;p__Gemmatimonadetes;c__unidentified_Gemmatimonadetes;o__Gemmatimonadales;f__Gemmatimonadaceae;g__Gemmatimonas;s__Microcystis_sp._SAG_43.90	0.392058	0.268103	0.0114999	0.0165632	0.00274078	0.0151957
OTU_1502	k__Bacteria;p__Firmicutes;c__Clostridia;o__Clostridiales;f__Ruminococcaceae	0.393631	0.267125	0.0027568	0.0055149	0	0.0027555
OTU_1028	k__Bacteria;p__Saccharibacteria;c__;o__;f__;g__;s__	0.393945	0.26693	0.00552273	0	0.00274552	0.0138227
OTU_1032	k__Bacteria;p__Actinobacteria;c__Acidimicrobiia;o__Acidimicrobiales	0.394378	0.266662	0.00274958	0.00550323	0.00274552	0
OTU_1496	k__Bacteria;p__Firmicutes;c__Clostridia;o__Clostridiales;f__Lachnospiraceae;g__Epulopiscium;s__	0.394411	0.266641	0.00275993	0.0055149	0	0.00276488
OTU_299	k__Bacteria;p__Proteobacteria;c__Betaproteobacteria;o__TRA3-20;f__;g__;s__	0.394411	0.266641	0.00275993	0.0055149	0	0.00276488
OTU_1433	k__Bacteria;p__Proteobacteria;c__Deltaproteobacteria;o__Bdellovibrionales;f__Bdellovibrionaceae;g__Bdellovibrio;s__	0.394527	0.26657	0.00367511	0.00690443	0.00274315	0.00137775
OTU_1108	k__Bacteria;p__Proteobacteria;c__Deltaproteobacteria;o__Bdellovibrionales;f__Bdellovibrionaceae;g__Bdellovibrio;s__	0.394906	0.266335	0.00781701	0.00691678	0.00274315	0.0137911
OTU_1649	k__Bacteria;p__Proteobacteria;c__Deltaproteobacteria;o__Myxococcales;f__mle1-27;g__;s__	0.39499	0.266283	0.00366775	0.00688177	0.00274078	0.00138072
OTU_51	k__Bacteria;p__Cyanobacteria;c__Melainabacteria;o__Obscuribacterales;f__;g__;s__	0.395088	0.266222	0.0151704	0.00276054	0.0109631	0.0317875
OTU_1509	k__Bacteria;p__Planctomycetes;c__Phycisphaerae;o__WD2101_soil_group;f__;g__;s__	0.396306	0.265469	0.00275118	0	0.00548867	0.00276488
OTU_1536	k__Bacteria;p__Chloroflexi;c__TK10;o__unidentified_TK10;f__unidentified_TK10;g__unidentified_TK10	0.396621	0.265274	0.00367865	0.00276671	0.00137157	0.00689766
OTU_1257	k__Bacteria;p__Firmicutes;c__Bacilli;o__Bacillales;f__Paenibacillaceae;g__Paenibacillus;s__Paenibacillus_telluris	0.398454	0.264144	0.00412562	0.00137169	0.00685787	0.00414731
OTU_800	k__Bacteria;p__Chloroflexi;c__Ktedonobacteria	0.404474	0.260457	0.0174424	0.00826512	0.0191973	0.0248647
OTU_8	k__Bacteria;p__Chloroflexi;c__Ktedonobacteria;o__JG30-KF-AS9;f__;g__;s__	0.406316	0.259336	2.80335	1.81139	3.57999	3.01868
OTU_153	k__Bacteria;p__Elusimicrobia;c__unidentified_Elusimicrobia;o__Lineage_IV;f__;g__;s__	0.407744	0.258469	0.00966272	0.0179528	0.00274078	0.00829463
OTU_1292	k__Bacteria;p__Proteobacteria;c__Alphaproteobacteria;o__Caulobacterales;f__Caulobacteraceae;g__;s__	0.409574	0.257361	0.0335038	0.0275415	0.0219392	0.0510307
OTU_363	k__Bacteria;p__Actinobacteria;c__Thermoleophilia;o__Gaiellales;f__;g__;s__	0.413055	0.255264	0.087579	0.0647027	0.104227	0.0938077
OTU_236	k__Bacteria;p__Firmicutes;c__Clostridia;o__Clostridiales;f__Clostridiaceae_1;g__Clostridium_sensu_stricto_1	0.414373	0.254472	0.157182	0.183274	0.0616995	0.226572
OTU_35	k__Bacteria;p__Proteobacteria;c__Alphaproteobacteria;o__Caulobacterales;f__Caulobacteraceae;g__Caulobacter;s__Caulobacter_sp.	0.414441	0.254432	0.0269976	0.0576506	0.0205772	0.00276488
OTU_6	k__Bacteria;p__Proteobacteria;c__Betaproteobacteria;o__Methylophilales;f__Methylophilaceae;g__;s__	0.415995	0.253501	0.0560799	0.00688659	0.041114	0.120239
OTU_197	k__Bacteria;p__Proteobacteria;c__Alphaproteobacteria;o__Rhodospirillales;f__DA111;g__;s__	0.417081	0.252852	0.346379	0.334477	0.28934	0.415318
OTU_272	k__Bacteria;p__Cyanobacteria;c__Melainabacteria;o__Vampirovibrionales;f__;g__;s__	0.419723	0.251278	0.00229546	0	0.00274078	0.00414559
OTU_574	k__Bacteria;p__Thermomicrobia;c__unidentified_Thermomicrobia;o__JG30-KF-CM45;f__;g__;s__	0.419955	0.251139	0.00229362	0.00413772	0.00274315	0
OTU_1069	k__Bacteria;p__Chloroflexi;c__Ktedonobacteria;o__Ktedonobacterales;f__HSB_OF53-F07;g__;s__	0.420493	0.25082	0.00826644	0.00413772	0.00822825	0.0124333
OTU_1569	k__Bacteria;p__Proteobacteria;c__Alphaproteobacteria;o__Rhodospirillales;f__DA111;g__;s__	0.420546	0.250789	0.0119414	0.011014	0.00411117	0.0206989
OTU_173	k__Bacteria;p__Chloroflexi;c__Ktedonobacteria;o__Ktedonobacterales	0.420803	0.250636	0.170233	0.147536	0.200275	0.16289
OTU_1542	k__Bacteria;p__Gemmatimonadetes;c__unidentified_Gemmatimonadetes;o__Gemmatimonadales;f__Gemmatimonadaceae	0.420894	0.250582	0.00228711	0.00412055	0.00274078	0
OTU_771	k__Bacteria;p__Actinobacteria;c__Thermoleophilia;o__Gaiellales	0.421683	0.250114	0.0155762	0.0219868	0.0164601	0.00828182
OTU_1625	k__Bacteria;p__Bacteroidetes;c__Sphingobacteriia;o__Sphingobacteriales;f__env.OPS_17;g__;s__	0.421819	0.250033	0.00228682	0.00274337	0.00411709	0
OTU_1777	k__Bacteria;p__Proteobacteria;c__Deltaproteobacteria;o__Myxococcales;f__mle1-27;g__;s__	0.422053	0.249894	0.00228564	0.00274337	0.00411353	0
OTU_1385	k__Bacteria;p__Firmicutes;c__Bacilli;o__Bacillales;f__Bacillaceae;g__unidentified_Bacillaceae;s__Geomicrobium_sp._JCM_19038	0.422709	0.249506	0.00229385	0.00412605	0	0.0027555
OTU_154	k__Bacteria;p__Chloroflexi;c__Ktedonobacteria;o__JG30-KF-AS9;f__;g__;s__	0.425765	0.247702	0.298242	0.205577	0.230448	0.458702
OTU_663	k__Bacteria;p__Elusimicrobia;c__unidentified_Elusimicrobia;o__Lineage_IIa;f__;g__;s__	0.426004	0.247561	0.0137952	0.0110607	0.00548985	0.0248351
OTU_181	k__Bacteria;p__Proteobacteria;c__Deltaproteobacteria;o__Bdellovibrionales;f__Bdellovibrionaceae;g__;s__	0.426552	0.247239	0.00919721	0.0165756	0.00548629	0.00552975
OTU_565	k__Bacteria;p__Chloroflexi;c__Ktedonobacteria;o__Ktedonobacterales;f__Ktedonobacteraceae;g__;s__	0.429609	0.245445	0.0541792	0.0220678	0.0603338	0.0801361
OTU_521	k__Bacteria;p__Actinobacteria;c__Acidimicrobiia;o__Acidimicrobiales;f__;g__;s__	0.432475	0.24377	0.00869869	0.00413155	0.0191997	0.00276488
OTU_385	k__Bacteria;p__Proteobacteria;c__Betaproteobacteria;o__Burkholderiales;f__Burkholderiaceae;g__Cupriavidus;s__Cupriavidus_taiwanensis	0.43276	0.243604	0.00597794	0	0.00411117	0.0138227
OTU_608	k__Bacteria;p__Chloroflexi;c__Ktedonobacteria;o__Ktedonobacterales	0.435241	0.242162	0.0206408	0.0302622	0.0137252	0.017935
OTU_1133	k__Bacteria;p__Firmicutes;c__Clostridia;o__Clostridiales;f__9B-04;g__;s__	0.437612	0.240788	0.00505045	0.00138336	0.00548274	0.00828525
OTU_582	k__Bacteria;p__Proteobacteria;c__Alphaproteobacteria;o__Sphingomonadales;f__Sphingomonadaceae;g__Novosphingobium;s__	0.437689	0.240743	0.0192483	0.00963613	0.0356668	0.0124419
OTU_665	k__Bacteria;p__Acidobacteria;c__unidentified_Acidobacteria;o__Acidobacteriales;f__Acidobacteriaceae_.Subgroup_1.;g__Candidatus_Koribacter;s__	0.439227	0.239855	0.0683526	0.0618797	0.0521269	0.0910511
OTU_862	k__Bacteria;p__Proteobacteria;c__Deltaproteobacteria;o__Bdellovibrionales;f__Bdellovibrionaceae;g__Bdellovibrio;s__	0.439716	0.239573	0.0100983	0.0110188	0.00548511	0.0137911
OTU_968	k__Bacteria;p__Proteobacteria;c__Deltaproteobacteria;o__Myxococcales;f__mle1-27;g__;s__	0.440015	0.239401	0.00642725	0.00274337	0.00548748	0.0110509
OTU_62	k__Bacteria;p__Cyanobacteria;c__Melainabacteria;o__Obscuribacterales;f__;g__;s__	0.441827	0.238358	0.013771	0.0206893	0.0137134	0.00691047
OTU_305	k__Bacteria;p__Actinobacteria;c__unidentified_Actinobacteria;o__Streptosporangiales;f__Thermomonosporaceae;g__Actinomadura	0.442501	0.237971	0.0627584	0.0991007	0.0767548	0.0124198
OTU_458	k__Bacteria;p__Proteobacteria;c__Alphaproteobacteria;o__Rhodospirillales;f__DA111;g__;s__	0.442548	0.237944	0.0720272	0.0839455	0.0507494	0.0813867
OTU_687	k__Bacteria;p__Bacteroidetes;c__Sphingobacteriia;o__Sphingobacteriales;f__Chitinophagaceae;g__;s__	0.444454	0.236852	0.0100864	0.0068701	0.0123442	0.011045
OTU_1052	k__Bacteria;p__Chloroflexi;c__Ktedonobacteria;o__Ktedonobacterales;f__Thermosporotrichaceae;g__Thermosporothrix;s__	0.446079	0.235923	0.00732999	0	0.0137145	0.00827542
OTU_69	k__Bacteria;p__Chloroflexi;c__Ktedonobacteria;o__JG30-KF-AS9;f__;g__;s__	0.446785	0.23552	0.814844	0.504595	0.740714	1.19922
OTU_492	k__Bacteria;p__Chloroflexi;c__Ktedonobacteria;o__JG30-KF-AS9;f__;g__;s__	0.448406	0.234596	0.030314	0.0193189	0.0301841	0.0414389
OTU_728	k__Bacteria;p__Chloroflexi;c__TK10;o__;f__;g__;s__	0.449611	0.233912	0.00413065	0.00826927	0.00274196	0.00138072
OTU_1380	k__Bacteria;p__Firmicutes;c__Bacilli;o__Bacillales;f__Paenibacillaceae;g__Paenibacillus	0.454513	0.231137	0.00641432	0.00688109	0.00960338	0.00275847
OTU_457	k__Bacteria;p__Proteobacteria;c__Gammaproteobacteria;o__Xanthomonadales;f__Xanthomonadaceae;g__Panacagrimonas;s__	0.461691	0.227111	0.00367465	0.00412605	0.00137157	0.00552631
OTU_1645	k__Bacteria;p__Firmicutes;c__Negativicutes;o__Selenomonadales;f__Veillonellaceae;g__Sporomusa;s__	0.462004	0.226936	0.00917225	0.0137745	0.00822825	0.00551398
OTU_53	k__Bacteria;p__Acidobacteria;c__unidentified_Acidobacteria;o__Subgroup_4;f__unidentified_Acidobacteria;g__Blastocatella;s__Acidobacteriaceae_bacterium_WY18	0.462875	0.226451	0.00917781	0	0.0123335	0.0151999
OTU_977	k__Bacteria;p__Chloroflexi;c__Ktedonobacteria;o__Ktedonobacterales	0.464051	0.225796	0.00872928	0.00827062	0.00548511	0.0124321
OTU_1632	k__Bacteria;p__Chloroflexi;c__JG30-KF-CM66;o__;f__;g__;s__	0.466713	0.224318	0.00459251	0.00138336	0.00411828	0.00827588
OTU_1317	k__Bacteria;p__Proteobacteria;c__Deltaproteobacteria;o__Oligoflexales;f__;g__;s__	0.468029	0.22359	0.00459427	0.00827679	0.00137276	0.00413326
OTU_182	k__Bacteria;p__Actinobacteria;c__Acidimicrobiia;o__Acidimicrobiales;f__;g__;s__	0.471892	0.22146	0.0096599	0.00274887	0.00411354	0.0221173
OTU_7	k__Bacteria;p__Bacteroidetes;c__Sphingobacteriia;o__Sphingobacteriales;f__Chitinophagaceae;g__Niastella;s__	0.472014	0.221393	0.00731814	0.00137169	0.019202	0.00138072
OTU_668	k__Bacteria;p__Firmicutes;c__Clostridia;o__Clostridiales;f__Clostridiaceae_1;g__Fonticella;s__	0.474504	0.220026	0.0188023	0.0275409	0.0150826	0.0137835
OTU_1421	k__Bacteria;p__Firmicutes;c__Clostridia;o__Clostridiales;f__Family_XIII;g__;s__	0.475146	0.219675	0.00596075	0.00963546	0.00411354	0.00413326
OTU_198	k__Bacteria;p__Chloroflexi;c__Ktedonobacteria;o__JG30-KF-AS9;f__;g__;s__	0.475402	0.219535	0.135871	0.0855004	0.164611	0.1575
OTU_915	k__Bacteria;p__Proteobacteria;c__Alphaproteobacteria;o__Rhodospirillales;f__Acetobacteraceae	0.478012	0.218109	0.144965	0.156852	0.109713	0.168332
OTU_480	k__Bacteria;p__Proteobacteria;c__Alphaproteobacteria;o__Rhodospirillales;f__Acetobacteraceae	0.481544	0.216188	0.0247729	0.026141	0.0178305	0.0303471
OTU_285	k__Bacteria;p__Chloroflexi;c__Ktedonobacteria;o__JG30-KF-AS9	0.482001	0.21594	0.0785365	0.0592441	0.0658403	0.110525
OTU_711	k__Bacteria;p__Proteobacteria;c__Deltaproteobacteria;o__Myxococcales;f__;g__;s__	0.483749	0.214993	0.0146901	0.0165282	0.00685786	0.0206841
OTU_683	k__Bacteria;p__Chloroflexi;c__Ktedonobacteria;o__Ktedonobacterales;f__Ktedonobacteraceae;g__;s__	0.484663	0.214499	0.0325882	0.0220321	0.0342905	0.0414419
OTU_179	k__Bacteria;p__Actinobacteria;c__unidentified_Actinobacteria;o__Frankiales;f__Sporichthyaceae;g__Sporichthya	0.485687	0.213946	0.00917708	0.0124028	0.00959864	0.00552975
OTU_257	k__Bacteria;p__Proteobacteria;c__Alphaproteobacteria;o__Rhizobiales;f__Phyllobacteriaceae;g__Mesorhizobium;s__Mesorhizobium_plurifarium	0.485709	0.213935	0.136224	0.14605	0.157737	0.104884
OTU_725	k__Bacteria;p__Firmicutes;c__Clostridia;o__Clostridiales	0.486073	0.213738	0.0123918	0.0165399	0.00960101	0.0110344
OTU_1717	k__Bacteria;p__Firmicutes;c__Bacilli;o__Bacillales;f__Paenibacillaceae;g__Paenibacillus	0.486463	0.213528	0.00321097	0.00552175	0.00411117	0
OTU_1363	k__Bacteria;p__Gemmatimonadetes;c__unidentified_Gemmatimonadetes;o__Gemmatimonadales;f__Gemmatimonadaceae;g__Gemmatimonas	0.48723	0.213115	0.00412731	0.00137169	0.00274078	0.00826948
OTU_534	k__Bacteria;p__Proteobacteria;c__SPOTSOCT00m83;o__;f__;g__;s__	0.487242	0.213108	0.00320049	0.00548674	0.00411472	0
OTU_1469	k__Bacteria;p__Firmicutes;c__Bacilli;o__Bacillales;f__Paenibacillaceae	0.487585	0.212924	0.0032085	0.00549224	0	0.00413326
OTU_1523	k__Bacteria;p__Proteobacteria;c__Alphaproteobacteria;o__Rhodospirillales;f__unidentified_Rhodospirillales;g__Candidatus_Alysiosphaera;s__	0.488859	0.212239	0.00229715	0.00137718	0.00137039	0.00414388
OTU_980	k__Bacteria;p__Proteobacteria;c__Alphaproteobacteria;o__Rhodospirillales;f__Acetobacteraceae	0.489478	0.211906	0.00503496	0.00274337	0.00822826	0.00413326
OTU_1314	k__Bacteria;p__Verrucomicrobia;c__Spartobacteria;o__Chthoniobacterales;f__Chthoniobacteraceae;g__Chthoniobacter;s__	0.490001	0.211626	0.00229628	0.00413772	0.00137039	0.00138072
OTU_129	k__Bacteria;p__Proteobacteria;c__Deltaproteobacteria;o__Myxococcales;f__Blfdi19;g__;s__	0.490468	0.211376	0.0169965	0.0248393	0.0137134	0.0124368
OTU_1398	k__Bacteria;p__Acidobacteria;c__unidentified_Acidobacteria;o__Subgroup_3;f__unidentified_Acidobacteria;g__Bryobacter;s__	0.491024	0.211078	0.00183395	0.00274337	0	0.00275847
OTU_1607	k__Bacteria;p__Firmicutes;c__Erysipelotrichia;o__Erysipelotrichales;f__Erysipelotrichaceae;g__Turicibacter;s__	0.491776	0.210675	0.00183761	0.00275437	0	0.00275847
OTU_1634	k__Bacteria;p__Chloroflexi;c__Ktedonobacteria;o__JG30-KF-AS9	0.492294	0.210398	0.00184329	0.00276671	0	0.00276316
OTU_1315	k__Bacteria	0.493121	0.209956	0.00228884	0.00137169	0.00411709	0.00137775
OTU_1313	k__Bacteria;p__Firmicutes;c__Clostridia;o__Clostridiales;f__Ruminococcaceae	0.493223	0.209902	0.00229335	0.00412605	0.00137157	0.00138244
OTU_376	k__Bacteria;p__Cyanobacteria;c__ML635J-21;o__;f__;g__;s__	0.493433	0.20979	0.0018364	0	0.00274433	0.00276488
OTU_1123	k__Bacteria	0.493994	0.20949	0.00228944	0.00137169	0.00411591	0.00138072
OTU_1058	k__Bacteria;p__Chloroflexi;c__Ktedonobacteria;o__JG30-KF-AS9;f__unidentified_JG30-KF-AS9;g__unidentified_JG30-KF-AS9;s__Chloroflexi_bacterium_Ellin7237	0.494346	0.209302	0.0202024	0.00688659	0.0233167	0.0304038
OTU_1601	k__Bacteria;p__Acidobacteria;c__unidentified_Acidobacteria;o__Subgroup_5;f__;g__;s__	0.494847	0.209036	0.00229166	0.00137718	0.00411709	0.00138072
OTU_15	k__Bacteria;p__Proteobacteria;c__Gammaproteobacteria;o__Xanthomonadales;f__Solimonadaceae;g__Polycyclovorans;s__	0.4953	0.208794	0.0768399	0.109114	0.0260504	0.0953555
OTU_1241	k__Bacteria;p__Planctomycetes;c__Phycisphaerae;o__WD2101_soil_group;f__;g__;s__	0.496105	0.208366	0.00229372	0.00138336	0.00411709	0.00138072
OTU_1035	k__Bacteria;p__Gemmatimonadetes;c__unidentified_Gemmatimonadetes;o__Gemmatimonadales;f__Gemmatimonadaceae;g__unidentified_Gemmatimonadetes;s__Gemmatimonadetes_bacterium_KBS708	0.498218	0.207244	0.00504827	0.00275504	0.00548867	0.0069011
OTU_1323	k__Bacteria;p__Chloroflexi;c__TK10	0.498521	0.207083	0.00321	0.00137169	0.00274433	0.00551398
OTU_445	k__Bacteria;p__Actinobacteria;c__Acidimicrobiia;o__Acidimicrobiales;f__;g__;s__	0.500394	0.206091	0.00411863	0	0.00959272	0.00276316
OTU_1169	k__Bacteria;p__Acidobacteria;c__unidentified_Acidobacteria;o__Subgroup_6;f__;g__;s__	0.505263	0.203524	0.00596213	0.00275437	0.00685787	0.00827417
OTU_467	k__Bacteria;p__Acidobacteria;c__unidentified_Acidobacteria;o__Acidobacteriales;f__Acidobacteriaceae_.Subgroup_1.;g__Telmatobacter;s__	0.509607	0.201248	0.0967897	0.0812083	0.102867	0.106294
OTU_367	k__Bacteria;p__Chloroflexi;c__TK10;o__;f__;g__;s__	0.512356	0.199815	0.00276374	0.00414389	0	0.00414731
OTU_910	k__Bacteria;p__Actinobacteria;c__unidentified_Actinobacteria;o__Frankiales;f__Nakamurellaceae;g__Nakamurella;s__	0.512784	0.199592	0.00275596	0.00412055	0	0.00414731
OTU_25	k__Bacteria;p__Proteobacteria;c__Alphaproteobacteria;o__Rhizobiales;f__unidentified_Rhizobiales;g__Nordella	0.512828	0.199569	0.0560087	0.0716305	0.0425117	0.0538838
OTU_1335	k__Bacteria;p__Planctomycetes;c__Phycisphaerae;o__WD2101_soil_group;f__;g__;s__	0.512925	0.199519	0.00275269	0	0.0041159	0.00414216
OTU_745	k__Bacteria;p__Saccharibacteria;c__;o__;f__;g__;s__	0.514083	0.198917	0.00687944	0.00276054	0.010975	0.00690282
OTU_838	k__Bacteria;p__Proteobacteria;c__Deltaproteobacteria;o__Myxococcales;f__Haliangiaceae;g__Haliangium	0.518677	0.196538	0.0151321	0.00826995	0.0192032	0.0179231
OTU_1078	k__Bacteria;p__Acidobacteria;c__unidentified_Acidobacteria;o__Acidobacteriales;f__Acidobacteriaceae_.Subgroup_1.	0.519502	0.196112	0.00505727	0.00412605	0	0.0110458
OTU_1095	k__Bacteria;p__Proteobacteria;c__Alphaproteobacteria;o__Rhodospirillales;f__Acetobacteraceae	0.522423	0.194608	0.00458112	0.00688109	0.00548155	0.00138072
OTU_275	k__Bacteria;p__Proteobacteria;c__Alphaproteobacteria;o__Rhodospirillales;f__Rhodospirillaceae;g__Azospirillum;s__Azospirillum_sp._taihu16	0.525736	0.192909	0.00598638	0.0138336	0.00274315	0.00138244
OTU_1629	k__Bacteria;p__Firmicutes;c__Bacilli;o__Bacillales;f__Paenibacillaceae;g__Paenibacillus	0.527315	0.192102	0.00870658	0.00963613	0.0109726	0.00551101
OTU_567	k__Bacteria;p__Actinobacteria;c__Acidimicrobiia;o__Acidimicrobiales;f__Iamiaceae;g__Iamia;s__	0.528033	0.191735	0.00457138	0.0096018	0.00411235	0
OTU_1587	k__Bacteria;p__Proteobacteria;c__Betaproteobacteria;o__Nitrosomonadales;f__Nitrosomonadaceae;g__;s__	0.528886	0.1913	0.00412683	0.00137169	0.00411709	0.00689173
OTU_890	k__Bacteria;p__Firmicutes;c__Erysipelotrichia;o__Erysipelotrichales;f__Erysipelotrichaceae;g__Asteroleplasma;s__	0.529079	0.191202	0.0174243	0.0207503	0.0315225	0
OTU_1347	k__Bacteria;p__Chloroflexi;c__Ktedonobacteria;o__Ktedonobacterales;f__FCPS473;g__;s__	0.532842	0.189289	0.00229263	0	0.00411472	0.00276316
OTU_1331	k__Bacteria;p__Armatimonadetes;c__;o__;f__;g__;s__	0.532893	0.189263	0.00229294	0.00276054	0.00411828	0
OTU_441	k__Bacteria;p__Proteobacteria;c__Gammaproteobacteria;o__Pseudomonadales;f__Pseudomonadaceae;g__Pseudomonas;s__Pseudomonas_psychrotolerans	0.532984	0.189217	0.00228786	0.00274887	0.00411472	0
OTU_1838	k__Bacteria;p__Chloroflexi;c__Ktedonobacteria;o__Ktedonobacterales	0.533131	0.189142	0.00229196	0.00413155	0.00274433	0
OTU_1618	k__Bacteria;p__Bacteroidetes;c__Sphingobacteriia;o__Sphingobacteriales;f__Chitinophagaceae;g__Flavisolibacter;s__	0.533163	0.189126	0.00229174	0	0.00274196	0.00413326
OTU_245	k__Bacteria;p__Actinobacteria;c__unidentified_Actinobacteria;o__Micrococcales;f__Microbacteriaceae;g__Microbacterium;s__Microbacterium_flavescens	0.533616	0.188897	0.0165602	0.0276362	0.00823418	0.0138103
OTU_776	k__Bacteria;p__Proteobacteria;c__Gammaproteobacteria;o__Xanthomonadales;f__Xanthomonadaceae;g__Stenotrophomonas	0.535377	0.188005	0.00366619	0.00550873	0.00548985	0
OTU_124	k__Bacteria;p__Cyanobacteria;c__unidentified_Cyanobacteria;o__SubsectionIII;f__FamilyI;g__Leptolyngbya;s__Leptolyngbya_boryana	0.535814	0.187784	0.00550632	0.00691678	0.0096022	0
OTU_881	k__Bacteria;p__Chloroflexi;c__Ktedonobacteria;o__Ktedonobacterales;f__Thermosporotrichaceae;g__Thermosporothrix;s__	0.538652	0.186353	0.0169744	0.0110318	0.0246966	0.0151948
OTU_1401	k__Bacteria;p__Proteobacteria;c__Deltaproteobacteria;o__Myxococcales;f__Haliangiaceae;g__Haliangium;s__	0.539628	0.185862	0.00321078	0.00548674	0	0.00414559
OTU_1201	k__Bacteria;p__Chloroflexi;c__Ktedonobacteria;o__Ktedonobacterales;f__FCPS473;g__;s__	0.541811	0.184766	0.00367306	0.00275504	0.00274078	0.00552335
OTU_49	k__Bacteria;p__Proteobacteria;c__Alphaproteobacteria;o__Caulobacterales;f__Caulobacteraceae;g__Phenylobacterium;s__	0.547767	0.181789	1.18007	1.17056	1.04906	1.32058
OTU_906	k__Bacteria;p__Planctomycetes;c__Phycisphaerae;o__WD2101_soil_group;f__;g__;s__	0.553582	0.178904	0.0132997	0.00689209	0.0205772	0.0124299
OTU_955	k__Bacteria;p__Proteobacteria;c__Deltaproteobacteria;o__Myxococcales;f__Polyangiaceae;g__Polyangium;s__	0.55563	0.177892	0.0302556	0.0398936	0.0301734	0.0206999
OTU_930	k__Bacteria;p__Chloroflexi;c__SHA-26;o__;f__;g__;s__	0.559481	0.175998	0.00367403	0.00413772	0.00137039	0.00551398
OTU_1869	k__Bacteria;p__Firmicutes;c__Bacilli;o__Bacillales;f__Paenibacillaceae;g__Aneurinibacillus	0.560641	0.175429	0.00366828	0.00550941	0.00411472	0.00138072
OTU_1558	k__Bacteria;p__Firmicutes;c__Bacilli;o__Bacillales;f__Alicyclobacillaceae;g__Tumebacillus;s__	0.560769	0.175366	0.00366668	0.00549224	0.00137157	0.00413622
OTU_266	k__Bacteria;p__Proteobacteria;c__Alphaproteobacteria;o__Rhizobiales;f__Aurantimonadaceae;g__Aureimonas;s__	0.561462	0.175026	0.012857	0.0206763	0.00685431	0.0110403
OTU_1356	k__Bacteria;p__Proteobacteria;c__Deltaproteobacteria;o__Oligoflexales;f__;g__;s__	0.562717	0.174412	0.00458585	0.0068756	0.00411709	0.00276488
OTU_143	k__Bacteria;p__Verrucomicrobia;c__OPB35_soil_group	0.564864	0.173363	0.00551125	0	0.00685668	0.00967706
OTU_1506	k__Bacteria;p__Proteobacteria;c__Deltaproteobacteria;o__Oligoflexales	0.569985	0.170873	0.00457678	0.00686393	0.00548867	0.00137775
OTU_1090	k__Bacteria;p__Firmicutes;c__Erysipelotrichia;o__Erysipelotrichales;f__Erysipelotrichaceae;g__Erysipelatoclostridium;s__	0.572807	0.169507	0.00275112	0.00137169	0.00274078	0.00414091
OTU_547	k__Bacteria;p__Chloroflexi;c__Ktedonobacteria;o__Ktedonobacterales	0.578549	0.166741	0.0201656	0.00962446	0.0288018	0.0220704
OTU_328	k__Bacteria;p__Actinobacteria;c__Thermoleophilia;o__Gaiellales	0.578917	0.166565	0.00550466	0.00825828	0.00411354	0.00414216
OTU_674	k__Bacteria;p__Proteobacteria;c__Deltaproteobacteria;o__Oligoflexales;f__;g__;s__	0.579589	0.166242	0.0490962	0.0592139	0.0370194	0.0510551
OTU_463	k__Bacteria;p__Acidobacteria;c__unidentified_Acidobacteria;o__Subgroup_5;f__;g__;s__	0.581342	0.165402	0.0449123	0.0260964	0.0534914	0.0551491
OTU_858	k__Bacteria;p__Proteobacteria;c__Deltaproteobacteria;o__Oligoflexales;f__Oligoflexaceae;g__;s__	0.584186	0.164043	0.0151342	0.0178717	0.00822707	0.0193038
OTU_950	k__Bacteria;p__Firmicutes;c__Bacilli;o__Bacillales;f__Alicyclobacillaceae;g__Alicyclobacillus	0.585494	0.16342	0.00732883	0.00962379	0.00822944	0.00413326
OTU_1526	k__Bacteria;p__Chloroflexi;c__Ktedonobacteria;o__Ktedonobacterales	0.586662	0.162864	0.0114847	0.0055149	0.0109785	0.0179606
OTU_123	k__Bacteria;p__Proteobacteria;c__Betaproteobacteria;o__Burkholderiales;f__Oxalobacteraceae;g__Massilia	0.587791	0.162328	0.0453368	0.057685	0.0562428	0.0220828
OTU_1339	k__Bacteria;p__Chloroflexi	0.58871	0.161891	0.00504522	0.00275504	0.00686024	0.00552038
OTU_583	k__Bacteria;p__Firmicutes;c__Bacilli;o__Bacillales;f__Alicyclobacillaceae;g__Tumebacillus;s__Tumebacillus_permanentifrigoris	0.589313	0.161605	0.0289502	0.0261705	0.0109738	0.0497064
OTU_1483	k__Bacteria;p__Planctomycetes;c__Planctomycetacia;o__Planctomycetales;f__Planctomycetaceae;g__;s__	0.591302	0.160663	0.00320985	0.00412055	0.00137276	0.00413622
OTU_138	k__Bacteria;p__Chloroflexi;c__Ktedonobacteria;o__JG30-KF-AS9;f__;g__;s__	0.593001	0.15986	0.343549	0.252467	0.326404	0.451777
OTU_939	k__Bacteria;p__Chloroflexi;c__Ktedonobacteria;o__Ktedonobacterales	0.594582	0.159114	0.0142522	0.00830013	0.0109773	0.0234791
OTU_28	k__Bacteria;p__Proteobacteria;c__Gammaproteobacteria;o__Xanthomonadales;f__Xanthomonadaceae;g__Panacagrimonas;s__	0.599172	0.156955	0.0615577	0.0262344	0.058935	0.0995038
OTU_846	k__Bacteria;p__Chloroflexi;c__Ktedonobacteria;o__Ktedonobacterales	0.603356	0.154998	0.00869427	0.00413155	0.0178151	0.00413622
OTU_984	k__Bacteria;p__Chloroflexi;c__;o__;f__;g__;s__	0.604745	0.15435	0.0128489	0.0179184	0.00960339	0.011025
OTU_1082	k__Bacteria;p__Firmicutes;c__Clostridia;o__Clostridiales;f__Ruminococcaceae	0.608319	0.152687	0.00596562	0.00827612	0.00548748	0.00413326
OTU_283	k__Bacteria;p__Actinobacteria;c__Acidimicrobiia;o__Acidimicrobiales;f__;g__;s__	0.609341	0.152213	0.00458604	0.00137169	0.00685668	0.00552975
OTU_1253	k__Bacteria;p__Gemmatimonadetes;c__unidentified_Gemmatimonadetes;o__Gemmatimonadales;f__Gemmatimonadaceae	0.614643	0.149761	0.00504705	0.00138336	0.00411353	0.00964426
OTU_666	k__Bacteria;p__Thermomicrobia;c__unidentified_Thermomicrobia;o__JG30-KF-CM45;f__unidentified_Thermomicrobia;g__unidentified_Thermomicrobia;s__bacterium_Ellin6537	0.615724	0.149263	0.0367009	0.0440581	0.0315533	0.0344914
OTU_459	k__Bacteria;p__Firmicutes;c__Bacilli;o__Bacillales;f__Bacillaceae;g__Bacillus;s__Bacillus_gibsonii	0.616633	0.148844	0.0454158	0.0564286	0.0260611	0.0537578
OTU_391	k__Bacteria;p__Actinobacteria;c__unidentified_Actinobacteria;o__Pseudonocardiales;f__Pseudonocardiaceae;g__Pseudonocardia;s__Pseudonocardia_carboxydivorans	0.617182	0.148592	0.00505053	0.00827544	0.00411472	0.00276144
OTU_66	k__Bacteria;p__Thermomicrobia;c__unidentified_Thermomicrobia;o__JG30-KF-CM45;f__;g__;s__	0.617712	0.148348	0.0183693	0.0248105	0.0137134	0.0165841
OTU_30	k__Bacteria;p__Proteobacteria;c__Alphaproteobacteria;o__Caulobacterales;f__Caulobacteraceae;g__Brevundimonas;s__	0.61792	0.148253	0.0588137	0.0827537	0.0397792	0.0539082
OTU_306	k__Bacteria;p__Acidobacteria;c__unidentified_Acidobacteria;o__Subgroup_3;f__unidentified_Acidobacteria;g__Bryobacter;s__	0.618456	0.148007	0.0684287	0.0731264	0.0548724	0.0772872
OTU_907	k__Bacteria;p__Chloroflexi;c__Ktedonobacteria	0.618814	0.147842	0.00734601	0.0041384	0.00822944	0.00967019
OTU_1130	k__Bacteria;p__Firmicutes;c__Clostridia;o__Clostridiales;f__Lachnospiraceae	0.620359	0.147134	0.0050476	0.00550941	0.00411472	0.00551866
OTU_533	k__Bacteria;p__Chloroflexi;c__Ktedonobacteria;o__Ktedonobacterales;f__HSB_OF53-F07;g__;s__	0.627431	0.143905	0.0225033	0.0179068	0.0192091	0.0303939
OTU_737	k__Bacteria;p__Gemmatimonadetes;c__unidentified_Gemmatimonadetes;o__Gemmatimonadales;f__Gemmatimonadaceae	0.629009	0.143188	0.0109877	0.00412055	0.0178174	0.011025
OTU_1086	k__Bacteria;p__Firmicutes;c__Bacilli;o__Bacillales	0.629078	0.143157	0.0110013	0.00827062	0.0150861	0.00964723
OTU_466	k__Bacteria;p__Proteobacteria;c__Alphaproteobacteria;o__Sphingomonadales;f__Sphingomonadaceae;g__Sphingomonas;s__	0.6307	0.142421	0.0528415	0.022039	0.0466323	0.0898533
OTU_1175	k__Bacteria;p__Proteobacteria;c__Alphaproteobacteria;o__Caulobacterales;f__Caulobacteraceae;g__Brevundimonas	0.633257	0.141263	0.02941	0.0400199	0.020576	0.0276342
OTU_617	k__Bacteria;p__Firmicutes;c__Clostridia;o__Clostridiales;f__Clostridiaceae_1;g__Clostridium_sensu_stricto_6	0.63383	0.141005	0.022016	0.0289064	0.0164553	0.0206863
OTU_288	k__Bacteria;p__Proteobacteria;c__Deltaproteobacteria;o__Myxococcales;f__Sandaracinaceae;g__Sandaracinus;s__	0.64128	0.137652	0.00596385	0.00276671	0.00959509	0.00552975
OTU_1192	k__Bacteria;p__Actinobacteria;c__unidentified_Actinobacteria;o__Propionibacteriales;f__Nocardioidaceae;g__Nocardioides;s__	0.645382	0.135817	0.00686955	0.00550873	0.0109667	0.00413326
OTU_369	k__Bacteria;p__Proteobacteria;c__Alphaproteobacteria	0.648844	0.134275	0.00506203	0.00552108	0.00137039	0.00829463
OTU_105	k__Bacteria;p__Proteobacteria;c__Deltaproteobacteria;o__Myxococcales;f__mle1-27;g__unidentified_mle1-27;s__Myxococcales_bacterium_Gsoil_473	0.649534	0.133968	0.00918738	0.00552725	0.00959983	0.0124351
OTU_1168	k__Bacteria;p__Proteobacteria;c__Betaproteobacteria;o__Burkholderiales;f__Comamonadaceae;g__Ramlibacter;s__	0.653236	0.132326	0.0853589	0.0784821	0.0768188	0.100776
OTU_177	k__Bacteria;p__Chloroflexi;c__Ktedonobacteria;o__Ktedonobacterales;f__Ktedonobacteraceae;g__;s__	0.654682	0.131686	0.165718	0.124092	0.182447	0.190617
OTU_96	k__Bacteria;p__Proteobacteria;c__Alphaproteobacteria;o__Sphingomonadales;f__Sphingomonadaceae;g__Sphingopyxis	0.656605	0.130837	0.0183842	0.0193018	0.0109738	0.024877
OTU_672	k__Bacteria;p__Thermomicrobia;c__unidentified_Thermomicrobia;o__JG30-KF-CM45;f__;g__;s__	0.656962	0.130679	0.00597601	0.00827679	0.00274078	0.00691047
OTU_142	k__Bacteria;p__Acidobacteria;c__unidentified_Acidobacteria;o__Subgroup_6;f__;g__;s__	0.658868	0.129839	0.0206866	0.0261829	0.00822826	0.0276488
OTU_1268	k__Bacteria;p__Gemmatimonadetes;c__unidentified_Gemmatimonadetes;o__Gemmatimonadales;f__Gemmatimonadaceae;g__Gemmatimonas;s__	0.661932	0.128492	0.00505453	0.00274337	0.00274315	0.00967706
OTU_953	k__Bacteria;p__Actinobacteria;c__Thermoleophilia;o__Gaiellales;f__Gaiellaceae;g__Gaiella;s__	0.663011	0.128019	0.00732266	0.00548674	0.0109702	0.00551101
OTU_797	k__Bacteria;p__Firmicutes;c__Bacilli;o__Bacillales;f__Bacillaceae;g__Bacillus;s__Bacillus_trypoxylicola	0.665926	0.126743	0.00918697	0.00966015	0.00548866	0.0124121
OTU_1457	k__Bacteria	0.66611	0.126663	0.00366865	0.00137169	0.00274552	0.00688876
OTU_651	k__Bacteria;p__Chloroflexi;c__Ktedonobacteria;o__Ktedonobacterales	0.671265	0.124416	0.0330499	0.0220452	0.0384195	0.0386851
OTU_41	k__Bacteria;p__Proteobacteria;c__Deltaproteobacteria;o__Oligoflexales;f__Oligoflexaceae;g__Oligoflexus;s__	0.671897	0.124141	0.0225048	0.0137739	0.0205689	0.0331716
OTU_830	k__Bacteria;p__Chloroflexi;c__Ktedonobacteria;o__Ktedonobacterales;f__FCPS473;g__;s__	0.675069	0.122765	0.0261358	0.0220266	0.0301687	0.0262121
OTU_986	k__Bacteria;p__Chloroflexi;c__SHA-26;o__;f__;g__;s__	0.676097	0.12232	0.0110192	0.0137842	0.00548392	0.0137894
OTU_253	k__Bacteria;p__Chloroflexi;c__Ktedonobacteria;o__JG30-KF-AS9;f__;g__;s__	0.678469	0.121295	0.113357	0.100669	0.133049	0.106354
OTU_834	k__Bacteria;p__Chloroflexi;c__Ktedonobacteria;o__Ktedonobacterales	0.680881	0.120254	0.0546612	0.0345304	0.0589812	0.0704721
OTU_469	k__Bacteria	0.68321	0.119253	0.0495561	0.0495867	0.0370349	0.0620468
OTU_1122	k__Bacteria;p__Proteobacteria;c__Deltaproteobacteria;o__Oligoflexales;f__;g__;s__	0.685276	0.118366	0.00322085	0.00415007	0.00137157	0.00414091
OTU_246	k__Bacteria;p__Actinobacteria	0.689227	0.116674	0.00825889	0.011036	0.00959509	0.00414559
OTU_808	k__Bacteria;p__Firmicutes;c__Clostridia;o__Clostridiales;f__Peptostreptococcaceae;g__Sporacetigenium;s__	0.693487	0.114858	0.00688473	0.00688727	0.00548511	0.00828182
OTU_564	k__Bacteria;p__Chloroflexi;c__Ktedonobacteria;o__Ktedonobacterales;f__FCPS473;g__;s__	0.693677	0.114778	0.0518862	0.0400391	0.0576096	0.0580097
OTU_1194	k__Bacteria;p__WD272;c__;o__;f__;g__;s__	0.698728	0.112634	0.00275391	0.00274337	0.00137276	0.00414559
OTU_1208	k__Bacteria;p__Proteobacteria;c__Deltaproteobacteria;o__Myxococcales;f__Polyangiaceae;g__Sorangium;s__	0.700316	0.111962	0.00275238	0.00137718	0.00274078	0.00413919
OTU_255	k__Bacteria;p__Proteobacteria;c__Alphaproteobacteria;o__Sphingomonadales;f__Erythrobacteraceae	0.70074	0.111783	0.0110299	0.0165769	0.00685905	0.00965364
OTU_1756	k__Bacteria;p__Proteobacteria;c__Deltaproteobacteria;o__Myxococcales	0.704555	0.110174	0.00274548	0.00274337	0.00411235	0.00138072
OTU_604	k__Bacteria;p__Thermomicrobia;c__unidentified_Thermomicrobia;o__JG30-KF-CM45;f__unidentified_Thermomicrobia;g__unidentified_Thermomicrobia;s__bacterium_Ellin6537	0.707533	0.108922	0.0252513	0.0317204	0.0219535	0.0220801
OTU_475	k__Bacteria;p__Proteobacteria;c__Deltaproteobacteria;o__Desulfuromonadales;f__GR-WP33-58;g__;s__	0.708208	0.108639	0.00230035	0.00138336	0.00137039	0.00414731
OTU_622	k__Bacteria;p__Proteobacteria;c__Deltaproteobacteria;o__Bdellovibrionales;f__Bacteriovoracaceae;g__Peredibacter	0.708208	0.108639	0.00230035	0.00138336	0.00137039	0.00414731
OTU_500	k__Bacteria;p__Proteobacteria;c__Alphaproteobacteria;o__Rhizobiales;f__Rhodobiaceae;g__;s__	0.709268	0.108195	0.0197278	0.02341	0.0137157	0.0220576
OTU_936	k__Bacteria;p__Chloroflexi;c__Ktedonobacteria;o__Ktedonobacterales;f__Ktedonobacteraceae	0.710122	0.107837	0.0151427	0.0165406	0.0164589	0.0124287
OTU_1782	k__Bacteria;p__Gemmatimonadetes;c__unidentified_Gemmatimonadetes;o__AT425-EubC11_terrestrial_group;f__;g__;s__	0.711254	0.107363	0.00229313	0.00138336	0.00411828	0.00137775
OTU_854	k__Bacteria;p__Chloroflexi;c__Ktedonobacteria;o__Ktedonobacterales;f__FCPS473;g__;s__	0.711817	0.107128	0.0087171	0.00824661	0.00686142	0.0110433
OTU_33	k__Bacteria;p__Cyanobacteria;c__Chloroplast;o__unidentified_Chloroplast;f__unidentified_Chloroplast;g__unidentified_Chloroplast	0.713009	0.10663	0.00920599	0.00968349	0.00411353	0.0138209
OTU_506	k__Bacteria;p__Chloroflexi;c__Ktedonobacteria;o__JG30-KF-AS9;f__;g__;s__	0.715613	0.105543	0.051886	0.0386434	0.0576108	0.0594037
OTU_1789	k__Bacteria;p__Firmicutes;c__Clostridia;o__Clostridiales	0.716849	0.105029	0.00458783	0.00689209	0.0041159	0.0027555
OTU_623	k__Bacteria;p__Chloroflexi	0.71692	0.104999	0.0151599	0.0151805	0.0123453	0.0179537
OTU_1550	k__Bacteria;p__Acidobacteria;c__unidentified_Acidobacteria;o__Acidobacteriales;f__Acidobacteriaceae_.Subgroup_1.;g__Granulicella;s__	0.717152	0.104902	0.00366897	0.00137169	0.00411235	0.00552288
OTU_1117	k__Bacteria;p__Chloroflexi;c__Ktedonobacteria;o__Ktedonobacterales	0.717211	0.104878	0.00459651	0.00276671	0.00411235	0.00691047
OTU_1765	k__Bacteria;p__Proteobacteria;c__Deltaproteobacteria;o__Myxococcales;f__Polyangiaceae;g__Polyangium;s__	0.717716	0.104668	0.00367349	0.00137718	0.00411353	0.00552975
OTU_1616	k__Bacteria;p__Proteobacteria;c__Alphaproteobacteria;o__Rhizobiales	0.718577	0.10431	0.00458323	0.00686393	0.00274315	0.00414263
OTU_1282	k__Bacteria;p__Firmicutes;c__Bacilli;o__Bacillales;f__Alicyclobacillaceae;g__Alicyclobacillus	0.723622	0.102218	0.00411788	0.00411506	0.00685786	0.00138072
OTU_518	k__Bacteria;p__Proteobacteria	0.726499	0.10103	0.00183897	0.00138336	0.00137039	0.00276316
OTU_545	k__Bacteria;p__Chloroflexi;c__Ktedonobacteria;o__Ktedonobacterales	0.727435	0.100644	0.0224978	0.019308	0.0219452	0.0262402
OTU_1595	k__Bacteria;p__Gemmatimonadetes;c__unidentified_Gemmatimonadetes;o__Gemmatimonadales;f__Gemmatimonadaceae;g__Gemmatimonas;s__	0.72816	0.100346	0.00321192	0.00275437	0.00137039	0.00551101
OTU_201	k__Bacteria;p__Bacteroidetes;c__Sphingobacteriia;o__Sphingobacteriales;f__Chitinophagaceae;g__Flavitalea;s__	0.728723	0.100114	0.00183635	0.00275504	0.00137157	0.00138244
OTU_979	k__Bacteria;p__Verrucomicrobia;c__OPB35_soil_group;o__;f__;g__;s__	0.730048	0.0995691	0.0196919	0.0219635	0.0246836	0.0124287
OTU_1414	k__Bacteria;p__Chloroflexi;c__Ktedonobacteria;o__JG30-KF-AS9	0.731956	0.0987853	0.00229616	0.00138336	0.00274196	0.00276316
OTU_1254	k__Bacteria;p__Chloroflexi;c__Ktedonobacteria;o__JG30-KF-AS9;f__;g__;s__	0.735196	0.0974572	0.00642615	0.00687492	0.00411235	0.00829119
OTU_81	k__Bacteria;p__Proteobacteria;c__Alphaproteobacteria;o__Rhizobiales;f__Phyllobacteriaceae;g__Chelativorans;s__Chelativorans_sp._BNC1	0.73553	0.0973206	0.00734737	0.00411506	0.00548511	0.0124419
OTU_1342	k__Bacteria;p__Firmicutes;c__Bacilli;o__Bacillales;f__Alicyclobacillaceae;g__Tumebacillus;s__	0.740279	0.0953823	0.0114639	0.00688727	0.0164577	0.0110467
OTU_338	k__Bacteria;p__Proteobacteria;c__Deltaproteobacteria;o__Myxococcales;f__Polyangiaceae;g__Sorangium;s__	0.744873	0.0935149	0.0146821	0.015127	0.010969	0.0179503
OTU_19	k__Bacteria;p__Proteobacteria;c__Alphaproteobacteria;o__Rhizobiales;f__Rhizobiaceae;g__Rhizobium	0.751459	0.0908511	0.0427108	0.0413277	0.0329118	0.0538927
OTU_856	k__Bacteria;p__Firmicutes;c__Bacilli;o__Bacillales;f__Alicyclobacillaceae;g__Alicyclobacillus;s__	0.752151	0.0905719	0.00734852	0.00690443	0.00548155	0.00965957
OTU_844	k__Bacteria;p__Actinobacteria;c__unidentified_Actinobacteria;o__Micromonosporales;f__Micromonosporaceae;g__Planosporangium;s__	0.753487	0.0900338	0.0114686	0.0124077	0.0137134	0.00828479
OTU_963	k__Bacteria	0.760433	0.0872461	0.00872589	0.0110422	0.00960575	0.00552975
OTU_1319	k__Bacteria;p__Actinobacteria;c__unidentified_Actinobacteria;o__Pseudonocardiales;f__Pseudonocardiaceae;g__Crossiella;s__	0.771383	0.0828858	0.00459716	0.00415007	0.00274078	0.00690063
OTU_556	k__Bacteria;p__Proteobacteria;c__Alphaproteobacteria;o__Rhodospirillales;f__DA111;g__;s__	0.772219	0.0825546	0.0238468	0.0192606	0.026054	0.0262257
OTU_1740	k__Bacteria;p__Acidobacteria;c__unidentified_Acidobacteria;o__Subgroup_3;f__unidentified_Acidobacteria;g__Bryobacter;s__	0.772431	0.0824706	0.00366971	0.00275437	0.00274078	0.00551398
OTU_1138	k__Bacteria;p__Proteobacteria	0.772629	0.0823926	0.00367247	0.00138336	0.00411117	0.00552288
OTU_1229	k__Bacteria;p__Thermomicrobia;c__unidentified_Thermomicrobia;o__JG30-KF-CM45;f__;g__;s__	0.773301	0.0821266	0.00412572	0.00413772	0.00548392	0.0027555
OTU_419	k__Bacteria;p__Proteobacteria;c__Betaproteobacteria;o__SC-I-84;f__;g__;s__	0.775078	0.081424	0.00366881	0.00549841	0.00274315	0.00276488
OTU_569	k__Bacteria;p__Proteobacteria;c__Alphaproteobacteria;o__Rhodospirillales;f__Rhodospirillaceae;g__Elstera;s__	0.778307	0.0801501	0.0178861	0.0165111	0.015079	0.0220682
OTU_21	k__Bacteria;p__Acidobacteria;c__unidentified_Acidobacteria;o__Subgroup_3;f__Elev-16S-1166;g__;s__	0.780879	0.0791378	0.0491947	0.0483324	0.031526	0.0677257
OTU_134	k__Bacteria;p__Actinobacteria;c__Acidimicrobiia;o__Acidimicrobiales;f__;g__;s__	0.784245	0.0778166	0.00964958	0.00964163	0.00548274	0.0138244
OTU_1758	k__Bacteria;p__Gemmatimonadetes;c__unidentified_Gemmatimonadetes;o__Gemmatimonadales;f__Gemmatimonadaceae;g__unidentified_Gemmatimonadetes;s__Gemmatimonadetes_bacterium_LX87	0.785826	0.0771974	0.0077925	0.00687492	0.0109797	0.00552288
OTU_390	k__Bacteria;p__Chloroflexi;c__Ktedonobacteria;o__Ktedonobacterales;f__Ktedonobacteraceae;g__;s__	0.786012	0.0771248	0.0371842	0.0427454	0.0356585	0.0331485
OTU_1877	k__Bacteria;p__Chloroflexi;c__Ktedonobacteria;o__JG30-KF-AS9;f__;g__;s__	0.790964	0.0751905	0.120258	0.118616	0.137168	0.104991
OTU_698	k__Bacteria;p__Proteobacteria;c__Alphaproteobacteria;o__Rhodospirillales;f__Acetobacteraceae;g__Acidisphaera;s__	0.797992	0.0724594	0.0422011	0.0454311	0.0397768	0.0413955
OTU_165	k__Bacteria;p__Chloroflexi;c__Chloroflexia;o__Kallotenuales;f__AKIW781;g__;s__	0.801217	0.0712119	0.00596336	0.00688727	0.0068555	0.00414731
OTU_1705	k__Bacteria;p__Verrucomicrobia;c__OPB35_soil_group;o__;f__;g__;s__	0.804198	0.0700613	0.00961676	0.0123507	0.0109797	0.00551991
OTU_104	k__Bacteria;p__Verrucomicrobia;c__OPB35_soil_group;o__unidentified_OPB35_soil_group;f__unidentified_OPB35_soil_group;g__unidentified_OPB35_soil_group;s__bacterium_Ellin517	0.812334	0.0669358	0.0055143	0.00276671	0.00548155	0.00829463
OTU_1654	k__Bacteria;p__Firmicutes;c__Bacilli;o__Bacillales;f__Bacillaceae	0.812849	0.0667388	0.00275701	0.00138336	0.00274552	0.00414216
OTU_899	k__Bacteria;p__Verrucomicrobia;c__OPB35_soil_group;o__;f__;g__;s__	0.813464	0.0665034	0.00274896	0.00411506	0.00137039	0.00276144
OTU_1284	k__Bacteria;p__Actinobacteria;c__Thermoleophilia;o__Gaiellales;f__unidentified_Gaiellales;g__unidentified_Gaiellales;s__bacterium_Ellin6504	0.813833	0.0663621	0.00549878	0.0068756	0.00548748	0.00413326
OTU_394	k__Bacteria;p__Proteobacteria;c__Betaproteobacteria;o__Burkholderiales;f__Oxalobacteraceae	0.814877	0.0659631	0.00825034	0.0109845	0.00685905	0.0069075
OTU_861	k__Bacteria;p__Firmicutes	0.815003	0.0659151	0.0105503	0.011001	0.00823181	0.012418
OTU_1299	k__Bacteria;p__Acidobacteria;c__unidentified_Acidobacteria;o__Acidobacteriales;f__Acidobacteriaceae_.Subgroup_1.	0.815289	0.0658056	0.0032096	0.00411506	0.00137157	0.00414216
OTU_1375	k__Bacteria;p__Actinobacteria;c__Thermoleophilia;o__Gaiellales	0.815429	0.0657522	0.0160552	0.0137745	0.0150802	0.019311
OTU_921	k__Bacteria;p__Actinobacteria;c__unidentified_Actinobacteria;o__Propionibacteriales;f__Nocardioidaceae;g__Nocardioides	0.815529	0.065714	0.00275344	0.00276671	0.00411117	0.00138244
OTU_1250	k__Bacteria;p__WD272;c__;o__;f__;g__;s__	0.816155	0.0654751	0.0050514	0.00552725	0.00686379	0.00276316
OTU_586	k__Bacteria;p__Actinobacteria;c__Acidimicrobiia;o__Acidimicrobiales;f__;g__;s__	0.819322	0.0642678	0.0321079	0.035782	0.0301734	0.0303683
OTU_161	k__Bacteria;p__Cyanobacteria;c__ML635J-21;o__;f__;g__;s__	0.832472	0.0592885	0.0128658	0.0165385	0.00685194	0.0152068
OTU_189	k__Bacteria;p__Proteobacteria;c__Alphaproteobacteria;o__Rhodospirillales;f__Rhodospirillaceae;g__Inquilinus;s__	0.838116	0.0571672	0.00550042	0.00411506	0.00548511	0.0069011
OTU_1211	k__Bacteria;p__Cyanobacteria;c__ML635J-21;o__;f__;g__;s__	0.839105	0.0567965	0.00412896	0.00411506	0.00274552	0.00552631
OTU_1361	k__Bacteria;p__Thermomicrobia;c__unidentified_Thermomicrobia;o__JG30-KF-CM45;f__;g__;s__	0.840567	0.0562488	0.0123827	0.015151	0.010969	0.011028
OTU_1312	k__Bacteria;p__Verrucomicrobia;c__OPB35_soil_group;o__unidentified_OPB35_soil_group;f__unidentified_OPB35_soil_group;g__Pedosphaera;s__	0.847042	0.0538321	0.00778753	0.00548674	0.00959746	0.00827838
OTU_996	k__Bacteria;p__Proteobacteria;c__Alphaproteobacteria;o__Rhodospirillales;f__Acetobacteraceae	0.847457	0.0536774	0.00183604	0.00137169	0.00137157	0.00276488
OTU_295	k__Bacteria;p__Cyanobacteria;c__Chloroplast;o__unidentified_Chloroplast;f__unidentified_Chloroplast;g__unidentified_Chloroplast	0.849128	0.0530559	0.00184033	0.00138336	0.00137276	0.00276488
OTU_638	k__Bacteria;p__Proteobacteria;c__Alphaproteobacteria;o__Rhizobiales;f__A0839;g__;s__	0.849612	0.0528759	0.00183456	0.00275437	0.00137157	0.00137775
OTU_635	k__Bacteria;p__Proteobacteria;c__Gammaproteobacteria;o__Pseudomonadales;f__Pseudomonadaceae;g__Pseudomonas;s__Pseudomonas_alcaligenes	0.85085	0.0524161	0.00229559	0.00276054	0.00274552	0.00138072
OTU_1883	k__Bacteria;p__Chloroflexi	0.851209	0.0522829	0.0045843	0.00550873	0.00548866	0.0027555
OTU_1514	k__Bacteria;p__Acidobacteria;c__unidentified_Acidobacteria;o__Subgroup_6;f__;g__;s__	0.851397	0.0522131	0.00183007	0.00137169	0.00274078	0.00137775
OTU_1534	k__Bacteria;p__Proteobacteria;c__Gammaproteobacteria;o__Legionellales;f__Coxiellaceae;g__;s__	0.851428	0.0522018	0.00183189	0.00274337	0.00137157	0.00138072
OTU_415	k__Bacteria;p__Actinobacteria;c__unidentified_Actinobacteria;o__Propionibacteriales;f__Nocardioidaceae;g__Nocardioides;s__	0.851583	0.0521442	0.00183228	0.00274337	0.00137276	0.00138072
OTU_1571	k__Bacteria;p__Proteobacteria;c__Gammaproteobacteria;o__Xanthomonadales;f__Xanthomonadaceae;g__Rhodanobacter;s__	0.851879	0.0520341	0.00183447	0.00137718	0.00274552	0.00138072
OTU_1213	k__Bacteria;p__Cyanobacteria;c__unidentified_Cyanobacteria	0.85233	0.051867	0.00229598	0.00138336	0.00274315	0.00276144
OTU_72	k__Bacteria;p__Proteobacteria;c__Alphaproteobacteria;o__Rhodospirillales;f__Rhodospirillaceae;g__Defluviicoccus;s__	0.852849	0.0516747	0.0160685	0.0179369	0.0178316	0.0124368
OTU_514	k__Bacteria;p__Chloroflexi	0.852991	0.051622	0.0380636	0.0440533	0.0342917	0.0358458
OTU_563	k__Bacteria;p__Actinobacteria;c__Acidimicrobiia;o__Acidimicrobiales;f__Iamiaceae;g__Iamia;s__	0.853518	0.0514266	0.00183552	0.00138336	0.00274078	0.00138244
OTU_802	k__Bacteria;p__Chloroflexi;c__Ktedonobacteria;o__JG30-KF-AS9;f__;g__;s__	0.857902	0.0498056	0.012393	0.00964163	0.0137181	0.0138192
OTU_1129	k__Bacteria;p__Chloroflexi;c__Ktedonobacteria;o__Ktedonobacterales;f__HSB_OF53-F07;g__;s__	0.860148	0.048977	0.00689397	0.00690443	0.00548629	0.00829119
OTU_233	k__Bacteria;p__Proteobacteria;c__Alphaproteobacteria;o__Rhodospirillales;f__DA111;g__;s__	0.860167	0.0489698	0.0885356	0.0798559	0.0877606	0.0979903
OTU_1135	k__Bacteria;p__Actinobacteria;c__unidentified_Actinobacteria;o__Pseudonocardiales;f__Pseudonocardiaceae;g__Pseudonocardia;s__	0.862416	0.0481419	0.00551091	0.00689276	0.00411709	0.00552288
OTU_1088	k__Bacteria;p__Chloroflexi;c__Ktedonobacteria;o__Ktedonobacterales;f__HSB_OF53-F07;g__;s__	0.86632	0.0467075	0.0073545	0.00828779	0.00548748	0.00828822
OTU_361	k__Bacteria;p__Acidobacteria;c__unidentified_Acidobacteria;o__Subgroup_6;f__;g__;s__	0.873056	0.0442433	0.0036751	0.00276671	0.00411472	0.00414388
OTU_489	k__Bacteria;p__Chloroflexi;c__Ktedonobacteria;o__Ktedonobacterales;f__HSB_OF53-F07;g__;s__	0.877514	0.0426192	0.0854455	0.0786845	0.0781927	0.0994593
OTU_642	k__Bacteria;p__Proteobacteria;c__Alphaproteobacteria;o__Rhodospirillales;f__Acetobacteraceae;g__Acidiphilium;s__	0.879364	0.0419469	0.0119315	0.0137972	0.0123382	0.0096591
OTU_1840	k__Bacteria;p__Firmicutes;c__Bacilli;o__Bacillales;f__Paenibacillaceae;g__Cohnella;s__	0.881766	0.0410755	0.0137665	0.0151634	0.0109714	0.0151646
OTU_972	k__Bacteria;p__Chloroflexi;c__Ktedonobacteria;o__Ktedonobacterales;f__HSB_OF53-F07;g__;s__	0.885245	0.0398159	0.00688421	0.00689344	0.00822944	0.00552975
OTU_1081	k__Bacteria;p__Acidobacteria;c__unidentified_Acidobacteria;o__Subgroup_3;f__unidentified_Acidobacteria;g__Bryobacter;s__	0.893287	0.0369171	0.00550542	0.00686942	0.00411709	0.00552975
OTU_1543	k__Bacteria;p__Firmicutes;c__Bacilli;o__Bacillales;f__Paenibacillaceae;g__Paenibacillus	0.895585	0.0360919	0.00229288	0.00274337	0.00137039	0.00276488
OTU_424	k__Bacteria;p__Proteobacteria;c__Betaproteobacteria;o__Burkholderiales	0.897667	0.0353456	0.0453739	0.0508698	0.0452572	0.0399948
OTU_340	k__Bacteria;p__Proteobacteria;c__Betaproteobacteria;o__Nitrosomonadales;f__Nitrosomonadaceae;g__;s__	0.897707	0.0353314	0.00229195	0.00275437	0.00274078	0.00138072
OTU_252	k__Bacteria;p__Proteobacteria;c__Gammaproteobacteria;o__Pseudomonadales;f__Pseudomonadaceae;g__Pseudomonas	0.906757	0.0321005	0.00919376	0.0110422	0.00686379	0.00967534
OTU_298	k__Bacteria;p__Bacteroidetes;c__Sphingobacteriia;o__Sphingobacteriales;f__Chitinophagaceae;g__Chitinophaga;s__Chitinophaga_terrae_Kim_and_Jung_2007	0.909809	0.0310157	0.00732808	0.00548674	0.0095939	0.0069036
OTU_1803	k__Bacteria;p__Firmicutes;c__Bacilli;o__Bacillales;f__Paenibacillaceae;g__Brevibacillus;s__	0.911757	0.0303246	0.00320857	0.00274337	0.00274315	0.00413919
OTU_231	k__Bacteria;p__Bacteroidetes;c__Sphingobacteriia;o__Sphingobacteriales;f__Chitinophagaceae;g__Flavitalea;s__	0.919552	0.0275689	0.00596972	0.00689893	0.00548392	0.00552631
OTU_925	k__Bacteria;p__Actinobacteria;c__Acidimicrobiia;o__Acidimicrobiales	0.929715	0.0239998	0.00504411	0.00549841	0.00411353	0.00552038
OTU_1153	k__Bacteria;p__Actinobacteria;c__Acidimicrobiia;o__Acidimicrobiales;f__;g__;s__	0.93402	0.0224954	0.00550486	0.00550873	0.00411709	0.00688876
OTU_762	k__Bacteria;p__WCHB1-60;c__;o__;f__;g__;s__	0.936776	0.0215349	0.0128574	0.0124269	0.0150944	0.0110509
OTU_621	k__Bacteria;p__Chloroflexi;c__Ktedonobacteria;o__Ktedonobacterales;f__HSB_OF53-F07;g__;s__	0.938537	0.0209224	0.0229694	0.0220733	0.0205783	0.0262565
OTU_1242	k__Bacteria;p__Proteobacteria;c__Betaproteobacteria;o__Nitrosomonadales;f__Nitrosomonadaceae;g__;s__	0.939254	0.0206731	0.00366714	0.00274337	0.0041159	0.00414216
OTU_765	k__Bacteria;p__Chloroflexi;c__Ktedonobacteria;o__Ktedonobacterales	0.940181	0.020351	0.021571	0.0206728	0.0233203	0.0207199
OTU_1475	k__Bacteria;p__Firmicutes;c__Clostridia;o__Clostridiales;f__Clostridiaceae_1;g__Fonticella;s__	0.94078	0.0201432	0.00366686	0.00413155	0.00411353	0.0027555
OTU_1298	k__Bacteria;p__Planctomycetes;c__Phycisphaerae;o__WD2101_soil_group;f__;g__;s__	0.943704	0.0191289	0.00643132	0.00689826	0.00548866	0.00690703
OTU_1834	k__Bacteria;p__Firmicutes;c__Bacilli;o__Bacillales;f__Paenibacillaceae;g__Paenibacillus	0.943989	0.0190303	0.00320457	0.00411506	0.00274315	0.0027555
OTU_444	k__Bacteria;p__Thermomicrobia;c__unidentified_Thermomicrobia;o__JG30-KF-CM45;f__;g__;s__	0.94447	0.0188635	0.00320765	0.00274337	0.00411472	0.00276488
OTU_1165	k__Bacteria;p__Gemmatimonadetes;c__unidentified_Gemmatimonadetes;o__Gemmatimonadales;f__Gemmatimonadaceae;g__Gemmatimonas;s__	0.950479	0.0167871	0.00780018	0.00826995	0.00823418	0.00689641
OTU_1808	k__Bacteria;p__Bacteroidetes;c__Cytophagia;o__Cytophagales;f__Cytophagaceae;g__Sporocytophaga;s__	0.950535	0.0167679	0.00504097	0.00411506	0.00548748	0.00552038
OTU_32	k__Bacteria;p__Proteobacteria;c__Betaproteobacteria;o__Burkholderiales;f__Comamonadaceae;g__Azohydromonas;s__	0.951378	0.0164774	0.0555556	0.060692	0.0562239	0.049751
OTU_1070	k__Bacteria;p__Acidobacteria;c__unidentified_Acidobacteria;o__Acidobacteriales;f__Acidobacteriaceae_.Subgroup_1.;g__Candidatus_Koribacter;s__	0.963262	0.012399	0.00504189	0.00549841	0.00549104	0.00413622
OTU_1630	k__Bacteria;p__Proteobacteria;c__Deltaproteobacteria;o__Myxococcales;f__Haliangiaceae;g__Haliangium;s__	0.967095	0.0110908	0.00503752	0.00549774	0.00548155	0.00413326
OTU_375	k__Bacteria;p__Actinobacteria;c__unidentified_Actinobacteria;o__Propionibacteriales;f__Nocardioidaceae;g__Nocardioides;s__	0.968622	0.0105707	0.00643559	0.0069106	0.00548867	0.0069075
OTU_969	k__Bacteria;p__Chloroflexi;c__Ktedonobacteria;o__JG30-KF-AS9	0.97235	0.0093031	0.00596226	0.00688591	0.00548392	0.00551694
OTU_557	k__Bacteria;p__Proteobacteria;c__Gammaproteobacteria;o__Xanthomonadales;f__Xanthomonadaceae;g__Lysobacter	0.974393	0.00860975	0.00596825	0.00689344	0.00548155	0.00552975
OTU_1071	k__Bacteria;p__Chloroflexi;c__Ktedonobacteria;o__JG30-KF-AS9;f__;g__;s__	0.974912	0.00843348	0.00780592	0.00827612	0.00822944	0.00691219
OTU_119	k__Bacteria;p__Proteobacteria;c__Alphaproteobacteria;o__Sphingomonadales;f__7B-8;g__;s__	0.983401	0.00556399	0.00871714	0.00962379	0.008233	0.00829463
OTU_476	k__Bacteria;p__Actinobacteria;c__Thermoleophilia;o__Solirubrobacterales;f__480-2;g__unidentified_480-2;s__Rubrobacterineae_bacterium_BR7-21	0.984632	0.00514921	0.0279519	0.0288494	0.0288042	0.026202
OTU_215	k__Bacteria;p__Verrucomicrobia;c__Verrucomicrobiae;o__Verrucomicrobiales;f__Verrucomicrobiaceae;g__Verrucomicrobium;s__	0.9942	0.211078	0.001	0.002	0	0
OTU_443	k__Bacteria;p__Chloroflexi;c__Ktedonobacteria;o__Ktedonobacterales	0.999466	0.000178114	0.030284	0.0303096	0.0301782	0.0303641
OTU_324	k__Bacteria;p__Chloroflexi;c__KD4-96;o__;f__;g__;s__	0.999958	1.38515e-05	0.00413307	0.00413772	0.00411591	0.00414559
OTU_1546	k__Bacteria;p__Chloroflexi;c__Ktedonobacteria;o__JG30-KF-AS9;f__;g__;s__	0.999982	6.037e-06	0.00275903	0.00276671	0.00274552	0.00276488
